# Supplementary material for: Fat body phospholipid state dictates hunger-driven feeding behavior
Source: eLife journal article supplement (doi:10.7554/elife.80282), 2022-10-06

## Figure 6- figure supplement 3

### Lipid Class Concentration under Fat Body Pect Knockdown

**TAG Lipid Class Concentration**

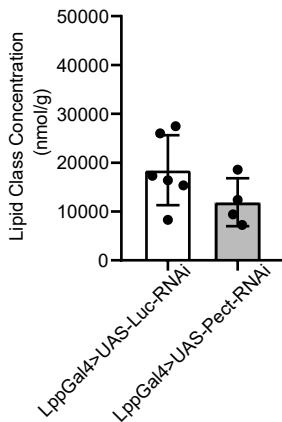

**DAG Lipid Class Concentration**

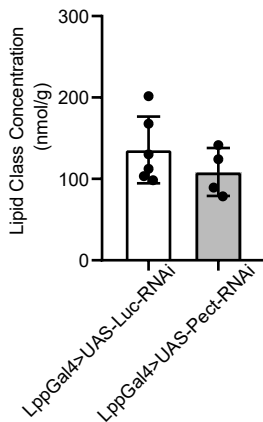

**FFA Lipid Class Concentration**

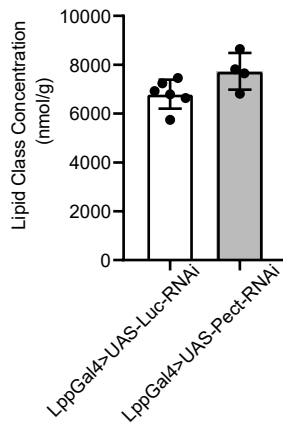

**CE Lipid Class Concentration**

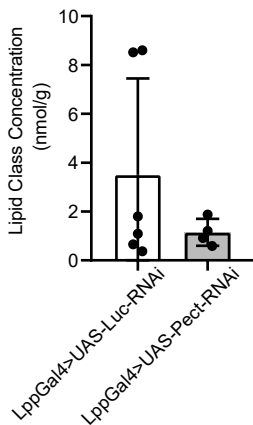

**SM Lipid Class Concentration**

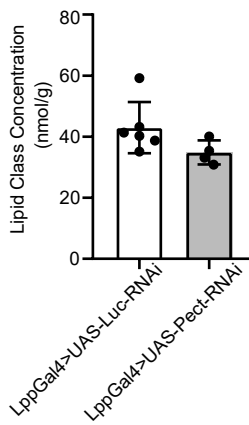

Supplement: supp [file elife-80282-supp-v1.zip]
