# Supplementary material for: Fat body phospholipid state dictates hunger-driven feeding behavior
Source: eLife journal article supplement (doi:10.7554/elife.80282), 2022-10-06

Figure 6- figure supplement 2

A. PC Composition of Nomal Diet (By Class)

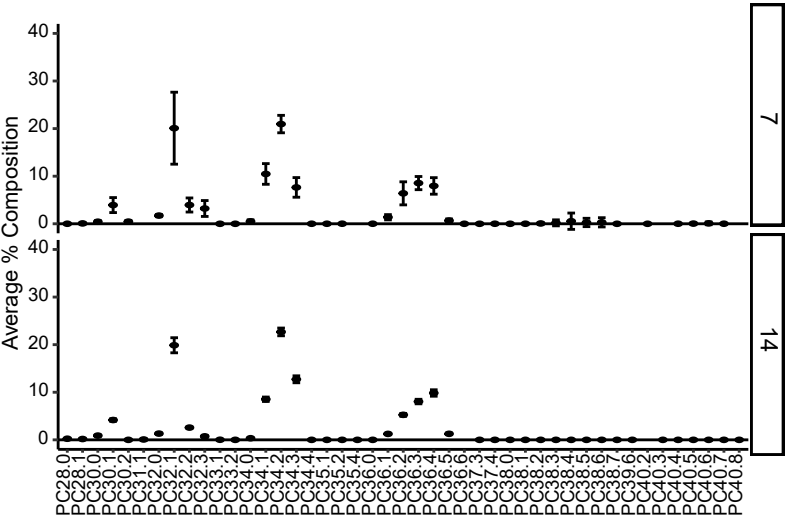

B. PE Composition of Nomal Diet (By Class)

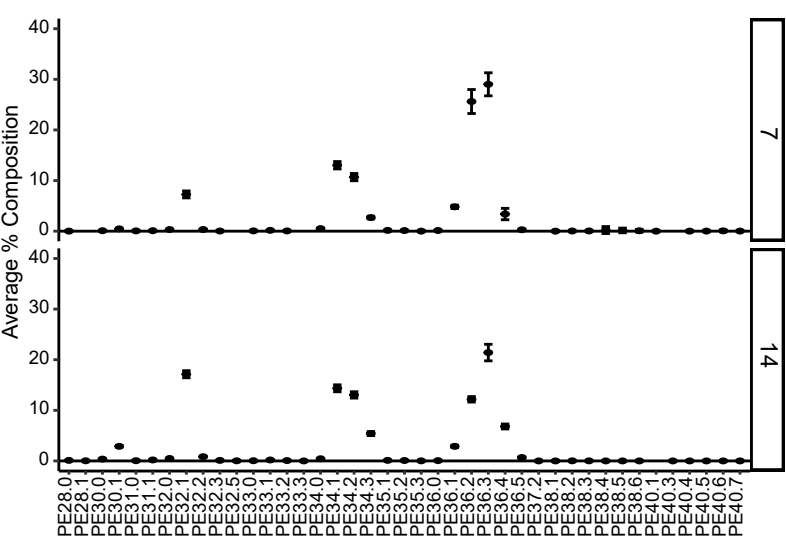

C. Difference in PECTAssociated Phospholipid Classes (NF vs. HSD)

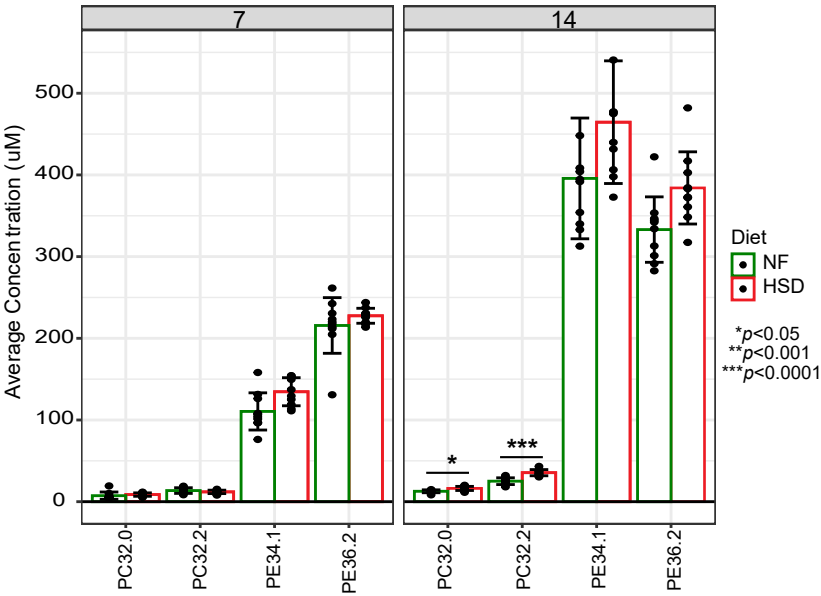

Supplement: supp [file elife-80282-supp-v1.zip]
