# Supplementary material for: Fat body phospholipid state dictates hunger-driven feeding behavior
Source: eLife journal article supplement (doi:10.7554/elife.80282), 2022-10-06
Supplement: supp [file elife-80282-supp-v1.zip]

Archive with 31 entries (31 files):
- elife_poa_e80282_Figure_1_figure_supplement_1.pdf
- elife_poa_e80282_Figure_1_figure_supplement_2.pdf
- elife_poa_e80282_Figure_2_figure_supplement_1.pdf
- elife_poa_e80282_Figure_2_figure_supplement_2.pdf
- elife_poa_e80282_Figure_3_figure_supplement_1.pdf
- elife_poa_e80282_Figure_4_figure_supplement_1.pdf
- elife_poa_e80282_Figure_6_figure_supplement_1.pdf
- elife_poa_e80282_Figure_6_figure_supplement_2.pdf
- elife_poa_e80282_Figure_6_figure_supplement_3.pdf
- elife_poa_e80282_Figure_6_figure_supplement_4.pdf
- elife_poa_e80282_Figure_1_source_data_1.xlsx
- elife_poa_e80282_Figure_1_source_data_2.xlsx
- elife_poa_e80282_Figure_1_source_data_3.xlsx
- elife_poa_e80282_Figure_1_source_data_4.xlsx
- elife_poa_e80282_Figure_1_source_data_5.xlsx
- elife_poa_e80282_Figure_1_figure_supplement_1_source_data_1.xlsx
- elife_poa_e80282_Figure_1_figure_supplement_2_source_data_2.xlsx
- elife_poa_e80282_Figure_2_source_data_1.xlsx
- elife_poa_e80282_Figure_2_source_data_2.xlsx
- elife_poa_e80282_Figure_2_figure_supplement_2_source_data_1.xlsx
- elife_poa_e80282_Figure_3_source_data_1.xlsx
- elife_poa_e80282_Figure_3_source_data_2.xlsx
- elife_poa_e80282_Figure_4_source_data_1.xlsx
- elife_poa_e80282_Figure_4_source_data_2.xlsx
- elife_poa_e80282_Figure_4_source_data_3.xlsx
- elife_poa_e80282_Figure_5_source_data_1.xlsx
- elife_poa_e80282_Figure_6_source_data_1.xlsx
- elife_poa_e80282_Figure_6_figure_supplement_1_source_data_1.xlsx
- elife_poa_e80282_Figure_6_figure_supplement_1_source_data_2.xlsx
- elife_poa_e80282_Figure_7_source_data_1.xlsx
- elife_poa_e80282_Figure_7_source_data_2.xlsx
