# Supplementary material for: Fat body phospholipid state dictates hunger-driven feeding behavior
Source: eLife journal article supplement (doi:10.7554/elife.80282), 2022-10-06

Figure 3- figure supplement 1

A. Change in concentration of lipid classes in HSD vs. NF

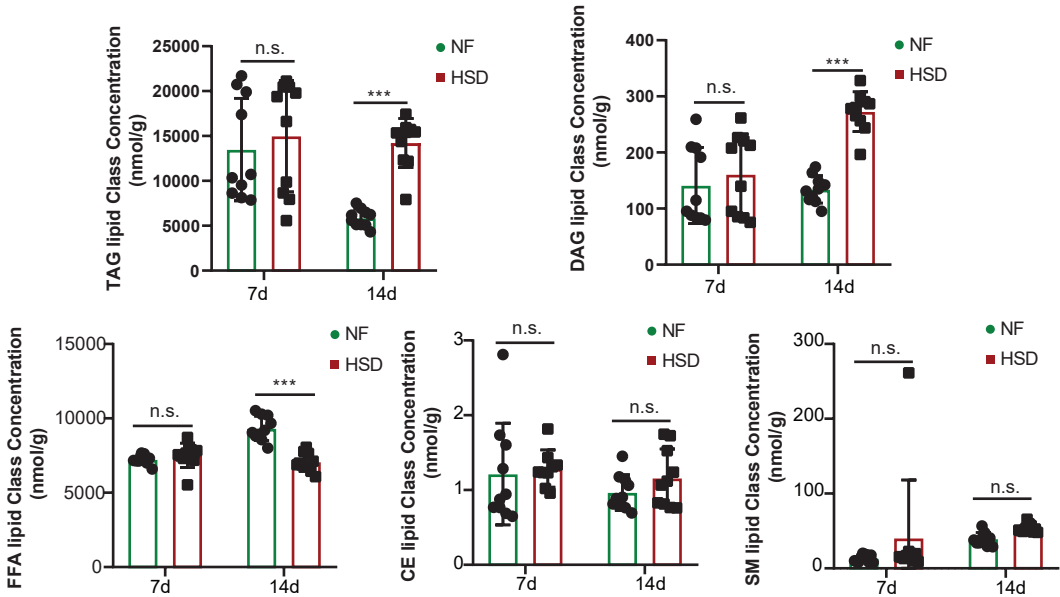

B. Difference in FFA Lipid Concentration (By Species) after 7 and 14 days of HSD

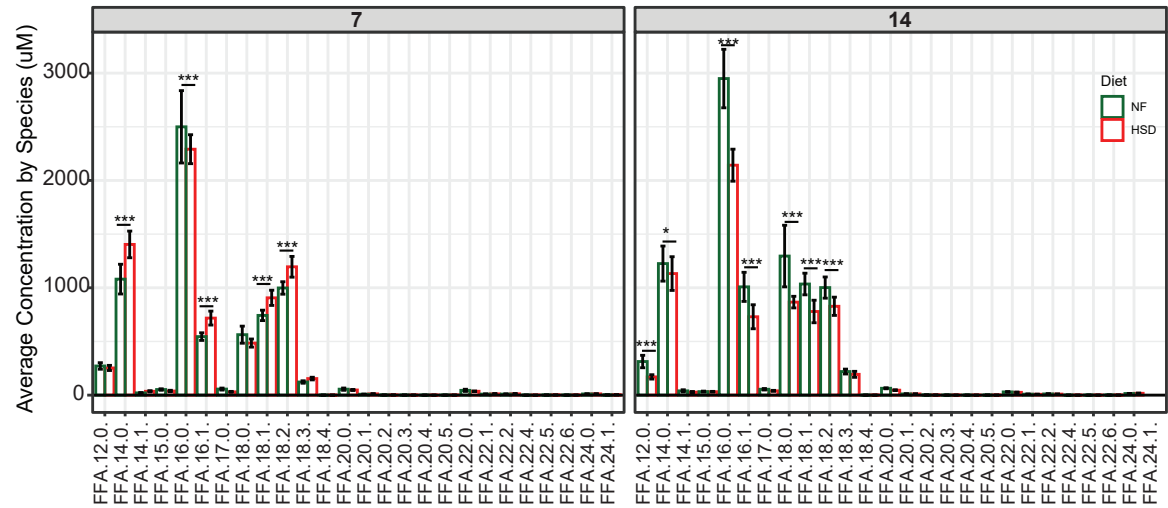

C. Change in concentration of PE doublebond species after 7 and 14 days of HSD

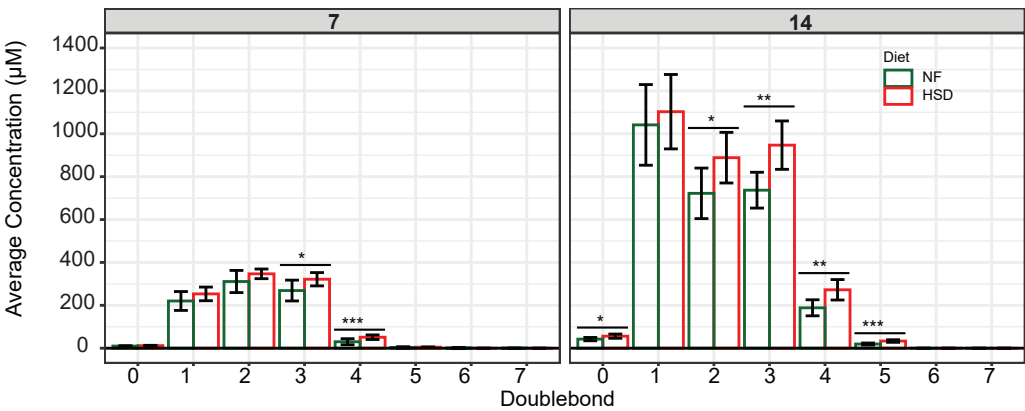

D. Change in concentration of PC doublebond species in HSD vs. NF

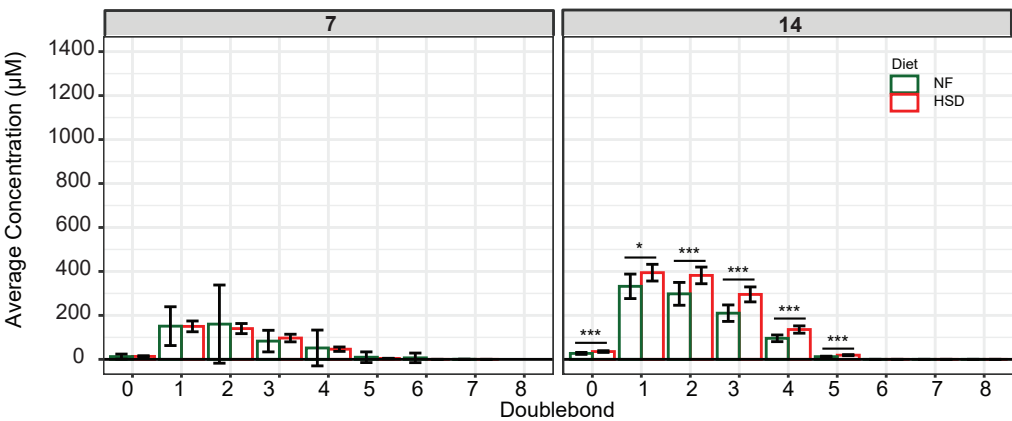

Supplement: supp [file elife-80282-supp-v1.zip]
