# Supplementary material for: Fat body phospholipid state dictates hunger-driven feeding behavior
Source: eLife journal article supplement (doi:10.7554/elife.80282), 2022-10-06
Supplement: supp [file elife-80282-supp-v1.zip › elife_poa_e80282_Figure_1_figure_supplement_1_source_data_1.xlsx]

## Sheet: Sheet1
A. w1118 Hunger Driven Feeding Responses on NF and HSD
Genotype	Diet	Day	Licks	Events
W1118	NFfed	3	0	0
W1118	NFfed	3	5	1
W1118	NFfed	3	0	0
W1118	NFfed	3	0	0
W1118	NFfed	3	42	6
W1118	NFfed	3	8	1
W1118	NFfed	3	193	7
W1118	NFfed	3	0	0
W1118	NFfed	3	68	3
W1118	NFfed	3	111	7
W1118	NFfed	3	83	11
W1118	NFfed	3	43	4
W1118	NFfed	3	43	4
W1118	NFfed	3	0	0
W1118	NFfed	3	17	2
W1118	NFfed	3	30	3
W1118	NFfed	3	0	0
W1118	NFfed	3	16	3
W1118	HSDfed	3	0	0
W1118	HSDfed	3	6	1
W1118	HSDfed	3	0	0
W1118	HSDfed	3	0	0
W1118	HSDfed	3	48	2
W1118	HSDfed	3	9	1
W1118	HSDfed	3	29	2
W1118	HSDfed	3	20	2
W1118	HSDfed	3	63	6
W1118	HSDfed	3	23	1
W1118	HSDfed	3	170	16
W1118	HSDfed	3	7	1
W1118	HSDfed	3	7	1
W1118	HSDfed	3	0	0
W1118	HSDfed	3	66	4
W1118	HSDfed	3	101	6
W1118	HSDfed	3	54	4
W1118	HSDfed	3	0	0
W1118	NFstv	3	565	26
W1118	NFstv	3	82	6
W1118	NFstv	3	183	18
W1118	NFstv	3	79	8
W1118	NFstv	3	475	32
W1118	NFstv	3	441	30
W1118	NFstv	3	947	96
W1118	NFstv	3	296	26
W1118	NFstv	3	1007	90
W1118	NFstv	3	519	40
W1118	NFstv	3	644	65
W1118	NFstv	3	788	83
W1118	NFstv	3	947	96
W1118	NFstv	3	296	26
W1118	NFstv	3	1007	90
W1118	NFstv	3	519	40
W1118	NFstv	3	644	65
W1118	NFstv	3	788	83
W1118	HSDstv	3	175	8
W1118	HSDstv	3	43	5
W1118	HSDstv	3	320	20
W1118	HSDstv	3	5	1
W1118	HSDstv	3	60	7
W1118	HSDstv	3	63	7
W1118	HSDstv	3	366	23
W1118	HSDstv	3	160	16
W1118	HSDstv	3	167	18
W1118	HSDstv	3	654	55
W1118	HSDstv	3	169	15
W1118	HSDstv	3	376	40
W1118	HSDstv	3	366	23
W1118	HSDstv	3	160	16
W1118	HSDstv	3	167	18
W1118	HSDstv	3	654	55
W1118	HSDstv	3	169	15
W1118	HSDstv	3	376	40
W1118	NFfed	5	0	0
W1118	NFfed	5	12	2
W1118	NFfed	5	0	0
W1118	NFfed	5	20	3
W1118	NFfed	5	11	1
W1118	NFfed	5	7	1
W1118	NFfed	5	5	1
W1118	NFfed	5	10	1
W1118	NFfed	5	5	1
W1118	NFfed	5	10	1
W1118	NFfed	5	0	0
W1118	NFfed	5	32	3
W1118	NFfed	5	22	3
W1118	NFfed	5	0	0
W1118	NFfed	5	15	2
W1118	NFfed	5	54	7
W1118	NFfed	5	0	0
W1118	NFfed	5	0	0
W1118	HSDfed	5	0	0
W1118	HSDfed	5	37	2
W1118	HSDfed	5	42	2
W1118	HSDfed	5	5	1
W1118	HSDfed	5	231	1
W1118	HSDfed	5	0	0
W1118	HSDfed	5	13	2
W1118	HSDfed	5	79	5
W1118	HSDfed	5	0	0
W1118	HSDfed	5	0	0
W1118	HSDfed	5	0	0
W1118	HSDfed	5	114	6
W1118	HSDfed	5	70	8
W1118	HSDfed	5	43	4
W1118	HSDfed	5	276	15
W1118	HSDfed	5	169	7
W1118	HSDfed	5	6	1
W1118	HSDfed	5	34	4
W1118	NFstv	5	277	22
W1118	NFstv	5	441	34
W1118	NFstv	5	292	27
W1118	NFstv	5	365	20
W1118	NFstv	5	523	41
W1118	NFstv	5	162	15
W1118	NFstv	5	789	43
W1118	NFstv	5	549	38
W1118	NFstv	5	757	36
W1118	NFstv	5	991	44
W1118	NFstv	5	859	38
W1118	NFstv	5	388	28
W1118	NFstv	5	179	21
W1118	NFstv	5	207	16
W1118	NFstv	5	441	29
W1118	NFstv	5	821	82
W1118	NFstv	5	118	16
W1118	NFstv	5	730	60
W1118	HSDstv	5	93	9
W1118	HSDstv	5	257	17
W1118	HSDstv	5	89	7
W1118	HSDstv	5	84	7
W1118	HSDstv	5	31	4
W1118	HSDstv	5	378	25
W1118	HSDstv	5	97	6
W1118	HSDstv	5	106	9
W1118	HSDstv	5	66	9
W1118	HSDstv	5	172	5
W1118	HSDstv	5	70	6
W1118	HSDstv	5	134	15
W1118	HSDstv	5	77	10
W1118	HSDstv	5	129	8
W1118	HSDstv	5	134	14
W1118	HSDstv	5	332	19
W1118	HSDstv	5	22	3
W1118	HSDstv	5	282	21
W1118	NFfed	7	13	2
W1118	NFfed	7	0	0
W1118	NFfed	7	0	0
W1118	NFfed	7	10	1
W1118	NFfed	7	13	2
W1118	NFfed	7	20	2
W1118	NFfed	7	0	0
W1118	NFfed	7	0	0
W1118	NFfed	7	20	3
W1118	NFfed	7	0	0
W1118	NFfed	7	0	0
W1118	NFfed	7	20	2
W1118	NFfed	7	21	4
W1118	NFfed	7	0	0
W1118	NFfed	7	11	1
W1118	NFfed	7	209	7
W1118	NFfed	7	56	3
W1118	NFfed	7	53	6
W1118	HSDfed	7	29	3
W1118	HSDfed	7	5	1
W1118	HSDfed	7	21	2
W1118	HSDfed	7	35	2
W1118	HSDfed	7	12	2
W1118	HSDfed	7	33	2
W1118	HSDfed	7	18	2
W1118	HSDfed	7	0	0
W1118	HSDfed	7	10	2
W1118	HSDfed	7	0	0
W1118	HSDfed	7	94	4
W1118	HSDfed	7	6	1
W1118	HSDfed	7	20	3
W1118	HSDfed	7	91	5
W1118	HSDfed	7	28	3
W1118	HSDfed	7	68	5
W1118	HSDfed	7	14	1
W1118	HSDfed	7	227	1
W1118	NFstv	7	544	38
W1118	NFstv	7	135	14
W1118	NFstv	7	592	25
W1118	NFstv	7	237	24
W1118	NFstv	7	261	20
W1118	NFstv	7	573	25
W1118	NFstv	7	885	39
W1118	NFstv	7	203	17
W1118	NFstv	7	458	26
W1118	NFstv	7	428	36
W1118	NFstv	7	700	37
W1118	NFstv	7	224	17
W1118	NFstv	7	6	1
W1118	NFstv	7	528	17
W1118	NFstv	7	45	6
W1118	NFstv	7	65	9
W1118	NFstv	7	394	21
W1118	NFstv	7	267	29
W1118	HSDstv	7	69	7
W1118	HSDstv	7	24	3
W1118	HSDstv	7	222	17
W1118	HSDstv	7	176	19
W1118	HSDstv	7	136	12
W1118	HSDstv	7	347	22
W1118	HSDstv	7	157	19
W1118	HSDstv	7	16	3
W1118	HSDstv	7	48	4
W1118	HSDstv	7	79	8
W1118	HSDstv	7	132	11
W1118	HSDstv	7	219	20
W1118	HSDstv	7	87	11
W1118	HSDstv	7	105	10
W1118	HSDstv	7	78	10
W1118	HSDstv	7	39	5
W1118	HSDstv	7	47	5
W1118	HSDstv	7	34	4
W1118	NFfed	10	14	2
W1118	NFfed	10	29	1
W1118	NFfed	10	5	1
W1118	NFfed	10	14	2
W1118	NFfed	10	0	0
W1118	NFfed	10	13	1
W1118	NFfed	10	13	1
W1118	NFfed	10	255	4
W1118	NFfed	10	15	1
W1118	NFfed	10	0	0
W1118	NFfed	10	0	0
W1118	NFfed	10	0	0
W1118	NFfed	10	0	0
W1118	NFfed	10	15	2
W1118	NFfed	10	7	1
W1118	NFfed	10	11	2
W1118	NFfed	10	0	0
W1118	NFfed	10	6	1
W1118	HSDfed	10	128	13
W1118	HSDfed	10	7	1
W1118	HSDfed	10	76	5
W1118	HSDfed	10	151	8
W1118	HSDfed	10	223	13
W1118	HSDfed	10	8	1
W1118	HSDfed	10	46	4
W1118	HSDfed	10	30	1
W1118	HSDfed	10	65	4
W1118	HSDfed	10	101	3
W1118	HSDfed	10	0	0
W1118	HSDfed	10	47	6
W1118	HSDfed	10	78	5
W1118	HSDfed	10	99	8
W1118	HSDfed	10	35	1
W1118	HSDfed	10	18	3
W1118	HSDfed	10	126	8
W1118	HSDfed	10	0	0
W1118	NFstv	10	569	40
W1118	NFstv	10	271	24
W1118	NFstv	10	1150	72
W1118	NFstv	10	283	32
W1118	NFstv	10	544	44
W1118	NFstv	10	365	25
W1118	NFstv	10	1264	87
W1118	NFstv	10	1290	58
W1118	NFstv	10	682	57
W1118	NFstv	10	756	58
W1118	NFstv	10	604	53
W1118	NFstv	10	1024	73
W1118	NFstv	10	445	31
W1118	NFstv	10	206	23
W1118	NFstv	10	418	33
W1118	NFstv	10	429	36
W1118	NFstv	10	617	41
W1118	NFstv	10	345	34
W1118	HSDstv	10	512	30
W1118	HSDstv	10	65	8
W1118	HSDstv	10	98	8
W1118	HSDstv	10	396	35
W1118	HSDstv	10	48	4
W1118	HSDstv	10	150	8
W1118	HSDstv	10	216	12
W1118	HSDstv	10	231	18
W1118	HSDstv	10	441	24
W1118	HSDstv	10	175	14
W1118	HSDstv	10	468	28
W1118	HSDstv	10	367	32
W1118	HSDstv	10	23	3
W1118	HSDstv	10	0	0
W1118	HSDstv	10	138	15
W1118	HSDstv	10	120	9
W1118	HSDstv	10	272	24
W1118	HSDstv	10	200	13
W1118	NFfed	14	0	0
W1118	NFfed	14	10	1
W1118	NFfed	14	32	2
W1118	NFfed	14	11	1
W1118	NFfed	14	0	0
W1118	NFfed	14	26	3
W1118	NFfed	14	16	1
W1118	NFfed	14	6	1
W1118	NFfed	14	0	0
W1118	NFfed	14	8	1
W1118	NFfed	14	9	1
W1118	NFfed	14	0	0
W1118	NFfed	14	44	4
W1118	NFfed	14	56	2
W1118	NFfed	14	6	1
W1118	NFfed	14	37	5
W1118	NFfed	14	0	0
W1118	NFfed	14	33	5
W1118	HSDfed	14	34	4
W1118	HSDfed	14	124	5
W1118	HSDfed	14	13	2
W1118	HSDfed	14	83	9
W1118	HSDfed	14	49	5
W1118	HSDfed	14	57	3
W1118	HSDfed	14	180	5
W1118	HSDfed	14	53	3
W1118	HSDfed	14	74	4
W1118	HSDfed	14	233	11
W1118	HSDfed	14	98	8
W1118	HSDfed	14	117	8
W1118	HSDfed	14	122	8
W1118	HSDfed	14	14	2
W1118	HSDfed	14	107	3
W1118	HSDfed	14	81	2
W1118	HSDfed	14	4107	383
W1118	HSDfed	14	0	0
W1118	NFstv	14	811	49
W1118	NFstv	14	526	21
W1118	NFstv	14	626	33
W1118	NFstv	14	879	31
W1118	NFstv	14	688	35
W1118	NFstv	14	538	24
W1118	NFstv	14	575	51
W1118	NFstv	14	1229	55
W1118	NFstv	14	580	39
W1118	NFstv	14	373	36
W1118	NFstv	14	874	47
W1118	NFstv	14	384	22
W1118	NFstv	14	0	0
W1118	NFstv	14	1160	44
W1118	NFstv	14	594	34
W1118	NFstv	14	959	41
W1118	NFstv	14	1207	72
W1118	NFstv	14	926	59
W1118	HSDstv	14	107	10
W1118	HSDstv	14	120	10
W1118	HSDstv	14	138	13
W1118	HSDstv	14	77	8
W1118	HSDstv	14	99	8
W1118	HSDstv	14	630	47
W1118	HSDstv	14	161	8
W1118	HSDstv	14	223	12
W1118	HSDstv	14	7	1
W1118	HSDstv	14	210	8
W1118	HSDstv	14	46	5
W1118	HSDstv	14	224	10
W1118	HSDstv	14	91	3
W1118	HSDstv	14	1041	46
W1118	HSDstv	14	399	32
W1118	HSDstv	14	818	44
W1118	HSDstv	14	628	34
W1118	HSDstv	14	430	22
W1118	NFfed	21	18	1
W1118	NFfed	21	0	0
W1118	NFfed	21	14	1
W1118	NFfed	21	0	0
W1118	NFfed	21	18	2
W1118	NFfed	21	21	2
W1118	NFfed	21	0	0
W1118	NFfed	21	63	6
W1118	NFfed	21	34	2
W1118	NFfed	21	20	3
W1118	NFfed	21	15	2
W1118	NFfed	21	53	4
W1118	NFfed	21	225	16
W1118	NFfed	21	297	21
W1118	NFfed	21	97	6
W1118	NFfed	21	319	5
W1118	NFfed	21	180	6
W1118	NFfed	21	134	5
W1118	HSDfed	21	29	2
W1118	HSDfed	21	0	0
W1118	HSDfed	21	75	6
W1118	HSDfed	21	48	3
W1118	HSDfed	21	82	7
W1118	HSDfed	21	85	8
W1118	HSDfed	21	165	8
W1118	HSDfed	21	60	4
W1118	HSDfed	21	102	4
W1118	HSDfed	21	453	18
W1118	HSDfed	21	27	3
W1118	HSDfed	21	80	3
W1118	HSDfed	21	24	3
W1118	HSDfed	21	46	1
W1118	HSDfed	21	271	3
W1118	HSDfed	21	584	16
W1118	HSDfed	21	368	8
W1118	HSDfed	21	5	1
W1118	NFstv	21	323	21
W1118	NFstv	21	390	35
W1118	NFstv	21	494	25
W1118	NFstv	21	651	30
W1118	NFstv	21	615	44
W1118	NFstv	21	523	38
W1118	NFstv	21	472	28
W1118	NFstv	21	175	18
W1118	NFstv	21	655	40
W1118	NFstv	21	542	44
W1118	NFstv	21	573	37
W1118	NFstv	21	195	18
W1118	NFstv	21	845	83
W1118	NFstv	21	814	32
W1118	NFstv	21	547	30
W1118	NFstv	21	790	58
W1118	NFstv	21	1092	66
W1118	NFstv	21	842	45
W1118	HSDstv	21	14	2
W1118	HSDstv	21	45	6
W1118	HSDstv	21	31	5
W1118	HSDstv	21	0	0
W1118	HSDstv	21	47	4
W1118	HSDstv	21	109	13
W1118	HSDstv	21	171	13
W1118	HSDstv	21	48	6
W1118	HSDstv	21	100	10
W1118	HSDstv	21	41	4
W1118	HSDstv	21	7	1
W1118	HSDstv	21	6	1
W1118	HSDstv	21	203	23
W1118	HSDstv	21	69	5
W1118	HSDstv	21	418	28
W1118	HSDstv	21	1410	118
W1118	HSDstv	21	323	23
W1118	HSDstv	21	277	21
W1118	NFfed	24	43	5
W1118	NFfed	24	0	0
W1118	NFfed	24	5	1
W1118	NFfed	24	22	4
W1118	NFfed	24	84	10
W1118	NFfed	24	30	4
W1118	NFfed	24	0	0
W1118	NFfed	24	0	0
W1118	NFfed	24	0	0
W1118	NFfed	24	5	1
W1118	NFfed	24	90	7
W1118	NFfed	24	7	1
W1118	NFfed	24	128	6
W1118	NFfed	24	63	9
W1118	NFfed	24	49	2
W1118	NFfed	24	43	4
W1118	NFfed	24	302	13
W1118	NFfed	24	5	1
W1118	NFstv	24	10	2
W1118	NFstv	24	358	24
W1118	NFstv	24	49	8
W1118	NFstv	24	108	8
W1118	NFstv	24	0	0
W1118	NFstv	24	124	11
W1118	NFstv	24	119	5
W1118	NFstv	24	277	15
W1118	NFstv	24	83	5
W1118	NFstv	24	59	8
W1118	NFstv	24	76	1
W1118	NFstv	24	153	18
W1118	NFstv	24	534	32
W1118	NFstv	24	22	3
W1118	NFstv	24	147	8
W1118	NFstv	24	297	23
W1118	NFstv	24	83	8
W1118	NFstv	24	170	19
W1118	HSDfed	24	17	1
W1118	HSDfed	24	127	6
W1118	HSDfed	24	13	2
W1118	HSDfed	24	14	1
W1118	HSDfed	24	49	2
W1118	HSDfed	24	18	3
W1118	HSDfed	24	5	1
W1118	HSDfed	24	342	19
W1118	HSDfed	24	40	4
W1118	HSDfed	24	5	1
W1118	HSDfed	24	30	4
W1118	HSDfed	24	0	0
W1118	HSDfed	24	15	2
W1118	HSDfed	24	21	3
W1118	HSDfed	24	0	0
W1118	HSDfed	24	128	13
W1118	HSDfed	24	51	2
W1118	HSDfed	24	0	0
W1118	HSDstv	24	53	4
W1118	HSDstv	24	35	5
W1118	HSDstv	24	96	5
W1118	HSDstv	24	0	0
W1118	HSDstv	24	34	5
W1118	HSDstv	24	28	4
W1118	HSDstv	24	91	8
W1118	HSDstv	24	11	1
W1118	HSDstv	24	48	2
W1118	HSDstv	24	77	3
W1118	HSDstv	24	5	1
W1118	HSDstv	24	64	3
W1118	HSDstv	24	0	0
W1118	HSDstv	24	75	7
W1118	HSDstv	24	0	0
W1118	HSDstv	24	10	2
W1118	HSDstv	24	0	0
W1118	HSDstv	24	0	0
W1118	NFfed	28	0	0
W1118	NFfed	28	358	4
W1118	NFfed	28	0	0
W1118	NFfed	28	0	0
W1118	NFfed	28	17	1
W1118	NFfed	28	32	1
W1118	NFfed	28	76	5
W1118	NFfed	28	55	5
W1118	NFfed	28	51	5
W1118	NFfed	28	0	0
W1118	NFfed	28	0	0
W1118	NFfed	28	8	1
W1118	NFfed	28	47	4
W1118	NFfed	28	26	1
W1118	NFfed	28	0	0
W1118	NFfed	28	6	1
W1118	NFfed	28	30	1
W1118	NFfed	28	64	4
W1118	HSDfed	28	121	3
W1118	HSDfed	28	148	10
W1118	HSDfed	28	23	3
W1118	HSDfed	28	23	4
W1118	HSDfed	28	476	20
W1118	HSDfed	28	80	7
W1118	HSDfed	28	122	14
W1118	HSDfed	28	187	7
W1118	HSDfed	28	325	17
W1118	HSDfed	28	60	2
W1118	HSDfed	28	177	7
W1118	HSDfed	28	117	9
W1118	HSDfed	28	1964	122
W1118	HSDfed	28	140	6
W1118	HSDfed	28	266	30
W1118	HSDfed	28	447	17
W1118	HSDfed	28	365	24
W1118	HSDfed	28	272	17
W1118	NFstv	28	605	51
W1118	NFstv	28	423	20
W1118	NFstv	28	267	24
W1118	NFstv	28	915	26
W1118	NFstv	28	261	25
W1118	NFstv	28	373	12
W1118	NFstv	28	0	0
W1118	NFstv	28	511	57
W1118	NFstv	28	584	51
W1118	NFstv	28	899	68
W1118	NFstv	28	739	43
W1118	NFstv	28	735	52
W1118	NFstv	28	168	24
W1118	NFstv	28	758	53
W1118	NFstv	28	690	57
W1118	NFstv	28	224	24
W1118	NFstv	28	242	25
W1118	NFstv	28	370	31
W1118	HSDstv	28	176	6
W1118	HSDstv	28	63	3
W1118	HSDstv	28	112	3
W1118	HSDstv	28	5	1
W1118	HSDstv	28	37	3
W1118	HSDstv	28	366	14
W1118	HSDstv	28	239	15
W1118	HSDstv	28	180	9
W1118	HSDstv	28	133	13
W1118	HSDstv	28	145	7
W1118	HSDstv	28	195	8
W1118	HSDstv	28	5	1
W1118	HSDstv	28	67	4
W1118	HSDstv	28	11	1
W1118	HSDstv	28	0	0
W1118	HSDstv	28	0	0
W1118	HSDstv	28	15	2
W1118	HSDstv	28	5	1
