# Supplementary material for: Fat body phospholipid state dictates hunger-driven feeding behavior
Source: eLife journal article supplement (doi:10.7554/elife.80282), 2022-10-06
Supplement: supp [file elife-80282-supp-v1.zip › elife_poa_e80282_Figure_1_source_data_2.xlsx]

## Sheet: Sheet1
E-G. Change in w1118 TAG levels after 16 hours of starvation
Diet	Tag_per_fly	Day	Replicate
NF_fed	0.214333	3	1
NF_fed	0.365333	3	2
NF_fed	0.336333	3	3
NF_fed	0.132	3	4
NF_fed	0.170333	3	5
NF_fed	0.231333	3	6
NF_fed	0.234	3	7
NF_fed	0.138667	3	8
NF_fed	0.128	3	9
NF_stv	0.0575	3	1
NF_stv	0.188	3	2
NF_stv	0.203	3	3
NF_stv	0.093	3	4
NF_stv	0.0663333	3	5
NF_stv	0.0773333	3	6
NF_stv	0.053	3	7
NF_stv	0.075	3	8
HSD_fed	0.709667	3	1
HSD_fed	0.793333	3	2
HSD_fed	0.543333	3	3
HSD_fed	0.463	3	4
HSD_fed	0.523	3	5
HSD_fed	0.595	3	6
HSD_fed	0.48	3	7
HSD_fed	0.448667	3	8
HSD_fed	0.481	3	9
HSD_stv	0.315	3	1
HSD_stv	0.611333	3	2
HSD_stv	0.475	3	3
HSD_stv	0.101	3	4
HSD_stv	0.289	3	5
HSD_stv	0.418667	3	6
HSD_stv	0.339	3	7
HSD_stv	0.268333	3	8
HSD_stv	0.309667	3	9
NF_fed	0.611333	5	1
NF_fed	0.469667	5	2
NF_fed	0.645667	5	3
NF_fed	0.388667	5	4
NF_fed	0.415667	5	5
NF_fed	0.665	5	6
NF_fed	0.0793333	5	7
NF_fed	0.0986667	5	8
NF_fed	0.139333	5	9
NF_stv	0.0206667	5	1
NF_stv	0.135333	5	2
NF_stv	0.145333	5	3
NF_stv	0.103333	5	4
NF_stv	0.147333	5	5
NF_stv	0.191333	5	6
NF_stv	0.0766667	5	7
NF_stv	0.0553333	5	8
NF_stv	0.054	5	9
HSD_fed	0.587333	5	1
HSD_fed	0.708333	5	2
HSD_fed	0.838667	5	3
HSD_fed	0.431667	5	4
HSD_fed	0.505	5	5
HSD_fed	0.644333	5	6
HSD_fed	0.532667	5	7
HSD_fed	0.597333	5	8
HSD_fed	0.646333	5	9
HSD_stv	0.275667	5	1
HSD_stv	0.524667	5	2
HSD_stv	0.666	5	3
HSD_stv	0.337333	5	4
HSD_stv	0.326333	5	5
HSD_stv	0.532667	5	6
HSD_stv	0.310333	5	7
HSD_stv	0.288	5	8
HSD_stv	0.308667	5	9
NF_fed	0.311333	7	1
NF_fed	0.155	7	2
NF_fed	0.210667	7	3
NF_fed	0.328333	7	4
NF_fed	0.181667	7	5
NF_fed	0.303	7	6
NF_fed	0.124	7	7
NF_fed	0.081	7	8
NF_fed	0.0953333	7	9
NF_stv	0.127	7	1
NF_stv	0.131667	7	2
NF_stv	0.0733333	7	3
NF_stv	0.152	7	4
NF_stv	0.2525	7	5
NF_stv	0.0923333	7	6
NF_stv	0.07	7	7
NF_stv	0.0456667	7	8
HSD_fed	0.736667	7	1
HSD_fed	0.608667	7	2
HSD_fed	0.643667	7	3
HSD_fed	0.621667	7	4
HSD_fed	1.1445	7	5
HSD_fed	0.725	7	6
HSD_fed	0.620333	7	7
HSD_fed	0.497667	7	8
HSD_stv	0.689	7	1
HSD_stv	0.524333	7	2
HSD_stv	0.651	7	3
HSD_stv	0.685667	7	4
HSD_stv	0.583667	7	5
HSD_stv	0.387333	7	6
HSD_stv	0.318333	7	7
HSD_stv	0.453333	7	8
NF_fed	0.385333	10	1
NF_fed	0.347	10	2
NF_fed	0.454	10	3
NF_fed	0.343667	10	4
NF_fed	0.277667	10	5
NF_fed	0.362	10	6
NF_fed	0.129	10	7
NF_fed	0.081	10	8
NF_fed	0.15	10	9
NF_stv	0.093	10	1
NF_stv	0.0506667	10	2
NF_stv	0.084	10	3
NF_stv	0.0983333	10	4
NF_stv	0.151	10	5
NF_stv	0.113667	10	6
NF_stv	0.165667	10	7
NF_stv	0.0796667	10	8
HSD_fed	0.49	10	1
HSD_fed	0.591667	10	2
HSD_fed	0.676667	10	3
HSD_fed	0.468333	10	4
HSD_fed	0.579333	10	5
HSD_fed	0.51	10	6
HSD_fed	0.5425	10	7
HSD_fed	0.682333	10	8
HSD_fed	0.810667	10	9
HSD_stv	0.357	10	1
HSD_stv	0.305	10	2
HSD_stv	0.499333	10	3
HSD_stv	0.349	10	4
HSD_stv	0.302	10	5
HSD_stv	0.336333	10	6
HSD_stv	0.39	10	7
HSD_stv	0.493667	10	8
HSD_stv	0.326	10	9
NF_fed	0.075	14	1
NF_fed	0.0723333	14	2
NF_fed	0.0766667	14	3
NF_fed	0.205667	14	4
NF_fed	0.273667	14	5
NF_fed	0.267667	14	6
NF_fed	0.403333	14	7
NF_fed	0.317	14	8
NF_fed	0.479	14	9
NF_stv	0.0563333	14	1
NF_stv	0.0576667	14	2
NF_stv	0.053	14	3
NF_stv	0.249333	14	4
NF_stv	0.038	14	5
NF_stv	0.117667	14	6
NF_stv	0.127333	14	7
NF_stv	0.065	14	8
NF_stv	0.189	14	9
HSD_fed	0.741	14	1
HSD_fed	0.7	14	2
HSD_fed	0.737667	14	3
HSD_fed	1.04867	14	4
HSD_fed	2.184	14	5
HSD_fed	0.693667	14	6
HSD_fed	0.562667	14	7
HSD_fed	0.817	14	8
HSD_fed		14	9
HSD_stv	0.9015	14	1
HSD_stv	0.537333	14	2
HSD_stv	0.628333	14	3
HSD_stv	0.856667	14	4
HSD_stv	0.384	14	5
HSD_stv	0.586	14	6
HSD_stv	0.585333	14	7
HSD_stv	0.641	14	8
HSD_stv	0.566333	14	9
NF_fed	0.407667	21	1
NF_fed	0.358667	21	2
NF_fed	0.376	21	3
NF_fed	0.801333	21	4
NF_fed	0.446333	21	5
NF_fed	0.562333	21	6
NF_fed	0.342667	21	7
NF_fed	0.343667	21	8
NF_stv	0.123	21	1
NF_stv	0.127	21	2
NF_stv	0.182667	21	3
NF_stv	0.112667	21	4
NF_stv	1.00733	21	5
NF_stv	0.042	21	6
NF_stv	0.124333	21	7
NF_stv	0.159	21	8
NF_stv	0.128	21	9
HSD_fed	0.616667	21	1
HSD_fed	0.610333	21	2
HSD_fed	0.767333	21	3
HSD_fed	0.552	21	4
HSD_fed	0.0256667	21	5
HSD_fed	0.929	21	6
HSD_fed	0.868333	21	7
HSD_fed	0.75	21	8
HSD_fed	0.761667	21	9
HSD_stv	0.445667	21	1
HSD_stv	0.294667	21	2
HSD_stv	0.611667	21	3
HSD_stv	0.233	21	4
HSD_stv	0.605	21	5
HSD_stv	0.470667	21	6
HSD_stv	0.733	21	7
HSD_stv	0.606	21	8
HSD_stv	0.536	21	9
NF_fed	0.227667	24	1
NF_fed	0.189333	24	2
NF_fed	0.289	24	3
NF_fed	0.196333	24	4
NF_fed	0.137667	24	5
NF_fed	0.220333	24	6
NF_fed	0.295333	24	7
NF_fed	0.258667	24	8
NF_fed	0.242667	24	9
NF_stv	0.138	24	1
NF_stv	0.046	24	2
NF_stv	0.054	24	3
NF_stv	0.100333	24	4
NF_stv	0.124333	24	5
NF_stv	0.061	24	6
NF_stv	0.0546667	24	7
NF_stv	0.0663333	24	8
NF_stv	0.0803333	24	9
HSD_fed	0.684667	24	1
HSD_fed	0.807667	24	2
HSD_fed	0.691667	24	3
HSD_fed	0.701	24	4
HSD_fed	0.744333	24	5
HSD_fed	0.780333	24	6
HSD_fed	0.832667	24	7
HSD_fed	0.771333	24	8
HSD_fed	0.785	24	9
HSD_stv	0.394667	24	1
HSD_stv	0.545333	24	2
HSD_stv	0.312667	24	3
HSD_stv	0.94	24	4
HSD_stv	0.678333	24	5
HSD_stv	0.614667	24	6
HSD_stv	0.464333	24	7
HSD_stv	0.491	24	8
HSD_stv	0.434333	24	9
NF_fed	0.354	28	1
NF_fed	0.473667	28	2
NF_fed	0.361667	28	3
NF_fed	0.282333	28	4
NF_fed	0.299	28	5
NF_fed	0.251667	28	6
NF_fed	0.479667	28	7
NF_fed	0.43	28	8
NF_fed	0.512667	28	9
NF_stv	0.0613333	28	1
NF_stv	0.0506667	28	2
NF_stv	0.296667	28	3
NF_stv	0.183667	28	4
NF_stv	0.144	28	5
NF_stv	0.134667	28	6
NF_stv	0.146333	28	7
NF_stv	0.074	28	8
HSD_fed	0.875667	28	1
HSD_fed	0.835	28	2
HSD_fed	0.892333	28	3
HSD_fed	0.795	28	4
HSD_fed	0.689333	28	5
HSD_fed	0.617333	28	6
HSD_fed	0.803	28	7
HSD_fed	0.924	28	8
HSD_fed	0.809	28	9
HSD_stv	0.394667	28	1
HSD_stv	0.545333	28	2
HSD_stv	0.312667	28	3
HSD_stv	0.94	28	4
HSD_stv	0.678333	28	5
HSD_stv	0.614667	28	6
HSD_stv	0.464333	28	7
HSD_stv	0.491	28	8
HSD_stv	0.434333	28	9
