# Supplementary material for: Fat body phospholipid state dictates hunger-driven feeding behavior
Source: eLife journal article supplement (doi:10.7554/elife.80282), 2022-10-06
Supplement: supp [file elife-80282-supp-v1.zip › elife_poa_e80282_Figure_1_source_data_3.xlsx]

## Sheet: Sheet1
H. w1118 Hunger Driven Feeding Responses on HSD
HSD Fed	HSD 16hr Stv	HSD 20hr Stv	HSD 24hr Stv	HSD 32hr Stv
1.43541	0.388293	0.687469	0.238704	0.153225
0.548566	0.730209	0.302814	0.20665	0.484456
0.837057	0.890482	0.548566	-0.07116	0.345553
1.17897	0.879797	0.356238	0.249389	-0.24211
