# Supplementary material for: Fat body phospholipid state dictates hunger-driven feeding behavior
Source: eLife journal article supplement (doi:10.7554/elife.80282), 2022-10-06
Supplement: supp [file elife-80282-supp-v1.zip › elife_poa_e80282_Figure_1_source_data_5.xlsx]

## Sheet: Sheet1
J. Normalized TAG levels of 14 days HSD-fed w1118 flies
HSD Fed	16 hr	20 hr	24 hr	32 hr
1.40168	0.632824	0.79448	0.510596	0.514539
0.622967	0.84968	0.620996	0.518482	0.747166
0.843765	0.97585	0.831937	0.313455	0.646624
1.13159	1.01725	0.595367	0.540168	0.18137
