# Supplementary material for: Fat body phospholipid state dictates hunger-driven feeding behavior
Source: eLife journal article supplement (doi:10.7554/elife.80282), 2022-10-06
Supplement: supp [file elife-80282-supp-v1.zip › elife_poa_e80282_Figure_2_figure_supplement_2_source_data_1.xlsx]

## Sheet: ND
FOXO accumulation in w1118 (6 hours after diet treatment)
ID	NucVol	NucMI	q97	NbSlices	FirstSlice
112221_W1118_6hrsND_RbFOXO-488_mLamin-647_1_1_01	153.036	11738.3	20935.3	20	7
112221_W1118_6hrsND_RbFOXO-488_mLamin-647_1_1_02	54.3074	6056.3	9868	14	24
112221_W1118_6hrsND_RbFOXO-488_mLamin-647_1_1_03	17.1298	5390.06	10275.6	6	26
112221_W1118_6hrsND_RbFOXO-488_mLamin-647_1_1_04	112.192	11043.4	20307.1	24	10
112221_W1118_6hrsND_RbFOXO-488_mLamin-647_1_1_05	114.815	12780.7	24533.7	21	6
112221_W1118_6hrsND_RbFOXO-488_mLamin-647_1_1_06	33.9336	5364.85	8269.9	4	31
112221_W1118_6hrsND_RbFOXO-488_mLamin-647_1_1_07	520.589	10403.2	21596	28	1
112221_W1118_6hrsND_RbFOXO-488_mLamin-647_1_1_08	101.893	9643.17	16754	22	9
112221_W1118_6hrsND_RbFOXO-488_mLamin-647_1_1_09	161.81	7714.83	14407.4	18	19
112221_W1118_6hrsND_RbFOXO-488_mLamin-647_1_1_10	137.286	9136.83	16401	17	19
112221_W1118_6hrsND_RbFOXO-488_mLamin-647_1_1_11	135.288	9613.42	16606	26	16
112221_W1118_6hrsND_RbFOXO-488_mLamin-647_1_1_12	102.649	8471.47	15094.2	19	10
112221_W1118_6hrsND_RbFOXO-488_mLamin-647_1_1_13	100.424	12007.4	21056.4	18	8
112221_W1118_6hrsND_RbFOXO-488_mLamin-647_1_1_14	39.0828	6615.7	11061.8	7	37
112221_W1118_6hrsND_RbFOXO-488_mLamin-647_1_1_15	63.6173	6234.09	10309.5	11	26
112221_W1118_6hrsND_RbFOXO-488_mLamin-647_1_1_16	43.4391	10087.3	18011.9	11	10
112221_W1118_6hrsND_RbFOXO-488_mLamin-647_1_1_17	110.455	10709.4	20337.7	21	9
112221_W1118_6hrsND_RbFOXO-488_mLamin-647_1_1_18	110.874	12474	21300.2	20	3
112221_W1118_6hrsND_RbFOXO-488_mLamin-647_1_1_19	61.3722	6505.68	10571	14	27
112221_W1118_6hrsND_RbFOXO-488_mLamin-647_1_1_20	31.6816	4030.81	6406.63	5	45
112221_W1118_6hrsND_RbFOXO-488_mLamin-647_1_1_21	99.2535	9526.82	16983.3	18	13
112221_W1118_6hrsND_RbFOXO-488_mLamin-647_1_1_22	94.2038	9892.6	17298.5	17	14
112221_W1118_6hrsND_RbFOXO-488_mLamin-647_1_1_23	58.3925	6876.31	12752.8	10	36
112221_W1118_6hrsND_RbFOXO-488_mLamin-647_1_1_24	56.0101	6419.06	11095	9	30
112221_W1118_6hrsND_RbFOXO-488_mLamin-647_1_1_25	172.534	8993.27	16243.1	22	9
112221_W1118_6hrsND_RbFOXO-488_mLamin-647_1_1_26	106.033	9711.8	16752.9	19	4
112221_W1118_6hrsND_RbFOXO-488_mLamin-647_1_1_27	89.7652	8470.33	14727	18	16
112221_W1118_6hrsND_RbFOXO-488_mLamin-647_1_1_28	99.662	9965.43	18743.5	21	6
112221_W1118_6hrsND_RbFOXO-488_mLamin-647_1_1_29	49.1445	7983.63	14256	12	7
112221_W1118_6hrsND_RbFOXO-488_mLamin-647_1_1_30	186.688	9381.05	17305	21	16
112221_W1118_6hrsND_RbFOXO-488_mLamin-647_1_1_31	86.5795	7486.7	13512.2	11	26
112221_W1118_6hrsND_RbFOXO-488_mLamin-647_2_1_01	33.0204	6988.42	12547	7	14
112221_W1118_6hrsND_RbFOXO-488_mLamin-647_2_1_02	80.9016	7090.17	12890	19	13
112221_W1118_6hrsND_RbFOXO-488_mLamin-647_2_1_03	40.6654	4025.56	6703.12	10	30
112221_W1118_6hrsND_RbFOXO-488_mLamin-647_2_1_04	18.4206	4482.61	6775.56	5	34
112221_W1118_6hrsND_RbFOXO-488_mLamin-647_2_1_05	170.406	10685.3	19835	18	7
112221_W1118_6hrsND_RbFOXO-488_mLamin-647_2_1_06	103.383	8666.62	15660	19	5
112221_W1118_6hrsND_RbFOXO-488_mLamin-647_2_1_07	84.41	8046.11	14278.8	19	11
112221_W1118_6hrsND_RbFOXO-488_mLamin-647_2_1_08	89.6313	8599.19	16270.8	20	9
112221_W1118_6hrsND_RbFOXO-488_mLamin-647_2_1_09	118.817	8732.3	15858.6	13	11
112221_W1118_6hrsND_RbFOXO-488_mLamin-647_2_1_10	4.68582	7505.94	12352.2	3	18
112221_W1118_6hrsND_RbFOXO-488_mLamin-647_2_1_11	44.5719	5891.06	9173.94	10	25
112221_W1118_6hrsND_RbFOXO-488_mLamin-647_2_1_12	98.3953	8081.67	14570	21	12
112221_W1118_6hrsND_RbFOXO-488_mLamin-647_2_1_13	124.066	10180.2	17330.3	18	1
112221_W1118_6hrsND_RbFOXO-488_mLamin-647_2_1_14	95.0311	9647.88	17980	20	5
112221_W1118_6hrsND_RbFOXO-488_mLamin-647_2_1_15	121.059	9702.21	16102.1	20	4
112221_W1118_6hrsND_RbFOXO-488_mLamin-647_2_1_16	103.699	9865.57	17829.9	18	8
112221_W1118_6hrsND_RbFOXO-488_mLamin-647_2_1_17	50.3494	11086.5	21066	8	13
112221_W1118_6hrsND_RbFOXO-488_mLamin-647_2_1_18	128.223	6351.66	10557.8	19	15
112221_W1118_6hrsND_RbFOXO-488_mLamin-647_2_1_19	6.18253	4788.52	7400.82	2	32
112221_W1118_6hrsND_RbFOXO-488_mLamin-647_2_1_20	128.439	8037.08	14657.2	21	8
112221_W1118_6hrsND_RbFOXO-488_mLamin-647_2_1_21	68.5777	7284.63	11661.4	13	12
112221_W1118_6hrsND_RbFOXO-488_mLamin-647_2_1_22	86.3117	9248.47	16398.6	18	10
112221_W1118_6hrsND_RbFOXO-488_mLamin-647_2_1_23	42.5465	7107.14	11260.7	10	22
112221_W1118_6hrsND_RbFOXO-488_mLamin-647_2_1_24	119.112	10388.4	16781.9	20	5
112221_W1118_6hrsND_RbFOXO-488_mLamin-647_2_1_25	159.603	11356	23473.7	23	1
112221_W1118_6hrsND_RbFOXO-488_mLamin-647_2_1_26	103.414	6900.04	11146	12	17
112221_W1118_6hrsND_RbFOXO-488_mLamin-647_2_1_27	190.876	10995.1	21072.4	23	1
112221_W1118_6hrsND_RbFOXO-488_mLamin-647_2_1_28	104.056	6534.01	11419.1	17	22
112221_W1118_6hrsND_RbFOXO-488_mLamin-647_2_1_29	185.936	9466.91	18544.6	22	6
112221_W1118_6hrsND_RbFOXO-488_mLamin-647_2_1_30	70.2529	6311.98	9320	13	19
112221_W1118_6hrsND_RbFOXO-488_mLamin-647_2_1_31	164.416	10611.2	18673	20	2
112221_W1118_6hrsND_RbFOXO-488_mLamin-647_2_1_32	85.8964	6022.03	10602	15	13
112221_W1118_6hrsND_RbFOXO-488_mLamin-647_2_1_33	16.4501	3849.33	6707.44	4	34
112221_W1118_6hrsND_RbFOXO-488_mLamin-647_3_1_01	4.49358	7434.23	12921.7	2	19
112221_W1118_6hrsND_RbFOXO-488_mLamin-647_3_1_02	63.0543	9271.01	14583.1	14	16
112221_W1118_6hrsND_RbFOXO-488_mLamin-647_3_1_03	135.834	13299.7	23454.6	19	3
112221_W1118_6hrsND_RbFOXO-488_mLamin-647_3_1_04	82.1855	7481.41	11948.3	15	17
112221_W1118_6hrsND_RbFOXO-488_mLamin-647_3_1_05	51.0428	7684.8	13502	13	18
112221_W1118_6hrsND_RbFOXO-488_mLamin-647_3_1_06	94.3343	7276.94	12886.4	18	11
112221_W1118_6hrsND_RbFOXO-488_mLamin-647_3_1_07	94.3102	7352.5	12415.3	19	17
112221_W1118_6hrsND_RbFOXO-488_mLamin-647_3_1_08	114.149	11894.5	21692.9	15	5
112221_W1118_6hrsND_RbFOXO-488_mLamin-647_3_1_09	141.659	9373.62	18510.6	14	2
112221_W1118_6hrsND_RbFOXO-488_mLamin-647_3_1_10	66.1747	9862.65	16270.4	15	15
112221_W1118_6hrsND_RbFOXO-488_mLamin-647_3_1_11	183.536	12445.9	23169.5	17	4
112221_W1118_6hrsND_RbFOXO-488_mLamin-647_3_1_12	84.3619	9379.93	15888.2	15	13
112221_W1118_6hrsND_RbFOXO-488_mLamin-647_3_1_13	159.819	10289.6	18673	21	9
112221_W1118_6hrsND_RbFOXO-488_mLamin-647_3_1_14	108.67	11260.3	21356.7	17	1
112221_W1118_6hrsND_RbFOXO-488_mLamin-647_3_1_15	33.707	8777.38	14747.9	7	22
112221_W1118_6hrsND_RbFOXO-488_mLamin-647_3_1_16	155.703	10877.3	20125	19	8
112221_W1118_6hrsND_RbFOXO-488_mLamin-647_3_1_17	2.69477	5173.58	8220.7	2	10
112221_W1118_6hrsND_RbFOXO-488_mLamin-647_3_1_18	36.5391	3024.57	5187.54	12	34
112221_W1118_6hrsND_RbFOXO-488_mLamin-647_3_1_19	71.5368	7690.42	14582.3	11	17
112221_W1118_6hrsND_RbFOXO-488_mLamin-647_3_1_20	95.22	8961.09	15506.5	18	8
112221_W1118_6hrsND_RbFOXO-488_mLamin-647_3_1_21	78.8282	10871	20763.4	17	7
112221_W1118_6hrsND_RbFOXO-488_mLamin-647_3_1_22	163.585	7754.18	13770.8	21	8
112221_W1118_6hrsND_RbFOXO-488_mLamin-647_3_1_23	37.3458	4183.02	6690.13	9	34
112221_W1118_6hrsND_RbFOXO-488_mLamin-647_3_1_24	125.577	10136.6	18056.1	19	9
112221_W1118_6hrsND_RbFOXO-488_mLamin-647_3_1_25	65.5637	8200.6	13701.6	19	14
112221_W1118_6hrsND_RbFOXO-488_mLamin-647_3_1_26	90.747	10359.5	18457.9	19	7
112221_W1118_6hrsND_RbFOXO-488_mLamin-647_3_1_27	63.2397	8097.47	13902.2	18	14
112221_W1118_6hrsND_RbFOXO-488_mLamin-647_3_1_28	81.7735	5817.99	10061.6	18	17
112221_W1118_6hrsND_RbFOXO-488_mLamin-647_3_1_29	138.611	10221.3	20621	14	3
112221_W1118_6hrsND_RbFOXO-488_mLamin-647_3_1_30	85.1617	7412.39	13663.5	17	10
112221_W1118_6hrsND_RbFOXO-488_mLamin-647_3_1_31	102.168	8549.62	17757.6	20	8
112221_W1118_6hrsND_RbFOXO-488_mLamin-647_3_1_32	45.1727	4636.96	7160.46	9	29
112221_W1118_6hrsND_RbFOXO-488_mLamin-647_3_1_33	24.5551	4332.23	6741.55	5	37
112221_W1118_6hrsND_RbFOXO-488_mLamin-647_3_1_34	98.5395	11100.8	22780	13	5
112221_W1118_6hrsND_RbFOXO-488_mLamin-647_3_1_35	48.6536	5396.57	10847.4	14	12
112221_W1118_6hrsND_RbFOXO-488_mLamin-647_3_1_36	57.9016	8390.24	15592.4	14	1
112221_W1118_6hrsND_RbFOXO-488_mLamin-647_4_1_01	76.7273	13233.3	21969.7	13	2
112221_W1118_6hrsND_RbFOXO-488_mLamin-647_4_1_02	94.4716	11685.2	20144.7	20	1
112221_W1118_6hrsND_RbFOXO-488_mLamin-647_4_1_03	80.04	8406.77	14163.1	13	13
112221_W1118_6hrsND_RbFOXO-488_mLamin-647_4_1_04	5.75686	5856.51	9087.8	1	28
112221_W1118_6hrsND_RbFOXO-488_mLamin-647_4_1_05	59.1512	9185.91	15055.3	13	13
112221_W1118_6hrsND_RbFOXO-488_mLamin-647_4_1_06	80.5377	10179	16543	17	1
112221_W1118_6hrsND_RbFOXO-488_mLamin-647_4_1_07	71.4922	7338.47	12364.4	18	11
112221_W1118_6hrsND_RbFOXO-488_mLamin-647_4_1_08	55.7698	6403.34	10454.1	12	17
112221_W1118_6hrsND_RbFOXO-488_mLamin-647_4_1_09	80.2459	9115.78	15805.2	18	5
112221_W1118_6hrsND_RbFOXO-488_mLamin-647_4_1_10	158.412	13163.4	22551.6	16	1
112221_W1118_6hrsND_RbFOXO-488_mLamin-647_4_1_11	18.8188	9133.16	16219.5	5	1
112221_W1118_6hrsND_RbFOXO-488_mLamin-647_4_1_12	97.1011	13683.9	23051.5	12	1
112221_W1118_6hrsND_RbFOXO-488_mLamin-647_4_1_13	27.9982	5056.92	7605	7	26
112221_W1118_6hrsND_RbFOXO-488_mLamin-647_4_1_14	65.3165	8547.38	13738.7	14	14
112221_W1118_6hrsND_RbFOXO-488_mLamin-647_4_1_15	79.2092	12066.4	20265.3	12	6
112221_W1118_6hrsND_RbFOXO-488_mLamin-647_4_1_16	86.8576	8557.08	14478.3	19	8
112221_W1118_6hrsND_RbFOXO-488_mLamin-647_4_1_17	122.978	12019.2	20880	16	5
112221_W1118_6hrsND_RbFOXO-488_mLamin-647_4_1_18	87.3622	11889.8	21053.1	15	1
112221_W1118_6hrsND_RbFOXO-488_mLamin-647_4_1_19	83.4007	9784.32	17362.3	16	10
112221_W1118_6hrsND_RbFOXO-488_mLamin-647_4_1_20	41.1803	6178.37	10027.2	11	20
112221_W1118_6hrsND_RbFOXO-488_mLamin-647_4_1_21	90.6955	12911.3	22373	16	1
112221_W1118_6hrsND_RbFOXO-488_mLamin-647_4_1_22	128.244	12360.7	21512.8	17	1
112221_W1118_6hrsND_RbFOXO-488_mLamin-647_4_1_23	74.3586	13505.1	22387.3	17	6
112221_W1118_6hrsND_RbFOXO-488_mLamin-647_4_1_24	93.0195	13435.2	21795.6	14	1
112221_W1118_6hrsND_RbFOXO-488_mLamin-647_4_1_25	44.7024	6854.42	11203.8	13	17
112221_W1118_6hrsND_RbFOXO-488_mLamin-647_4_1_26	12.3548	6998.76	10886.1	6	11
112221_W1118_6hrsND_RbFOXO-488_mLamin-647_4_1_27	83.8916	7925.18	12601.4	13	17
112221_W1118_6hrsND_RbFOXO-488_mLamin-647_4_1_28	17.4182	5607.04	8638.28	5	28
112221_W1118_6hrsND_RbFOXO-488_mLamin-647_4_1_29	119.94	13956.8	22535	18	4
112221_W1118_6hrsND_RbFOXO-488_mLamin-647_4_1_30	73.3356	10102.4	17540	13	5
112221_W1118_6hrsND_RbFOXO-488_mLamin-647_4_1_31	87.3347	12106.7	20346.4	18	3
112221_W1118_6hrsND_RbFOXO-488_mLamin-647_4_1_32	65.5568	8144.11	13383.8	15	12
112221_W1118_6hrsND_RbFOXO-488_mLamin-647_4_1_33	72.1067	17536.8	29050	9	1
112221_W1118_6hrsND_RbFOXO-488_mLamin-647_4_1_34	63.758	8571.26	13684.9	17	7
112221_W1118_6hrsND_RbFOXO-488_mLamin-647_4_1_35	41.0601	6496.83	10615	7	22
112221_W1118_6hrsND_RbFOXO-488_mLamin-647_4_1_36	54.8876	6646.79	10461.8	14	15
112221_W1118_6hrsND_RbFOXO-488_mLamin-647_4_1_37	26.9306	5381.88	8138.15	5	33
112221_W1118_6hrsND_RbFOXO-488_mLamin-647_4_1_38	33.0239	6289.49	8712.4	9	26
112221_W1118_6hrsND_RbFOXO-488_mLamin-647_4_1_39	168.562	11082.2	19731	25	1
112221_W1118_6hrsND_RbFOXO-488_mLamin-647_4_1_40	63.9606	9254.02	15821.5	18	1
112221_W1118_6hrsND_RbFOXO-488_mLamin-647_4_1_41	88.0041	15429	24687.7	15	1
112221_W1118_6hrsND_RbFOXO-488_mLamin-647_4_1_42	79.7447	15455.6	26359.4	13	1
112221_W1118_6hrsND_RbFOXO-488_mLamin-647_4_1_43	58.4989	6043.41	11168.3	16	8
112221_W1118_6hrsND_RbFOXO-488_mLamin-647_4_1_44	3.76582	6951.98	10389	2	27
112221_W1118_6hrsND_RbFOXO-488_mLamin-647_4_1_45	10.2058	4807.46	8127.48	2	28
112221_W1118_6hrsND_RbFOXO-488_mLamin-647_4_1_46	115.305	9753.12	17389.8	20	3
112221_W1118_6hrsND_RbFOXO-488_mLamin-647_4_1_47	77.0122	8595.76	13973	14	18
112221_W1118_6hrsND_RbFOXO-488_mLamin-647_4_1_48	88.0934	10902.9	18693	19	1
112221_W1118_6hrsND_RbFOXO-488_mLamin-647_4_1_49	36.594	5815.29	8376.8	9	23
112221_W1118_6hrsND_RbFOXO-488_mLamin-647_4_1_50	57.2871	8780.8	14105.9	16	9
112221_W1118_6hrsND_RbFOXO-488_mLamin-647_4_1_51	77.3658	11315.7	17869.4	18	7
112221_W1118_6hrsND_RbFOXO-488_mLamin-647_4_1_52	5.89418	5915.68	9320.69	6	28
112221_W1118_6hrsND_RbFOXO-488_mLamin-647_4_1_53	19.2616	9883.81	16738.3	5	2
112221_W1118_6hrsND_RbFOXO-488_mLamin-647_4_1_54	29.7043	9660.4	16671.9	8	2
112221_W1118_6hrsND_RbFOXO-488_mLamin-647_5_1_01	3.24403	6102.47	14928.2	2	12
112221_W1118_6hrsND_RbFOXO-488_mLamin-647_5_1_02	20.0649	6921.32	11960.4	8	14
112221_W1118_6hrsND_RbFOXO-488_mLamin-647_5_1_03	79.9301	6191.32	10617.9	18	32
112221_W1118_6hrsND_RbFOXO-488_mLamin-647_5_1_04	125.274	11390	19385	21	1
112221_W1118_6hrsND_RbFOXO-488_mLamin-647_5_1_05	93.5276	5726.98	9218.6	19	22
112221_W1118_6hrsND_RbFOXO-488_mLamin-647_5_1_06	136.702	9563.69	16733.8	22	5
112221_W1118_6hrsND_RbFOXO-488_mLamin-647_5_1_07	134.049	10030.4	18470	22	3
112221_W1118_6hrsND_RbFOXO-488_mLamin-647_5_1_08	112.597	7336.97	12466.5	21	9
112221_W1118_6hrsND_RbFOXO-488_mLamin-647_5_1_09	87.1631	5245.26	8090.54	17	23
112221_W1118_6hrsND_RbFOXO-488_mLamin-647_5_1_10	120.513	6332.88	10075.6	22	13
112221_W1118_6hrsND_RbFOXO-488_mLamin-647_5_1_11	53.3291	3856.73	5509	11	29
112221_W1118_6hrsND_RbFOXO-488_mLamin-647_5_1_12	34.7471	3647.92	5615.36	11	31
112221_W1118_6hrsND_RbFOXO-488_mLamin-647_5_1_13	85.0725	7165.25	11602	17	18
112221_W1118_6hrsND_RbFOXO-488_mLamin-647_5_1_14	35.7152	4209.62	5996.52	9	33
112221_W1118_6hrsND_RbFOXO-488_mLamin-647_5_1_15	104.863	6290.52	10643	21	16
112221_W1118_6hrsND_RbFOXO-488_mLamin-647_5_1_16	108.708	5979.56	10537	19	16
112221_W1118_6hrsND_RbFOXO-488_mLamin-647_5_1_17	106.679	13575.8	24148.4	18	1
112221_W1118_6hrsND_RbFOXO-488_mLamin-647_5_1_18	125.916	7532.83	12599	20	9
112221_W1118_6hrsND_RbFOXO-488_mLamin-647_5_1_19	187.299	7116.76	11610	23	8
112221_W1118_6hrsND_RbFOXO-488_mLamin-647_5_1_20	70.8228	3972.9	6371.57	11	34
112221_W1118_6hrsND_RbFOXO-488_mLamin-647_5_1_21	55.5089	4268.1	6681	11	25
112221_W1118_6hrsND_RbFOXO-488_mLamin-647_5_1_22	101.811	5293.31	8524	14	22
112221_W1118_6hrsND_RbFOXO-488_mLamin-647_5_1_23	1.41089	3582.93	5943.78	1	41
112221_W1118_6hrsND_RbFOXO-488_mLamin-647_5_1_24	90.6852	5409.79	8493	19	20
112221_W1118_6hrsND_RbFOXO-488_mLamin-647_5_1_25	100.246	6403.43	10330	19	16
112221_W1118_6hrsND_RbFOXO-488_mLamin-647_5_1_26	76.8406	4830.98	7659.98	18	21
112221_W1118_6hrsND_RbFOXO-488_mLamin-647_5_1_27	53.1334	4202.89	6772.48	13	28
112221_W1118_6hrsND_RbFOXO-488_mLamin-647_5_1_28	183.052	8381.28	14212.8	26	7
112221_W1118_6hrsND_RbFOXO-488_mLamin-647_5_1_29	2.09403	3216.68	4615.6	1	40
112221_W1118_6hrsND_RbFOXO-488_mLamin-647_5_1_30	170.083	6302.2	10629	23	11
112221_W1118_6hrsND_RbFOXO-488_mLamin-647_5_1_31	87.987	5414.46	9274.14	20	15
112221_W1118_6hrsND_RbFOXO-488_mLamin-647_5_1_32	111.296	5899.82	9216.74	22	11
112221_W1118_6hrsND_RbFOXO-488_mLamin-647_5_1_33	87.8085	4775.21	7528.13	18	20
112221_W1118_6hrsND_RbFOXO-488_mLamin-647_5_1_34	74.2522	5094.27	8127.6	17	22
112221_W1118_6hrsND_RbFOXO-488_mLamin-647_5_1_35	79.1337	6881.46	12379.8	17	25
112221_W1118_6hrsND_RbFOXO-488_mLamin-647_5_1_36	95.0449	4332.39	6588.89	15	23
112221_W1118_6hrsND_RbFOXO-488_mLamin-647_5_1_37	88.5156	5756.7	9430	17	17
112221_W1118_6hrsND_RbFOXO-488_mLamin-647_5_1_38	85.2235	5752.86	9419.72	17	20
112221_W1118_6hrsND_RbFOXO-488_mLamin-647_5_1_39	64.7192	5861.17	11615.1	20	7
112221_W1118_6hrsND_RbFOXO-488_mLamin-647_5_1_40	79.9095	4982.78	7698.16	18	20
112221_W1118_6hrsND_RbFOXO-488_mLamin-647_5_1_41	88.241	6397.54	11246.7	16	20
112221_W1118_6hrsND_RbFOXO-488_mLamin-647_5_1_42	107.338	8348.54	14485.8	22	12
112221_W1118_6hrsND_RbFOXO-488_mLamin-647_5_1_43	154.066	6055.84	9522.1	21	15
112221_W1118_6hrsND_RbFOXO-488_mLamin-647_5_1_44	68.1761	5444.85	8379	14	21
112221_W1118_6hrsND_RbFOXO-488_mLamin-647_6_1_01	1.61686	4127.45	6859.45	1	33
112221_W1118_6hrsND_RbFOXO-488_mLamin-647_6_1_02	137.396	7090.72	12023.6	22	8
112221_W1118_6hrsND_RbFOXO-488_mLamin-647_6_1_03	118.319	6517.22	11463.5	22	15
112221_W1118_6hrsND_RbFOXO-488_mLamin-647_6_1_04	130.427	6283.84	11391	23	9
112221_W1118_6hrsND_RbFOXO-488_mLamin-647_6_1_05	1.46239	3785.23	5953.72	1	32
112221_W1118_6hrsND_RbFOXO-488_mLamin-647_6_1_06	78.1347	4623.21	7173	14	21
112221_W1118_6hrsND_RbFOXO-488_mLamin-647_6_1_07	98.8519	7200.27	12741.1	20	11
112221_W1118_6hrsND_RbFOXO-488_mLamin-647_6_1_08	123.798	9574.3	16394.4	21	1
112221_W1118_6hrsND_RbFOXO-488_mLamin-647_6_1_09	113.764	7633.52	14221	19	7
112221_W1118_6hrsND_RbFOXO-488_mLamin-647_6_1_10	79.0685	5434.39	9849	16	24
112221_W1118_6hrsND_RbFOXO-488_mLamin-647_6_1_11	9.4094	3267.94	4744.43	3	44
112221_W1118_6hrsND_RbFOXO-488_mLamin-647_6_1_12	34.7849	3304.44	5181.02	7	37
112221_W1118_6hrsND_RbFOXO-488_mLamin-647_6_1_13	82.3606	9045.71	15476.7	16	11
112221_W1118_6hrsND_RbFOXO-488_mLamin-647_6_1_14	93.9979	8293.17	16445.1	21	8
112221_W1118_6hrsND_RbFOXO-488_mLamin-647_6_1_15	90.8877	8196.9	16433.7	20	12
112221_W1118_6hrsND_RbFOXO-488_mLamin-647_6_1_16	173.475	9408.47	17256	22	5
112221_W1118_6hrsND_RbFOXO-488_mLamin-647_6_1_17	106.068	6635.94	11844	21	8
112221_W1118_6hrsND_RbFOXO-488_mLamin-647_6_1_18	63.5555	4770.44	7589.56	14	29
112221_W1118_6hrsND_RbFOXO-488_mLamin-647_6_1_19	62.6938	5700.64	9628.61	13	22
112221_W1118_6hrsND_RbFOXO-488_mLamin-647_6_1_20	24.6272	2892.46	4259.84	5	44
112221_W1118_6hrsND_RbFOXO-488_mLamin-647_6_1_21	104.763	6511.64	11689.8	17	12
112221_W1118_6hrsND_RbFOXO-488_mLamin-647_6_1_22	38.5542	7584.76	15405.7	6	22
112221_W1118_6hrsND_RbFOXO-488_mLamin-647_6_1_23	131.556	5805.69	9554.81	19	19
112221_W1118_6hrsND_RbFOXO-488_mLamin-647_6_1_24	65.2204	9398.04	17162.2	12	1
112221_W1118_6hrsND_RbFOXO-488_mLamin-647_6_1_25	176.602	11262.7	21601.2	23	1
112221_W1118_6hrsND_RbFOXO-488_mLamin-647_6_1_26	118.639	10789.7	19034	17	13
112221_W1118_6hrsND_RbFOXO-488_mLamin-647_6_1_27	3.75552	3883.16	6251.84	2	24
112221_W1118_6hrsND_RbFOXO-488_mLamin-647_6_1_28	37.847	4040.78	6126.25	9	27
112221_W1118_6hrsND_RbFOXO-488_mLamin-647_6_1_29	113.239	8093.73	16489.8	21	4
112221_W1118_6hrsND_RbFOXO-488_mLamin-647_6_1_30	151.409	7517.54	13119.3	22	8
112221_W1118_6hrsND_RbFOXO-488_mLamin-647_6_1_31	101.691	7023.66	11941.6	14	15
112221_W1118_6hrsND_RbFOXO-488_mLamin-647_6_1_32	30.2433	3913.34	5919.8	7	29
112221_W1118_6hrsND_RbFOXO-488_mLamin-647_6_1_33	15.1628	5932.04	10238.7	5	16

## Sheet: HSD
ID	NucVol	NucMI	q97	NbSlices	FirstSlice
112221_W1118_6hrsHSD_RbFOXO-488_mLamin-647_1_1_01	90.0364	11701.8	22327.3	17	4
112221_W1118_6hrsHSD_RbFOXO-488_mLamin-647_1_1_02	61.3962	7006.19	11927	17	7
112221_W1118_6hrsHSD_RbFOXO-488_mLamin-647_1_1_03	112.14	9941.8	16813.5	16	5
112221_W1118_6hrsHSD_RbFOXO-488_mLamin-647_1_1_04	48.5677	6080.75	10380.1	10	27
112221_W1118_6hrsHSD_RbFOXO-488_mLamin-647_1_1_05	9.59134	3334.59	5392.68	6	35
112221_W1118_6hrsHSD_RbFOXO-488_mLamin-647_1_1_06	65.1243	5180.69	9708.74	17	7
112221_W1118_6hrsHSD_RbFOXO-488_mLamin-647_1_1_07	231.768	10100.8	21409.1	19	1
112221_W1118_6hrsHSD_RbFOXO-488_mLamin-647_1_1_08	65.8486	8395.98	15862.2	12	7
112221_W1118_6hrsHSD_RbFOXO-488_mLamin-647_1_1_09	2.61239	5757.38	8383.41	2	24
112221_W1118_6hrsHSD_RbFOXO-488_mLamin-647_1_1_10	49.9203	8303	13338.7	15	22
112221_W1118_6hrsHSD_RbFOXO-488_mLamin-647_1_1_11	36.9922	5901.68	9679.22	11	12
112221_W1118_6hrsHSD_RbFOXO-488_mLamin-647_1_1_12	80.5412	11506.9	21307.6	14	3
112221_W1118_6hrsHSD_RbFOXO-488_mLamin-647_1_1_13	51.4788	8673.77	14594	11	19
112221_W1118_6hrsHSD_RbFOXO-488_mLamin-647_1_1_14	11.1704	6686.64	9828.32	3	26
112221_W1118_6hrsHSD_RbFOXO-488_mLamin-647_1_1_15	75.5223	15032.7	27163.5	13	1
112221_W1118_6hrsHSD_RbFOXO-488_mLamin-647_1_1_16	18.1219	8633.45	15593.5	6	10
112221_W1118_6hrsHSD_RbFOXO-488_mLamin-647_1_1_17	30.4664	7218.99	11573.2	7	26
112221_W1118_6hrsHSD_RbFOXO-488_mLamin-647_1_1_18	9.74238	3856.98	5864.88	6	30
112221_W1118_6hrsHSD_RbFOXO-488_mLamin-647_1_1_19	96.6411	11806.4	21903.6	19	1
112221_W1118_6hrsHSD_RbFOXO-488_mLamin-647_1_1_20	80.2562	15683.8	27928.4	13	1
112221_W1118_6hrsHSD_RbFOXO-488_mLamin-647_1_1_21	37.8745	6802.96	11864.5	12	16
112221_W1118_6hrsHSD_RbFOXO-488_mLamin-647_1_1_22	82.9922	13731.8	24678.7	12	1
112221_W1118_6hrsHSD_RbFOXO-488_mLamin-647_1_1_23	61.077	12314.4	22714.8	16	2
112221_W1118_6hrsHSD_RbFOXO-488_mLamin-647_1_1_24	99.1917	11237.1	22591.3	19	1
112221_W1118_6hrsHSD_RbFOXO-488_mLamin-647_1_1_25	37.4351	6829.85	10889.1	11	13
112221_W1118_6hrsHSD_RbFOXO-488_mLamin-647_1_1_26	80.96	11792	24610.9	16	1
112221_W1118_6hrsHSD_RbFOXO-488_mLamin-647_1_1_27	21.9564	6400.41	10352	8	19
112221_W1118_6hrsHSD_RbFOXO-488_mLamin-647_1_1_28	121.866	10518.5	21160	19	1
112221_W1118_6hrsHSD_RbFOXO-488_mLamin-647_1_1_29	21.4449	5893	9778.27	6	36
112221_W1118_6hrsHSD_RbFOXO-488_mLamin-647_1_1_30	72.934	10203.7	17897	17	2
112221_W1118_6hrsHSD_RbFOXO-488_mLamin-647_2_1_01	30.4355	3485.15	5393.52	8	27
112221_W1118_6hrsHSD_RbFOXO-488_mLamin-647_2_1_02	110.822	6458.69	11058	18	12
112221_W1118_6hrsHSD_RbFOXO-488_mLamin-647_2_1_03	35.88	4960.05	7401.94	12	20
112221_W1118_6hrsHSD_RbFOXO-488_mLamin-647_2_1_04	102.487	10380.1	19696.8	15	1
112221_W1118_6hrsHSD_RbFOXO-488_mLamin-647_2_1_05	11.3284	4030.09	6097	3	34
112221_W1118_6hrsHSD_RbFOXO-488_mLamin-647_2_1_06	88.6083	8677.49	16589	19	4
112221_W1118_6hrsHSD_RbFOXO-488_mLamin-647_2_1_07	98.9549	9540.93	17555.7	17	2
112221_W1118_6hrsHSD_RbFOXO-488_mLamin-647_2_1_08	63.5692	6271.9	10820	16	8
112221_W1118_6hrsHSD_RbFOXO-488_mLamin-647_2_1_09	92.0892	9795.84	18093.2	19	2
112221_W1118_6hrsHSD_RbFOXO-488_mLamin-647_2_1_10	7.30164	7287.4	18279.5	1	11
112221_W1118_6hrsHSD_RbFOXO-488_mLamin-647_2_1_11	100.194	9451	17244.4	15	7
112221_W1118_6hrsHSD_RbFOXO-488_mLamin-647_2_1_12	115.021	7488.98	13076.6	19	5
112221_W1118_6hrsHSD_RbFOXO-488_mLamin-647_2_1_13	90.1908	7809.47	13939.2	20	2
112221_W1118_6hrsHSD_RbFOXO-488_mLamin-647_2_1_14	97.2041	7139.79	12466	13	9
112221_W1118_6hrsHSD_RbFOXO-488_mLamin-647_2_1_15	92.7414	8252.39	15325	20	2
112221_W1118_6hrsHSD_RbFOXO-488_mLamin-647_2_1_16	125.477	7479.28	13886	21	11
112221_W1118_6hrsHSD_RbFOXO-488_mLamin-647_2_1_17	4.15716	3961.29	6888.34	3	27
112221_W1118_6hrsHSD_RbFOXO-488_mLamin-647_2_1_18	95.807	6081.85	10119.2	20	12
112221_W1118_6hrsHSD_RbFOXO-488_mLamin-647_2_1_19	89.8235	8790.01	16944.6	20	1
112221_W1118_6hrsHSD_RbFOXO-488_mLamin-647_2_1_20	137.567	9642.4	17414.3	18	5
112221_W1118_6hrsHSD_RbFOXO-488_mLamin-647_2_1_21	101.677	14660.3	25968.7	15	1
112221_W1118_6hrsHSD_RbFOXO-488_mLamin-647_2_1_22	66.8785	6705.52	11895	15	14
112221_W1118_6hrsHSD_RbFOXO-488_mLamin-647_2_1_23	71.9041	7609.77	14190.4	15	11
112221_W1118_6hrsHSD_RbFOXO-488_mLamin-647_2_1_24	69.7037	8338.42	15192	19	8
112221_W1118_6hrsHSD_RbFOXO-488_mLamin-647_2_1_25	87.6849	5386.93	9310.84	15	19
112221_W1118_6hrsHSD_RbFOXO-488_mLamin-647_2_1_26	144.601	10107.4	18422.2	16	3
112221_W1118_6hrsHSD_RbFOXO-488_mLamin-647_2_1_27	83.3286	11996	20699.7	15	1
112221_W1118_6hrsHSD_RbFOXO-488_mLamin-647_2_1_28	4.54851	4043.38	6310.75	1	29
112221_W1118_6hrsHSD_RbFOXO-488_mLamin-647_2_1_29	6.56015	6075.88	11518.3	3	8
112221_W1118_6hrsHSD_RbFOXO-488_mLamin-647_3_1_01	4.65836	2914.79	4204.95	1	23
112221_W1118_6hrsHSD_RbFOXO-488_mLamin-647_3_1_02	4.17433	7101.82	13483.4	3	1
112221_W1118_6hrsHSD_RbFOXO-488_mLamin-647_3_1_03	81.6259	6420.01	12741.3	17	9
112221_W1118_6hrsHSD_RbFOXO-488_mLamin-647_3_1_04	19.2582	7285.57	14050.2	3	1
112221_W1118_6hrsHSD_RbFOXO-488_mLamin-647_3_1_05	32.6531	5301.06	10468.4	14	1
112221_W1118_6hrsHSD_RbFOXO-488_mLamin-647_3_1_06	44.1806	3056.12	6049	13	18
112221_W1118_6hrsHSD_RbFOXO-488_mLamin-647_3_1_07	33.247	4592.95	7071.7	9	24
112221_W1118_6hrsHSD_RbFOXO-488_mLamin-647_3_1_08	97.0119	8668.64	15632.8	19	2
112221_W1118_6hrsHSD_RbFOXO-488_mLamin-647_3_1_09	81.5847	4071.66	6462.04	12	16
112221_W1118_6hrsHSD_RbFOXO-488_mLamin-647_3_1_10	61.2315	5310.64	9104.56	13	12
112221_W1118_6hrsHSD_RbFOXO-488_mLamin-647_3_1_11	86.298	5074.44	9378.65	18	8
112221_W1118_6hrsHSD_RbFOXO-488_mLamin-647_3_1_12	3.45	2394.21	4386.7	3	23
112221_W1118_6hrsHSD_RbFOXO-488_mLamin-647_3_1_13	3.45	2394.21	4386.7	3	23
112221_W1118_6hrsHSD_RbFOXO-488_mLamin-647_3_1_14	88.3406	7447.35	13206.9	19	3
112221_W1118_6hrsHSD_RbFOXO-488_mLamin-647_3_1_15	86.8885	7871.8	14963	10	1
112221_W1118_6hrsHSD_RbFOXO-488_mLamin-647_3_1_16	35.1557	3670.68	6530	9	16
112221_W1118_6hrsHSD_RbFOXO-488_mLamin-647_3_1_17	81.7358	5196.39	9038.2	12	9
112221_W1118_6hrsHSD_RbFOXO-488_mLamin-647_4_1_01	3.33671	2719.26	4484.84	1	29
112221_W1118_6hrsHSD_RbFOXO-488_mLamin-647_4_1_02	40.4388	4906.36	7650.2	8	18
112221_W1118_6hrsHSD_RbFOXO-488_mLamin-647_4_1_03	134.608	12968.5	24761.4	9	1
112221_W1118_6hrsHSD_RbFOXO-488_mLamin-647_4_1_04	94.8698	10906.6	20396.4	14	1
112221_W1118_6hrsHSD_RbFOXO-488_mLamin-647_4_1_05	90.9564	8823.71	15563.6	16	2
112221_W1118_6hrsHSD_RbFOXO-488_mLamin-647_4_1_06	126.229	6584.53	11283.4	13	13
112221_W1118_6hrsHSD_RbFOXO-488_mLamin-647_4_1_07	56.1406	4980.9	7770.64	11	15
112221_W1118_6hrsHSD_RbFOXO-488_mLamin-647_4_1_08	14.5484	3755.69	5322.72	3	23
112221_W1118_6hrsHSD_RbFOXO-488_mLamin-647_4_1_09	87.4137	5161.64	8436.58	12	16
112221_W1118_6hrsHSD_RbFOXO-488_mLamin-647_4_1_10	72.8104	7352.76	12412	13	17
112221_W1118_6hrsHSD_RbFOXO-488_mLamin-647_4_1_11	104.331	7639.4	13387.7	16	5
112221_W1118_6hrsHSD_RbFOXO-488_mLamin-647_4_1_12	61.9077	6189.26	10653.8	9	15
112221_W1118_6hrsHSD_RbFOXO-488_mLamin-647_4_1_13	69.7243	5768.36	9614	16	11
112221_W1118_6hrsHSD_RbFOXO-488_mLamin-647_4_1_14	61.7121	6098.6	10815.2	9	23
112221_W1118_6hrsHSD_RbFOXO-488_mLamin-647_4_1_15	69.9131	6337.04	11197.5	15	15
112221_W1118_6hrsHSD_RbFOXO-488_mLamin-647_4_1_16	101.118	7513.44	13001.8	15	8
112221_W1118_6hrsHSD_RbFOXO-488_mLamin-647_4_1_17	165.449	7650.38	13994.7	16	3
112221_W1118_6hrsHSD_RbFOXO-488_mLamin-647_4_1_18	75.6803	6235.62	10605	16	9
112221_W1118_6hrsHSD_RbFOXO-488_mLamin-647_4_1_19	1.03328	5221.56	7982.32	1	36
112221_W1118_6hrsHSD_RbFOXO-488_mLamin-647_4_1_20	20.4151	3406.76	5311.18	4	27
112221_W1118_6hrsHSD_RbFOXO-488_mLamin-647_4_1_21	87.8222	5899.76	10086	12	16
112221_W1118_6hrsHSD_RbFOXO-488_mLamin-647_4_1_22	19.7045	3935.63	7054.8	12	16
112221_W1118_6hrsHSD_RbFOXO-488_mLamin-647_4_1_23	36.8309	8658.51	18611.3	9	1
112221_W1118_6hrsHSD_RbFOXO-488_mLamin-647_4_1_24	59.9888	6409.53	10183	12	14
112221_W1118_6hrsHSD_RbFOXO-488_mLamin-647_4_1_25	143.554	8167.05	13550	18	7
112221_W1118_6hrsHSD_RbFOXO-488_mLamin-647_4_1_26	60.8916	10873.4	20280.2	12	1
112221_W1118_6hrsHSD_RbFOXO-488_mLamin-647_4_1_27	15.8597	5537.21	8363.9	5	21
112221_W1118_6hrsHSD_RbFOXO-488_mLamin-647_4_1_28	79.0204	7218.33	12659.9	15	8
112221_W1118_6hrsHSD_RbFOXO-488_mLamin-647_4_1_29	82.8995	10543.6	18638.2	17	7
112221_W1118_6hrsHSD_RbFOXO-488_mLamin-647_4_1_30	35.9727	5492.41	9355.26	10	21
112221_W1118_6hrsHSD_RbFOXO-488_mLamin-647_4_1_31	87.4309	9795.2	17070.4	16	1
112221_W1118_6hrsHSD_RbFOXO-488_mLamin-647_4_1_32	72.5529	8735.5	16223.9	16	10
112221_W1118_6hrsHSD_RbFOXO-488_mLamin-647_4_1_33	95.4259	12033.6	20649.8	14	1
112221_W1118_6hrsHSD_RbFOXO-488_mLamin-647_4_1_34	85.4467	9592.54	16737.5	21	2
112221_W1118_6hrsHSD_RbFOXO-488_mLamin-647_4_1_35	32.0043	6431.54	13507.8	8	1
112221_W1118_6hrsHSD_RbFOXO-488_mLamin-647_4_1_36	73.2979	4254.16	6931	14	24
112221_W1118_6hrsHSD_RbFOXO-488_mLamin-647_4_1_37	64.2146	5150.2	8779.96	11	19
112221_W1118_6hrsHSD_RbFOXO-488_mLamin-647_5_1_01	0.748358	5295.28	8959.32	1	20
112221_W1118_6hrsHSD_RbFOXO-488_mLamin-647_5_1_02	6.97552	3750.82	6436.68	2	20
112221_W1118_6hrsHSD_RbFOXO-488_mLamin-647_5_1_03	5.84955	4612.34	7178.84	2	20
112221_W1118_6hrsHSD_RbFOXO-488_mLamin-647_5_1_04	54.2388	3675.45	9131.5	15	3
112221_W1118_6hrsHSD_RbFOXO-488_mLamin-647_5_1_05	104.671	3897.06	6169	16	15
112221_W1118_6hrsHSD_RbFOXO-488_mLamin-647_5_1_06	20.3979	1382.95	2620.44	6	44
112221_W1118_6hrsHSD_RbFOXO-488_mLamin-647_5_1_07	167.68	5947.56	9707.24	21	4
112221_W1118_6hrsHSD_RbFOXO-488_mLamin-647_5_1_08	101.341	4143.33	6892.74	17	13
112221_W1118_6hrsHSD_RbFOXO-488_mLamin-647_5_1_09	151.374	8226.43	13505	20	3
112221_W1118_6hrsHSD_RbFOXO-488_mLamin-647_5_1_10	6.26149	6343.41	12066.8	3	2
112221_W1118_6hrsHSD_RbFOXO-488_mLamin-647_5_1_11	78.502	3350.51	5305	10	21
112221_W1118_6hrsHSD_RbFOXO-488_mLamin-647_5_1_12	182.936	8507.61	15102	18	1
112221_W1118_6hrsHSD_RbFOXO-488_mLamin-647_5_1_13	2.82866	5162.05	10029.5	1	10
112221_W1118_6hrsHSD_RbFOXO-488_mLamin-647_5_1_14	106.521	5035.42	8259.6	12	14
112221_W1118_6hrsHSD_RbFOXO-488_mLamin-647_5_1_15	83.4797	3636.37	6049	17	16
112221_W1118_6hrsHSD_RbFOXO-488_mLamin-647_5_1_16	46.9028	4050.22	6403	8	16
112221_W1118_6hrsHSD_RbFOXO-488_mLamin-647_5_1_17	112.923	7119.15	12340.6	16	11
112221_W1118_6hrsHSD_RbFOXO-488_mLamin-647_5_1_18	95.6731	6550.63	10909	14	10
112221_W1118_6hrsHSD_RbFOXO-488_mLamin-647_5_1_19	99.1711	4658.49	8136.66	12	10
112221_W1118_6hrsHSD_RbFOXO-488_mLamin-647_5_1_20	122.006	6766.8	11439	16	8
112221_W1118_6hrsHSD_RbFOXO-488_mLamin-647_5_1_21	120.135	6709.71	11797.2	15	6
112221_W1118_6hrsHSD_RbFOXO-488_mLamin-647_5_1_22	62.8483	5068.56	10747.3	14	1
112221_W1118_6hrsHSD_RbFOXO-488_mLamin-647_5_1_23	158.909	8540.26	14689.5	18	1
112221_W1118_6hrsHSD_RbFOXO-488_mLamin-647_5_1_24	32.533	3195.35	4975.14	3	26
112221_W1118_6hrsHSD_RbFOXO-488_mLamin-647_5_1_25	18.3622	2875.76	5183	10	39
112221_W1118_6hrsHSD_RbFOXO-488_mLamin-647_6_1_01	2.40985	2774.12	4635	1	1
112221_W1118_6hrsHSD_RbFOXO-488_mLamin-647_6_1_02	82.4395	9757.44	18399.2	10	15
112221_W1118_6hrsHSD_RbFOXO-488_mLamin-647_6_1_03	99.614	8548.17	18397.9	12	2
112221_W1118_6hrsHSD_RbFOXO-488_mLamin-647_6_1_04	57.2185	10598.2	20910.8	16	2
112221_W1118_6hrsHSD_RbFOXO-488_mLamin-647_6_1_05	34.6064	9630.29	21241	10	1
112221_W1118_6hrsHSD_RbFOXO-488_mLamin-647_6_1_06	95.7177	8732.67	16770	16	11
112221_W1118_6hrsHSD_RbFOXO-488_mLamin-647_6_1_07	162.558	10606.7	21328.9	24	1
112221_W1118_6hrsHSD_RbFOXO-488_mLamin-647_6_1_08	76.5213	10346.4	21558.1	16	11
112221_W1118_6hrsHSD_RbFOXO-488_mLamin-647_6_1_09	4.15716	5106.48	7323.23	4	39
112221_W1118_6hrsHSD_RbFOXO-488_mLamin-647_6_1_10	69.4909	9375.56	16989.9	15	15
112221_W1118_6hrsHSD_RbFOXO-488_mLamin-647_6_1_11	24.2186	7617.22	12217.6	7	23
112221_W1118_6hrsHSD_RbFOXO-488_mLamin-647_6_1_12	38.1216	7162.27	11378.9	14	13
112221_W1118_6hrsHSD_RbFOXO-488_mLamin-647_6_1_13	17.0612	4656.45	6974.4	5	31
112221_W1118_6hrsHSD_RbFOXO-488_mLamin-647_6_1_14	72.6044	7916.13	14123	18	2
112221_W1118_6hrsHSD_RbFOXO-488_mLamin-647_6_1_15	161.632	8911.89	18998	26	1
112221_W1118_6hrsHSD_RbFOXO-488_mLamin-647_6_1_16	50.7167	10101.4	21920.6	17	7
112221_W1118_6hrsHSD_RbFOXO-488_mLamin-647_6_1_17	143.829	10979.1	21406.4	22	5
112221_W1118_6hrsHSD_RbFOXO-488_mLamin-647_6_1_18	113.455	11545.5	25009	14	3
112221_W1118_6hrsHSD_RbFOXO-488_mLamin-647_6_1_19	104.89	10762.4	21514.2	19	2
112221_W1118_6hrsHSD_RbFOXO-488_mLamin-647_6_1_20	66.2159	9826.36	19247.7	14	11
112221_W1118_6hrsHSD_RbFOXO-488_mLamin-647_6_1_21	42.7422	7306.73	13949.8	12	14
112221_W1118_6hrsHSD_RbFOXO-488_mLamin-647_6_1_22	89.185	9712.58	19467.4	16	1
112221_W1118_6hrsHSD_RbFOXO-488_mLamin-647_6_1_23	5.2488	5136.16	7784.19	1	35
112221_W1118_6hrsHSD_RbFOXO-488_mLamin-647_6_1_24	111.014	11598.6	22419.6	14	7
112221_W1118_6hrsHSD_RbFOXO-488_mLamin-647_6_1_25	6.39537	5960.48	9104.25	3	32
112221_W1118_6hrsHSD_RbFOXO-488_mLamin-647_6_1_26	120.585	8163.81	18585.4	12	1
112221_W1118_6hrsHSD_RbFOXO-488_mLamin-647_6_1_27	42.9379	5524.17	9376.26	10	26
112221_W1118_6hrsHSD_RbFOXO-488_mLamin-647_6_1_28	53.9058	8035.07	14409	9	20
112221_W1118_6hrsHSD_RbFOXO-488_mLamin-647_6_1_29	114.952	13509.3	26744	16	4
112221_W1118_6hrsHSD_RbFOXO-488_mLamin-647_6_1_30	36.7451	7310.32	13460.4	11	21
112221_W1118_6hrsHSD_RbFOXO-488_mLamin-647_6_1_31	59.8	6751.49	11956.9	14	18
112221_W1118_6hrsHSD_RbFOXO-488_mLamin-647_6_1_32	61.2521	9945.77	18111.6	15	3
112221_W1118_6hrsHSD_RbFOXO-488_mLamin-647_6_1_33	16.5222	4594.54	8228.88	10	25
112221_W1118_6hrsHSD_RbFOXO-488_mLamin-647_6_1_34	82.3743	9544.76	17894.6	17	12
112221_W1118_6hrsHSD_RbFOXO-488_mLamin-647_6_1_35	63.0783	8628.49	15853.2	9	16
112221_W1118_6hrsHSD_RbFOXO-488_mLamin-647_6_1_36	64.3691	7941.79	13907	13	18
112221_W1118_6hrsHSD_RbFOXO-488_mLamin-647_6_1_37	119.703	12020.1	25622.6	16	3
112221_W1118_6hrsHSD_RbFOXO-488_mLamin-647_6_1_38	29.8931	9436.88	20573.4	13	1
112221_W1118_6hrsHSD_RbFOXO-488_mLamin-647_6_1_39	38.5061	6095.71	9599.94	11	24
112221_W1118_6hrsHSD_RbFOXO-488_mLamin-647_6_1_40	65.265	8031.4	13573.4	10	28
112221_W1118_6hrsHSD_RbFOXO-488_mLamin-647_6_1_41	50.3871	7086.42	12666.6	8	27
