# Supplementary material for: Fat body phospholipid state dictates hunger-driven feeding behavior
Source: eLife journal article supplement (doi:10.7554/elife.80282), 2022-10-06
Supplement: supp [file elife-80282-supp-v1.zip › elife_poa_e80282_Figure_2_source_data_1.xlsx]

## Sheet: Sheet1
Dilp5 accumulation in IPC after 14 days on NF/HSD Diet
	NF	HSD
	1.73292e+08	7.78465e+07
	2.78761e+08	1.42839e+08
	2.40602e+08	6.39992e+07
	2.11037e+08	8.26526e+07
	2.82766e+08	7.71357e+07
		1.12154e+08
		1.34563e+08
