# Supplementary material for: Fat body phospholipid state dictates hunger-driven feeding behavior
Source: eLife journal article supplement (doi:10.7554/elife.80282), 2022-10-06
Supplement: supp [file elife-80282-supp-v1.zip › elife_poa_e80282_Figure_2_source_data_2.xlsx]

## Sheet: 14Days
ID	NucVol	NucMI	q97	NbSlices	FirstSlice
092421_W1118_2weeksHSD_RbFOXO-488_mLamin-647_1_1_04	60.7514	24028.4	36736.9	10	1
092421_W1118_2weeksHSD_RbFOXO-488_mLamin-647_1_1_05	63.3946	16667.6	28996	7	1
092421_W1118_2weeksHSD_RbFOXO-488_mLamin-647_1_1_07	65.2435	16595.2	26611.4	9	1
092421_W1118_2weeksHSD_RbFOXO-488_mLamin-647_1_1_08	71.1283	20466.4	32195.9	9	1
092421_W1118_2weeksHSD_RbFOXO-488_mLamin-647_1_1_09	93.8046	13672.4	23845.6	16	2
092421_W1118_2weeksHSD_RbFOXO-488_mLamin-647_1_1_10	64.704	16041.7	24749.7	11	5
092421_W1118_2weeksHSD_RbFOXO-488_mLamin-647_1_1_11	65.6799	18268.3	30875.4	7	1
092421_W1118_2weeksHSD_RbFOXO-488_mLamin-647_1_1_16	39.1637	13554.1	27753.4	6	1
092421_W1118_2weeksHSD_RbFOXO-488_mLamin-647_1_1_17	71.4471	20815.5	34456.4	9	1
092421_W1118_2weeksHSD_RbFOXO-488_mLamin-647_1_1_18	53.9789	18507.1	31045.9	5	1
092421_W1118_2weeksHSD_RbFOXO-488_mLamin-647_1_1_19	37.8053	20173.2	30594.9	6	2
092421_W1118_2weeksHSD_RbFOXO-488_mLamin-647_1_1_24	123.508	24615.8	40377.9	8	1
092421_W1118_2weeksHSD_RbFOXO-488_mLamin-647_1_1_25	40.2328	19147.6	34932.5	5	1
092421_W1118_2weeksHSD_RbFOXO-488_mLamin-647_1_1_27	118.801	16946.1	27885.2	12	1
092421_W1118_2weeksHSD_RbFOXO-488_mLamin-647_1_1_28	68.3036	21492.9	35439.7	7	1
092421_W1118_2weeksHSD_RbFOXO-488_mLamin-647_1_1_29	69.9317	20749.1	33600.2	9	1
092421_W1118_2weeksHSD_RbFOXO-488_mLamin-647_1_1_33	92.1618	14724.7	26620.1	13	1
092421_W1118_2weeksHSD_RbFOXO-488_mLamin-647_1_1_37	68.8234	21039.4	33551.9	11	2
092421_W1118_2weeksHSD_RbFOXO-488_mLamin-647_1_1_38	47.7458	25893.1	39037.3	7	1
092421_W1118_2weeksHSD_RbFOXO-488_mLamin-647_1_1_39	38.6635	18674.1	31423.9	5	1
092421_W1118_2weeksHSD_RbFOXO-488_mLamin-647_1_1_40	71.4324	19225.4	29390.6	13	4
092421_W1118_2weeksHSD_RbFOXO-488_mLamin-647_1_1_43	69.5394	24558.4	40495.7	7	6
092421_W1118_2weeksHSD_RbFOXO-488_mLamin-647_2_1_02	69.7454	18131	30776.5	8	1
092421_W1118_2weeksHSD_RbFOXO-488_mLamin-647_2_1_03	58.5985	14289.9	22423.1	9	5
092421_W1118_2weeksHSD_RbFOXO-488_mLamin-647_2_1_06	65.062	16538.3	29120	9	1
092421_W1118_2weeksHSD_RbFOXO-488_mLamin-647_2_1_07	68.3036	12506.1	20881	11	6
092421_W1118_2weeksHSD_RbFOXO-488_mLamin-647_2_1_08	66.9305	15493.7	25224.1	12	1
092421_W1118_2weeksHSD_RbFOXO-488_mLamin-647_2_1_09	67.8181	11777.9	18850.6	12	4
092421_W1118_2weeksHSD_RbFOXO-488_mLamin-647_2_1_11	86.2622	15797.7	26120.4	12	1
092421_W1118_2weeksHSD_RbFOXO-488_mLamin-647_2_1_13	72.5554	15089.3	26449.9	10	5
092421_W1118_2weeksHSD_RbFOXO-488_mLamin-647_2_1_14	82.5891	15428.3	26077.5	7	1
092421_W1118_2weeksHSD_RbFOXO-488_mLamin-647_2_1_16	91.6321	11652.1	18752.7	11	6
092421_W1118_2weeksHSD_RbFOXO-488_mLamin-647_2_1_17	38.7616	22473.8	37819.8	4	1
092421_W1118_2weeksHSD_RbFOXO-488_mLamin-647_2_1_19	55.1853	14949.3	25402.6	7	1
092421_W1118_2weeksHSD_RbFOXO-488_mLamin-647_2_1_22	72.7467	15091.2	25769.4	14	1
092421_W1118_2weeksHSD_RbFOXO-488_mLamin-647_2_1_31	68.3772	8343.84	19937.3	10	6
092421_W1118_2weeksHSD_RbFOXO-488_mLamin-647_2_1_32	48.8737	16823.3	29273.8	9	2
092421_W1118_2weeksHSD_RbFOXO-488_mLamin-647_3_1_04	58.0836	13432.1	23556	8	1
092421_W1118_2weeksHSD_RbFOXO-488_mLamin-647_3_1_06	51.7426	14954.5	29185.9	6	1
092421_W1118_2weeksHSD_RbFOXO-488_mLamin-647_3_1_10	84.0603	10828.8	19780.4	14	2
092421_W1118_2weeksHSD_RbFOXO-488_mLamin-647_3_1_11	66.8716	15612.4	31183.4	7	1
092421_W1118_2weeksHSD_RbFOXO-488_mLamin-647_3_1_12	33.2151	15732.5	26541.6	4	1
092421_W1118_2weeksHSD_RbFOXO-488_mLamin-647_3_1_17	67.6317	16017.9	29678.8	8	1
092421_W1118_2weeksHSD_RbFOXO-488_mLamin-647_3_1_20	68.2251	12033.8	22167.7	9	5
092421_W1118_2weeksHSD_RbFOXO-488_mLamin-647_3_1_23	42.2484	13510.5	25979	5	1
092421_W1118_2weeksHSD_RbFOXO-488_mLamin-647_3_1_25	60.055	17730.1	31164	8	1
092421_W1118_2weeksHSD_RbFOXO-488_mLamin-647_3_1_27	55.813	15213.8	28460.3	5	1
092421_W1118_2weeksHSD_RbFOXO-488_mLamin-647_3_1_31	62.7914	15047.7	26567.5	9	1
092421_W1118_2weeksHSD_RbFOXO-488_mLamin-647_3_1_33	58.3435	15371.8	26960	8	1
092421_W1118_2weeksHSD_RbFOXO-488_mLamin-647_4_1_04	95.9575	13660	25415	12	5
092421_W1118_2weeksHSD_RbFOXO-488_mLamin-647_4_1_05	63.0514	16776.7	26234.4	10	3
092421_W1118_2weeksHSD_RbFOXO-488_mLamin-647_4_1_08	91.5635	19504.6	36226.4	13	2
092421_W1118_2weeksHSD_RbFOXO-488_mLamin-647_4_1_10	98.694	12437.6	23724	14	2
092421_W1118_2weeksHSD_RbFOXO-488_mLamin-647_4_1_17	107.516	22828.6	36821.8	11	1
092421_W1118_2weeksHSD_RbFOXO-488_mLamin-647_4_1_18	99.101	25182.4	39851.8	9	2
092421_W1118_2weeksHSD_RbFOXO-488_mLamin-647_4_1_19	102.622	16042.2	31713.3	16	1
092421_W1118_2weeksHSD_RbFOXO-488_mLamin-647_4_1_26	63.787	32130.5	48768.2	11	1
092421_W1118_2weeksHSD_RbFOXO-488_mLamin-647_4_1_27	74.2179	18634.8	32212.5	11	1
092421_W1118_2weeksHSD_RbFOXO-488_mLamin-647_4_1_29	68.6027	20981.1	34093	11	1
092421_W1118_2weeksHSD_RbFOXO-488_mLamin-647_4_1_35	99.1452	29119.6	44240.9	11	1
092421_W1118_2weeksHSD_RbFOXO-488_mLamin-647_4_1_37	117.03	18423.4	30223.6	14	1
092421_W1118_2weeksHSD_RbFOXO-488_mLamin-647_4_1_39	73.1537	21110.9	34749	9	1
092421_W1118_2weeksHSD_RbFOXO-488_mLamin-647_4_1_40	90.7739	18487.7	31778.2	11	2
092421_W1118_2weeksHSD_RbFOXO-488_mLamin-647_4_1_42	85.0019	17432.3	27680.6	12	5
092421_W1118_2weeksHSD_RbFOXO-488_mLamin-647_4_1_43	83.1481	24820.4	40955.7	11	1
092421_W1118_2weeksHSD_RbFOXO-488_mLamin-647_4_1_44	66.9795	30959.5	52717.1	8	1
092421_W1118_2weeksHSD_RbFOXO-488_mLamin-647_4_1_45	84.2025	13053.2	22173.4	12	3
092421_W1118_2weeksHSD_RbFOXO-488_mLamin-647_4_1_46	49.0503	13829.5	24144.1	10	4
092421_W1118_2weeksHSD_RbFOXO-488_mLamin-647_5_1_01	65.469	21133.5	34042	8	1
092421_W1118_2weeksHSD_RbFOXO-488_mLamin-647_5_1_02	38.6439	20945.2	36101.8	4	1
092421_W1118_2weeksHSD_RbFOXO-488_mLamin-647_5_1_03	82.0791	13423.9	22755.5	13	3
092421_W1118_2weeksHSD_RbFOXO-488_mLamin-647_5_1_04	66.8765	16236.6	26611.8	10	1
092421_W1118_2weeksHSD_RbFOXO-488_mLamin-647_5_1_06	66.087	13657.5	22115.2	11	3
092421_W1118_2weeksHSD_RbFOXO-488_mLamin-647_5_1_07	68.2398	21073.5	33226.3	11	5
092421_W1118_2weeksHSD_RbFOXO-488_mLamin-647_5_1_08	129.075	22763	36028.9	14	1
092421_W1118_2weeksHSD_RbFOXO-488_mLamin-647_5_1_10	57.8285	19697.3	34498.4	7	1
092421_W1118_2weeksHSD_RbFOXO-488_mLamin-647_5_1_11	91.024	14845.6	27223.7	12	1
092421_W1118_2weeksHSD_RbFOXO-488_mLamin-647_5_1_12	49.4328	19037.7	30622.5	7	1
092421_W1118_2weeksHSD_RbFOXO-488_mLamin-647_5_1_13	74.0364	19799.7	33112.4	14	1
092421_W1118_2weeksHSD_RbFOXO-488_mLamin-647_5_1_17	74.0315	13238	23052.7	11	4
092421_W1118_2weeksHSD_RbFOXO-488_mLamin-647_5_1_18	77.2437	18592.2	30361.8	13	1
092421_W1118_2weeksHSD_RbFOXO-488_mLamin-647_5_1_19	97.3846	20002	34268.3	14	1
092421_W1118_2weeksHSD_RbFOXO-488_mLamin-647_5_1_20	62.7914	19588.2	30358.4	12	3
092421_W1118_2weeksHSD_RbFOXO-488_mLamin-647_5_1_21	78.3422	19311.1	30634.8	10	1
092421_W1118_2weeksHSD_RbFOXO-488_mLamin-647_5_1_23	77.1701	18801.9	29041.3	14	2
092421_W1118_2weeksHSD_RbFOXO-488_mLamin-647_5_1_24	84.0848	18736.1	29590.5	11	1
092421_W1118_2weeksHSD_RbFOXO-488_mLamin-647_5_1_27	47.5497	18751.1	31726.1	5	1
092421_W1118_2weeksHSD_RbFOXO-488_mLamin-647_5_1_29	86.7477	18356.8	29685.5	13	3
092421_W1118_2weeksHSD_RbFOXO-488_mLamin-647_5_1_30	60.874	14486.7	22483.3	11	6
092421_W1118_2weeksHSD_RbFOXO-488_mLamin-647_5_1_31	61.0162	20389.7	31994.4	7	1
092421_W1118_2weeksHSD_RbFOXO-488_mLamin-647_5_1_33	88.2238	11090	19278.6	13	5
092421_W1118_2weeksHSD_RbFOXO-488_mLamin-647_5_1_35	79.7349	15124.7	23916.5	11	1
092421_W1118_2weeksHSD_RbFOXO-488_mLamin-647_6_1_01	63.2818	29450.3	50060.9	7	1
092421_W1118_2weeksHSD_RbFOXO-488_mLamin-647_6_1_05	88.4543	21441.3	36017.3	11	1
092421_W1118_2weeksHSD_RbFOXO-488_mLamin-647_6_1_06	92.814	23050.2	46575.6	13	1
092421_W1118_2weeksHSD_RbFOXO-488_mLamin-647_6_1_07	127.594	17901.7	27362	12	3
092421_W1118_2weeksHSD_RbFOXO-488_mLamin-647_6_1_09	67.5533	21002.3	34092.5	10	6
092421_W1118_2weeksHSD_RbFOXO-488_mLamin-647_6_1_13	65.062	31062.2	48944.5	8	1
092421_W1118_2weeksHSD_RbFOXO-488_mLamin-647_6_1_14	106.8	15438.5	26718.4	11	1
092421_W1118_2weeksHSD_RbFOXO-488_mLamin-647_6_1_16	84.5458	29990.2	44132.5	10	1
092421_W1118_2weeksHSD_RbFOXO-488_mLamin-647_6_1_17	82.7166	20222.4	36054.9	11	3
092421_W1118_2weeksHSD_RbFOXO-488_mLamin-647_6_1_18	123.244	24182.1	40484.4	14	1
092421_W1118_2weeksHSD_RbFOXO-488_mLamin-647_6_1_19	89.9353	23978.3	36566	11	1
092421_W1118_2weeksHSD_RbFOXO-488_mLamin-647_6_1_24	95.9134	19046.9	29782	11	1
092421_W1118_2weeksHSD_RbFOXO-488_mLamin-647_6_1_28	71.7119	24558.7	38867.8	11	3
092421_W1118_2weeksHSD_RbFOXO-488_mLamin-647_6_1_34	73.6392	29479.2	48007.1	8	1
092421_W1118_2weeksHSD_RbFOXO-488_mLamin-647_6_1_36	89.0232	14303	23934.8	12	1
092421_W1118_2weeksHSD_RbFOXO-488_mLamin-647_7_1_01	125.892	19389.9	32100.8	11	1
092421_W1118_2weeksHSD_RbFOXO-488_mLamin-647_7_1_02	102.004	16111.3	28052	13	4
092421_W1118_2weeksHSD_RbFOXO-488_mLamin-647_7_1_06	80.0733	22304.9	36919.3	10	1
092421_W1118_2weeksHSD_RbFOXO-488_mLamin-647_7_1_09	68.4115	16550.2	25618	12	6
092421_W1118_2weeksHSD_RbFOXO-488_mLamin-647_7_1_10	77.7488	16858.7	28153	13	6
092421_W1118_2weeksHSD_RbFOXO-488_mLamin-647_7_1_12	39.5413	10191.7	18475.7	11	2
092421_W1118_2weeksHSD_RbFOXO-488_mLamin-647_7_1_13	76.9298	22649.1	34201	12	5
092421_W1118_2weeksHSD_RbFOXO-488_mLamin-647_7_1_16	79.1661	27716.2	43616.2	7	1
092421_W1118_2weeksHSD_RbFOXO-488_mLamin-647_7_1_19	96.752	21140.5	36009.2	11	1
092421_W1118_2weeksHSD_RbFOXO-488_mLamin-647_7_1_22	83.9965	11917.7	20891	13	6
092421_W1118_2weeksHSD_RbFOXO-488_mLamin-647_7_1_26	81.5887	14585.7	23947.6	12	6
092421_W1118_2weeksHSD_RbFOXO-488_mLamin-647_7_1_28	87.0763	21114.1	34371.9	14	2
092421_W1118_2weeksHSD_RbFOXO-488_mLamin-647_7_1_30	63.2328	28204.2	43027	7	1
092421_W1118_2weeksHSD_RbFOXO-488_mLamin-647_7_1_31	108.762	20337.6	33517.6	14	1
092421_W1118_2weeksND_RbFOXO-488_mLamin-647_1_1_04	128.187	13635.4	22991.3	16	6
092421_W1118_2weeksND_RbFOXO-488_mLamin-647_1_1_08	92.6767	19278.8	30504.8	9	6
092421_W1118_2weeksND_RbFOXO-488_mLamin-647_1_1_09	124.877	11927.9	19605.6	15	6
092421_W1118_2weeksND_RbFOXO-488_mLamin-647_1_1_13	122.508	12347.5	20751.1	14	4
092421_W1118_2weeksND_RbFOXO-488_mLamin-647_1_1_22	123.234	23374.4	39222.5	14	1
092421_W1118_2weeksND_RbFOXO-488_mLamin-647_1_1_26	76.41	25845.5	43350.4	14	4
092421_W1118_2weeksND_RbFOXO-488_mLamin-647_1_1_28	114.416	27644.1	48986.6	9	1
092421_W1118_2weeksND_RbFOXO-488_mLamin-647_1_1_29	87.1597	19721.3	31805.9	12	4
092421_W1118_2weeksND_RbFOXO-488_mLamin-647_1_1_34	93.1475	24092.2	40591.8	12	1
092421_W1118_2weeksND_RbFOXO-488_mLamin-647_2_1_02	65.2337	16459.5	27703.9	8	1
092421_W1118_2weeksND_RbFOXO-488_mLamin-647_2_1_04	94.9718	13049.5	20447.5	12	5
092421_W1118_2weeksND_RbFOXO-488_mLamin-647_2_1_05	81.3484	18920.6	30573.3	9	1
092421_W1118_2weeksND_RbFOXO-488_mLamin-647_2_1_06	75.027	15524.6	23023.4	12	6
092421_W1118_2weeksND_RbFOXO-488_mLamin-647_2_1_10	119.114	15842.1	27216.3	11	1
092421_W1118_2weeksND_RbFOXO-488_mLamin-647_2_1_12	70.4319	17004.8	27071	12	1
092421_W1118_2weeksND_RbFOXO-488_mLamin-647_2_1_13	93.4123	16646.2	27125.1	15	2
092421_W1118_2weeksND_RbFOXO-488_mLamin-647_2_1_14	99.4688	20349.3	32484.1	11	1
092421_W1118_2weeksND_RbFOXO-488_mLamin-647_2_1_15	110.321	15086.1	23466.9	15	1
092421_W1118_2weeksND_RbFOXO-488_mLamin-647_2_1_18	74.6838	13357.2	21473.3	12	4
092421_W1118_2weeksND_RbFOXO-488_mLamin-647_2_1_21	125.882	21992.5	35033.3	10	1
092421_W1118_2weeksND_RbFOXO-488_mLamin-647_2_1_28	125.647	13477.9	24864.7	16	1
092421_W1118_2weeksND_RbFOXO-488_mLamin-647_2_1_29	96.8255	15090.6	24141.5	12	4
092421_W1118_2weeksND_RbFOXO-488_mLamin-647_2_1_30	84.1044	17891.9	27473	11	5
092421_W1118_2weeksND_RbFOXO-488_mLamin-647_2_1_33	107.943	13404.5	22209.5	14	5
092421_W1118_2weeksND_RbFOXO-488_mLamin-647_2_1_34	107.629	17412	28188.1	14	1
092421_W1118_2weeksND_RbFOXO-488_mLamin-647_2_1_35	90.4061	16515.8	27338.8	10	1
092421_W1118_2weeksND_RbFOXO-488_mLamin-647_2_1_45	117.614	12924.5	21277	15	3
092421_W1118_2weeksND_RbFOXO-488_mLamin-647_2_1_47	104.123	13618.2	21125	14	4
092421_W1118_2weeksND_RbFOXO-488_mLamin-647_2_1_50	117.869	15698.4	25988.4	15	1
092421_W1118_2weeksND_RbFOXO-488_mLamin-647_3_1_03	107.663	13371	23298.2	9	1
092421_W1118_2weeksND_RbFOXO-488_mLamin-647_3_1_06	95.4818	13734.7	22370	15	5
092421_W1118_2weeksND_RbFOXO-488_mLamin-647_3_1_09	98.8803	12605.4	20780.2	14	5
092421_W1118_2weeksND_RbFOXO-488_mLamin-647_3_1_17	127.716	13853.6	23637	14	1
092421_W1118_2weeksND_RbFOXO-488_mLamin-647_3_1_18	119.914	15442.3	25131	13	1
092421_W1118_2weeksND_RbFOXO-488_mLamin-647_3_1_22	120.89	16169.9	25771.9	13	1
092421_W1118_2weeksND_RbFOXO-488_mLamin-647_3_1_25	87.1204	15736.1	26090.2	10	1
092421_W1118_2weeksND_RbFOXO-488_mLamin-647_4_1_11	102.5	15592.8	26707	10	1
092421_W1118_2weeksND_RbFOXO-488_mLamin-647_4_1_18	121.272	17697.6	27433.2	15	1
092421_W1118_2weeksND_RbFOXO-488_mLamin-647_4_1_22	124.386	14248.2	23129.9	15	1
092421_W1118_2weeksND_RbFOXO-488_mLamin-647_5_1_01	96.5068	18229.6	28255	10	3
092421_W1118_2weeksND_RbFOXO-488_mLamin-647_5_1_08	90.5925	23209.7	37796.5	8	1
092421_W1118_2weeksND_RbFOXO-488_mLamin-647_5_1_10	124.578	20634.7	33522.3	13	1
092421_W1118_2weeksND_RbFOXO-488_mLamin-647_5_1_12	115.544	19002.7	28803.3	13	1
092421_W1118_2weeksND_RbFOXO-488_mLamin-647_5_1_20	110.125	15636.6	25546.9	15	2
092421_W1118_2weeksND_RbFOXO-488_mLamin-647_5_1_21	87.4245	22938.9	38071.4	10	1
092421_W1118_2weeksND_RbFOXO-488_mLamin-647_5_1_33	117.594	19972.2	33966.3	12	6
092421_W1118_2weeksND_RbFOXO-488_mLamin-647_5_1_34	86.2524	19040	34956.6	6	1
092421_W1118_2weeksND_RbFOXO-488_mLamin-647_5_1_37	101.082	25659.4	40447.1	11	1
092421_W1118_2weeksND_RbFOXO-488_mLamin-647_5_1_56	112.131	19129.8	30845.6	13	1
092421_W1118_2weeksND_RbFOXO-488_mLamin-647_5_1_59	113.288	17219.9	27226.1	15	1
092421_W1118_2weeksND_RbFOXO-488_mLamin-647_7_1_10	82.7313	17284.2	27759.4	10	1
092421_W1118_2weeksND_RbFOXO-488_mLamin-647_7_1_11	113.426	15300.6	30247.3	16	1
092421_W1118_2weeksND_RbFOXO-488_mLamin-647_7_1_13	100.729	16442.7	24999.4	11	1
092421_W1118_2weeksND_RbFOXO-488_mLamin-647_7_1_17	92.3776	23093	38343.4	11	1
092421_W1118_2weeksND_RbFOXO-488_mLamin-647_7_1_18	64.4049	11145.4	18513.1	11	3
092421_W1118_2weeksND_RbFOXO-488_mLamin-647_7_1_23	73.2714	10436.5	18798.6	10	3
092421_W1118_2weeksND_RbFOXO-488_mLamin-647_7_1_24	108.541	20365.8	33414	10	2
092421_W1118_2weeksND_RbFOXO-488_mLamin-647_7_1_28	94.3343	15067.8	26765.2	10	2
092421_W1118_2weeksND_RbFOXO-488_mLamin-647_7_1_31	96.0997	10613.4	17888.1	12	1
092421_W1118_2weeksND_RbFOXO-488_mLamin-647_7_1_34	78.8522	21605.3	33680.1	9	1
092421_W1118_2weeksND_RbFOXO-488_mLamin-647_7_1_38	73.2616	12993.6	20390.7	11	3
092421_W1118_2weeksND_RbFOXO-488_mLamin-647_7_1_44	102.813	13487.5	23575.5	13	1
092421_W1118_2weeksND_RbFOXO-488_mLamin-647_7_1_47	109.056	15660.8	26518.9	14	5

## Sheet: 21Days
FOXO Nuclear Localization after 14 days on NF/HSD Diet
ID	NucVol	NucMI	q97	NbSlices	FirstSlice
100521_W1118_3weeksHSD_RbFOXO-488_mLamin-647_1_1_01	77.0034	24712.3	40504.9	11	1
100521_W1118_3weeksHSD_RbFOXO-488_mLamin-647_1_1_03	72.6731	14200.4	27210.9	12	1
100521_W1118_3weeksHSD_RbFOXO-488_mLamin-647_1_1_09	64.8315	15071.6	23478.8	11	5
100521_W1118_3weeksHSD_RbFOXO-488_mLamin-647_1_1_13	101.931	15733.6	27198.9	13	4
100521_W1118_3weeksHSD_RbFOXO-488_mLamin-647_1_1_14	88.2385	16944.5	28962.7	13	4
100521_W1118_3weeksHSD_RbFOXO-488_mLamin-647_1_1_16	114.897	18438.8	32348.8	11	1
100521_W1118_3weeksHSD_RbFOXO-488_mLamin-647_1_1_18	71.0204	22433	35671	13	1
100521_W1118_3weeksHSD_RbFOXO-488_mLamin-647_1_1_19	101.269	18765.6	32255	14	6
100521_W1118_3weeksHSD_RbFOXO-488_mLamin-647_1_1_23	66.4253	17111.8	27966.2	11	3
100521_W1118_3weeksHSD_RbFOXO-488_mLamin-647_1_1_24	92.3089	21558.8	37393.4	13	2
100521_W1118_3weeksHSD_RbFOXO-488_mLamin-647_1_1_28	85.1294	17866.3	30494.5	12	5
100521_W1118_3weeksHSD_RbFOXO-488_mLamin-647_1_1_33	114.833	15421.9	26857.2	13	6
100521_W1118_3weeksHSD_RbFOXO-488_mLamin-647_1_1_35	61.6488	20335.4	30859.4	11	3
100521_W1118_3weeksHSD_RbFOXO-488_mLamin-647_1_1_37	65.6113	16993.6	27388.3	13	2
100521_W1118_3weeksHSD_RbFOXO-488_mLamin-647_1_1_39	88.3906	17075	26170.1	12	6
100521_W1118_3weeksHSD_RbFOXO-488_mLamin-647_1_1_40	125.338	14820.1	25568.8	14	5
100521_W1118_3weeksHSD_RbFOXO-488_mLamin-647_2_1_01	58.3239	31744.9	47752.3	8	1
100521_W1118_3weeksHSD_RbFOXO-488_mLamin-647_2_1_02	56.7595	31032.3	54571.4	7	1
100521_W1118_3weeksHSD_RbFOXO-488_mLamin-647_2_1_04	79.9115	28312.5	43032.3	12	1
100521_W1118_3weeksHSD_RbFOXO-488_mLamin-647_2_1_06	44.0236	26910.8	44193.9	7	1
100521_W1118_3weeksHSD_RbFOXO-488_mLamin-647_2_1_07	63.3211	21455.2	36598	8	1
100521_W1118_3weeksHSD_RbFOXO-488_mLamin-647_2_1_08	74.3895	24200.7	35251.3	12	1
100521_W1118_3weeksHSD_RbFOXO-488_mLamin-647_2_1_09	112.695	25477.4	42062.4	14	1
100521_W1118_3weeksHSD_RbFOXO-488_mLamin-647_2_1_11	53.6405	29970.9	49794.3	6	1
100521_W1118_3weeksHSD_RbFOXO-488_mLamin-647_2_1_14	82.4125	37919.2	56866.1	8	1
100521_W1118_3weeksHSD_RbFOXO-488_mLamin-647_2_1_16	57.5784	41115	65535	7	1
100521_W1118_3weeksHSD_RbFOXO-488_mLamin-647_2_1_17	57.7844	35307.8	59154.1	9	1
100521_W1118_3weeksHSD_RbFOXO-488_mLamin-647_2_1_18	55.9258	32755.5	55105.4	7	1
100521_W1118_3weeksHSD_RbFOXO-488_mLamin-647_2_1_19	55.1656	24770.4	37973.6	12	4
100521_W1118_3weeksHSD_RbFOXO-488_mLamin-647_2_1_21	125.274	34544.6	55191	14	1
100521_W1118_3weeksHSD_RbFOXO-488_mLamin-647_2_1_24	92.613	36119.5	53932.8	9	1
100521_W1118_3weeksHSD_RbFOXO-488_mLamin-647_2_1_25	65.0914	30234	51940.2	10	1
100521_W1118_3weeksHSD_RbFOXO-488_mLamin-647_3_1_02	63.7036	28835	47722.8	9	1
100521_W1118_3weeksHSD_RbFOXO-488_mLamin-647_3_1_03	58.4415	24791.6	39115	10	1
100521_W1118_3weeksHSD_RbFOXO-488_mLamin-647_3_1_07	56.3426	18704.5	28865.3	10	4
100521_W1118_3weeksHSD_RbFOXO-488_mLamin-647_3_1_11	61.7076	20473.5	35161.1	11	4
100521_W1118_3weeksHSD_RbFOXO-488_mLamin-647_3_1_12	65.8712	27912.1	46945.2	9	1
100521_W1118_3weeksHSD_RbFOXO-488_mLamin-647_3_1_13	56.4603	24644.5	38167.2	11	2
100521_W1118_3weeksHSD_RbFOXO-488_mLamin-647_3_1_17	68.4752	22076.9	36766.6	11	3
100521_W1118_3weeksHSD_RbFOXO-488_mLamin-647_3_1_20	60.717	29296.4	47950	11	1
100521_W1118_3weeksHSD_RbFOXO-488_mLamin-647_3_1_21	58.672	22273.2	36909.1	12	4
100521_W1118_3weeksHSD_RbFOXO-488_mLamin-647_3_1_27	64.4833	25069.1	42316.3	10	1
100521_W1118_3weeksHSD_RbFOXO-488_mLamin-647_3_1_31	115.172	18113.3	34459.8	12	1
100521_W1118_3weeksHSD_RbFOXO-488_mLamin-647_3_1_32	57.8923	26927.8	43319.2	11	1
100521_W1118_3weeksHSD_RbFOXO-488_mLamin-647_4_1_01	112.038	22894.4	37903.5	16	1
100521_W1118_3weeksHSD_RbFOXO-488_mLamin-647_4_1_02	66.1703	33900.6	53865.1	10	1
100521_W1118_3weeksHSD_RbFOXO-488_mLamin-647_4_1_04	66.798	26748.9	46155.2	7	1
100521_W1118_3weeksHSD_RbFOXO-488_mLamin-647_4_1_05	62.6198	11358.1	20478.7	10	5
100521_W1118_3weeksHSD_RbFOXO-488_mLamin-647_4_1_10	53.4541	21186.6	34352.5	10	1
100521_W1118_3weeksHSD_RbFOXO-488_mLamin-647_4_1_11	52.3262	18080.8	32181.8	10	1
100521_W1118_3weeksHSD_RbFOXO-488_mLamin-647_4_1_15	66.0722	30177.4	50107.6	7	1
100521_W1118_3weeksHSD_RbFOXO-488_mLamin-647_4_1_19	53.8317	19963.5	37188.8	11	2
100521_W1118_3weeksHSD_RbFOXO-488_mLamin-647_4_1_20	76.2138	22306.9	37352.3	11	1
100521_W1118_3weeksHSD_RbFOXO-488_mLamin-647_4_1_22	53.4639	27181.6	47425.2	7	1
100521_W1118_3weeksHSD_RbFOXO-488_mLamin-647_4_1_23	81.5887	15922.1	30198.4	17	4
100521_W1118_3weeksHSD_RbFOXO-488_mLamin-647_4_1_24	59.7951	20878.7	35620.5	11	2
100521_W1118_3weeksHSD_RbFOXO-488_mLamin-647_4_1_25	64.4196	24000.9	41383.8	11	2
100521_W1118_3weeksHSD_RbFOXO-488_mLamin-647_4_1_26	55.6217	21970.6	39120	11	1
100521_W1118_3weeksHSD_RbFOXO-488_mLamin-647_4_1_29	54.4595	23497.7	40550.6	9	1
100521_W1118_3weeksHSD_RbFOXO-488_mLamin-647_4_1_31	77.9793	13800.6	24203.8	12	3
100521_W1118_3weeksHSD_RbFOXO-488_mLamin-647_4_1_33	72.3739	18506.5	32869.4	11	2
100521_W1118_3weeksHSD_RbFOXO-488_mLamin-647_5_1_02	99.6405	13810.2	28370.8	15	3
100521_W1118_3weeksHSD_RbFOXO-488_mLamin-647_5_1_03	69.8778	20035.8	36833.1	13	1
100521_W1118_3weeksHSD_RbFOXO-488_mLamin-647_5_1_06	58.7015	22371.5	37659.8	11	4
100521_W1118_3weeksHSD_RbFOXO-488_mLamin-647_5_1_07	64.1253	16629.4	29297	12	1
100521_W1118_3weeksHSD_RbFOXO-488_mLamin-647_5_1_09	85.7473	19354.3	36088.5	16	3
100521_W1118_3weeksHSD_RbFOXO-488_mLamin-647_5_1_11	55.1166	21129.4	34143.3	9	4
100521_W1118_3weeksHSD_RbFOXO-488_mLamin-647_5_1_14	68.8577	24456.9	41568	11	1
100521_W1118_3weeksHSD_RbFOXO-488_mLamin-647_5_1_15	58.162	14357.1	25891	12	4
100521_W1118_3weeksHSD_RbFOXO-488_mLamin-647_5_1_18	54.8665	15195.2	26128.7	11	6
100521_W1118_3weeksHSD_RbFOXO-488_mLamin-647_5_1_21	65.6652	19373.3	33234.8	12	4
100521_W1118_3weeksHSD_RbFOXO-488_mLamin-647_5_1_22	44.9701	17945.9	30986.6	12	5
100521_W1118_3weeksHSD_RbFOXO-488_mLamin-647_5_1_23	55.0921	14677	26172.4	11	6
100521_W1118_3weeksHSD_RbFOXO-488_mLamin-647_5_1_24	85.5266	19693	31538.4	13	4
100521_W1118_3weeksHSD_RbFOXO-488_mLamin-647_5_1_25	43.3616	10339.4	20582.7	9	1
100521_W1118_3weeksHSD_RbFOXO-488_mLamin-647_5_1_26	59.1575	27742.1	46868.8	11	1
100521_W1118_3weeksHSD_RbFOXO-488_mLamin-647_5_1_27	66.5774	22511.3	39983.2	12	4
100521_W1118_3weeksHSD_RbFOXO-488_mLamin-647_5_1_30	69.0245	25290	42835.5	9	1
100521_W1118_3weeksHSD_RbFOXO-488_mLamin-647_5_1_31	85.6443	12744.9	24893.8	12	6
100521_W1118_3weeksHSD_RbFOXO-488_mLamin-647_5_1_32	49.2072	9661.92	19452.6	8	1
100521_W1118_3weeksHSD_RbFOXO-488_mLamin-647_5_1_37	58.8682	16851.6	28207.1	11	6
100521_W1118_3weeksHSD_RbFOXO-488_mLamin-647_6_1_04	51.6642	28279.7	44023.2	8	1
100521_W1118_3weeksHSD_RbFOXO-488_mLamin-647_6_1_05	68.1957	25333.6	41892	9	1
100521_W1118_3weeksHSD_RbFOXO-488_mLamin-647_6_1_08	53.3904	26255.4	42431	8	1
100521_W1118_3weeksHSD_RbFOXO-488_mLamin-647_6_1_09	52.1349	28145.3	46245.7	9	1
100521_W1118_3weeksHSD_RbFOXO-488_mLamin-647_6_1_11	52.8411	26679	40573.2	10	1
100521_W1118_3weeksHSD_RbFOXO-488_mLamin-647_6_1_15	105.815	29035.8	45462.3	12	1
100521_W1118_3weeksHSD_RbFOXO-488_mLamin-647_6_1_18	79.627	26770	43032.3	9	1
100521_W1118_3weeksHSD_RbFOXO-488_mLamin-647_6_1_19	95.8938	21525.6	35522	12	6
100521_W1118_3weeksHSD_RbFOXO-488_mLamin-647_6_1_21	53.003	21788.4	39465.9	8	1
100521_W1118_3weeksHSD_RbFOXO-488_mLamin-647_6_1_23	51.5857	18347.9	29240.6	10	5
100521_W1118_3weeksHSD_RbFOXO-488_mLamin-647_6_1_25	89.4597	26170.9	44017.2	9	1
100521_W1118_3weeksHSD_RbFOXO-488_mLamin-647_6_1_27	53.3708	23975.6	38283.1	9	1
100521_W1118_3weeksHSD_RbFOXO-488_mLamin-647_7_1_02	58.7358	9282.56	17293	11	1
100521_W1118_3weeksHSD_RbFOXO-488_mLamin-647_7_1_05	114.872	10881.1	19232.1	13	6
100521_W1118_3weeksHSD_RbFOXO-488_mLamin-647_7_1_10	120.007	17203.1	27101.4	12	1
100521_W1118_3weeksHSD_RbFOXO-488_mLamin-647_7_1_11	56.0533	17134.6	34521.4	11	2
100521_W1118_3weeksHSD_RbFOXO-488_mLamin-647_7_1_12	72.4181	11422	17608	12	6
100521_W1118_3weeksHSD_RbFOXO-488_mLamin-647_7_1_13	77.0524	24382.3	40471.7	9	1
100521_W1118_3weeksHSD_RbFOXO-488_mLamin-647_7_1_15	64.8659	27231.5	42425.8	9	1
100521_W1118_3weeksHSD_RbFOXO-488_mLamin-647_7_1_16	101.524	22651.8	38733.3	10	1
100521_W1118_3weeksHSD_RbFOXO-488_mLamin-647_7_1_19	72.6241	26993.4	40086.1	7	3
100521_W1118_3weeksHSD_RbFOXO-488_mLamin-647_7_1_20	100.415	27238.3	42299.4	10	1
100521_W1118_3weeksND_RbFOXO-488_mLamin-647_1_1_01	100.185	24500.6	39682.5	10	2
100521_W1118_3weeksND_RbFOXO-488_mLamin-647_1_1_04	74.316	27347.3	41891.4	11	2
100521_W1118_3weeksND_RbFOXO-488_mLamin-647_1_1_07	74.7965	22335.8	32309.9	11	4
100521_W1118_3weeksND_RbFOXO-488_mLamin-647_1_1_11	80.7746	31043.7	46605	10	1
100521_W1118_3weeksND_RbFOXO-488_mLamin-647_1_1_12	61.4036	29340.8	48480	8	1
100521_W1118_3weeksND_RbFOXO-488_mLamin-647_1_1_13	72.3641	32881.5	51463.5	8	1
100521_W1118_3weeksND_RbFOXO-488_mLamin-647_1_1_15	84.8646	28247.1	44067.7	11	1
100521_W1118_3weeksND_RbFOXO-488_mLamin-647_1_1_17	91.4164	32023.7	51718.3	11	1
100521_W1118_3weeksND_RbFOXO-488_mLamin-647_1_1_18	125.455	29778.5	44297.1	13	1
100521_W1118_3weeksND_RbFOXO-488_mLamin-647_1_1_20	80.1322	30775.9	48025.3	11	1
100521_W1118_3weeksND_RbFOXO-488_mLamin-647_1_1_22	106.643	28746.4	45798.1	12	1
100521_W1118_3weeksND_RbFOXO-488_mLamin-647_1_1_23	116.839	29830.9	49951.2	11	2
100521_W1118_3weeksND_RbFOXO-488_mLamin-647_1_1_25	123.641	17925.2	28620.1	12	5
100521_W1118_3weeksND_RbFOXO-488_mLamin-647_1_1_27	92.8631	30311.7	46785.1	10	1
100521_W1118_3weeksND_RbFOXO-488_mLamin-647_1_1_28	68.0044	25774.9	41125.9	11	5
100521_W1118_3weeksND_RbFOXO-488_mLamin-647_1_1_29	115.196	20319	32161.6	10	4
100521_W1118_3weeksND_RbFOXO-488_mLamin-647_1_1_30	84.3938	19963.9	31576.6	10	1
100521_W1118_3weeksND_RbFOXO-488_mLamin-647_1_1_33	124.18	29863.3	48052.5	9	1
100521_W1118_3weeksND_RbFOXO-488_mLamin-647_2_1_02	57.6177	34745.3	54063.3	9	1
100521_W1118_3weeksND_RbFOXO-488_mLamin-647_2_1_06	66.8569	30914.8	47335.5	7	1
100521_W1118_3weeksND_RbFOXO-488_mLamin-647_2_1_07	85.3108	29132.7	44818.6	7	3
100521_W1118_3weeksND_RbFOXO-488_mLamin-647_2_1_14	67.8132	35654	55101	9	1
100521_W1118_3weeksND_RbFOXO-488_mLamin-647_2_1_15	65.7829	38464.1	56933.4	9	4
100521_W1118_3weeksND_RbFOXO-488_mLamin-647_2_1_16	110.145	38333.5	56013.5	6	1
100521_W1118_3weeksND_RbFOXO-488_mLamin-647_2_1_19	79.4946	32608.6	56359	14	1
100521_W1118_3weeksND_RbFOXO-488_mLamin-647_2_1_20	81.0541	31380.3	47826.6	8	1
100521_W1118_3weeksND_RbFOXO-488_mLamin-647_2_1_22	114.544	37481.2	54248.6	13	1
100521_W1118_3weeksND_RbFOXO-488_mLamin-647_2_1_24	48.1087	42869.4	63223.8	10	1
100521_W1118_3weeksND_RbFOXO-488_mLamin-647_2_1_25	62.9827	37196.9	56391.2	9	1
100521_W1118_3weeksND_RbFOXO-488_mLamin-647_2_1_26	49.6192	40248.2	59380.9	6	1
100521_W1118_3weeksND_RbFOXO-488_mLamin-647_2_1_28	55.4354	39068.5	56333	9	1
100521_W1118_3weeksND_RbFOXO-488_mLamin-647_2_1_31	53.0471	39700.5	62442	7	1
100521_W1118_3weeksND_RbFOXO-488_mLamin-647_2_1_32	39.7767	33012.1	52022	8	6
100521_W1118_3weeksND_RbFOXO-488_mLamin-647_2_1_35	55.0038	43080.3	62492	7	1
100521_W1118_3weeksND_RbFOXO-488_mLamin-647_2_1_38	53.1697	41951.6	65535	6	1
100521_W1118_3weeksND_RbFOXO-488_mLamin-647_2_1_39	56.1023	35277.3	58788.1	6	1
100521_W1118_3weeksND_RbFOXO-488_mLamin-647_2_1_40	69.304	33054.2	51299.1	8	1
100521_W1118_3weeksND_RbFOXO-488_mLamin-647_2_1_43	83.1629	34236.3	60563.1	12	4
100521_W1118_3weeksND_RbFOXO-488_mLamin-647_2_1_44	77.8322	42068.4	64974.7	9	1
100521_W1118_3weeksND_RbFOXO-488_mLamin-647_2_1_48	91.6763	26287.3	45102.1	12	5
100521_W1118_3weeksND_RbFOXO-488_mLamin-647_2_1_50	46.819	18809.6	38607.2	6	1
100521_W1118_3weeksND_RbFOXO-488_mLamin-647_2_1_51	88.0424	40507.2	60922	10	1
100521_W1118_3weeksND_RbFOXO-488_mLamin-647_2_1_52	49.4279	40762.7	63484.9	7	1
100521_W1118_3weeksND_RbFOXO-488_mLamin-647_2_1_53	69.6865	37814.8	58786.6	9	2
100521_W1118_3weeksND_RbFOXO-488_mLamin-647_2_1_54	61.5409	36180.3	56641	11	2
100521_W1118_3weeksND_RbFOXO-488_mLamin-647_2_1_55	114.519	35601.4	63002.9	15	1
100521_W1118_3weeksND_RbFOXO-488_mLamin-647_2_1_58	79.8575	32760.6	47434.6	10	2
100521_W1118_3weeksND_RbFOXO-488_mLamin-647_2_1_62	59.6234	40112.3	63038.2	8	1
100521_W1118_3weeksND_RbFOXO-488_mLamin-647_3_1_01	49.8153	7079.4	13929.6	9	5
100521_W1118_3weeksND_RbFOXO-488_mLamin-647_3_1_02	122.008	16475.1	24386.3	14	1
100521_W1118_3weeksND_RbFOXO-488_mLamin-647_3_1_03	62.4383	20128	33027.2	11	1
100521_W1118_3weeksND_RbFOXO-488_mLamin-647_3_1_07	99.5669	16571.3	24919.8	10	1
100521_W1118_3weeksND_RbFOXO-488_mLamin-647_3_1_09	41.4735	17299.2	27932.6	7	1
100521_W1118_3weeksND_RbFOXO-488_mLamin-647_3_1_10	122.42	13445.9	23918.1	14	1
100521_W1118_3weeksND_RbFOXO-488_mLamin-647_3_1_11	49.1091	13551.5	20242.6	7	4
100521_W1118_3weeksND_RbFOXO-488_mLamin-647_3_1_12	111.469	14062.6	21905.2	15	1
100521_W1118_3weeksND_RbFOXO-488_mLamin-647_3_1_13	82.7411	14466.2	22099.4	11	6
100521_W1118_3weeksND_RbFOXO-488_mLamin-647_3_1_14	73.5313	17623.6	27727	10	1
100521_W1118_3weeksND_RbFOXO-488_mLamin-647_3_1_15	114.024	14772.9	24392	14	1
100521_W1118_3weeksND_RbFOXO-488_mLamin-647_3_1_17	69.3972	17501.2	25242.9	10	1
100521_W1118_3weeksND_RbFOXO-488_mLamin-647_3_1_19	57.7157	19373.1	29537.3	8	1
100521_W1118_3weeksND_RbFOXO-488_mLamin-647_3_1_21	93.1524	12968.7	24614.3	15	1
100521_W1118_3weeksND_RbFOXO-488_mLamin-647_3_1_22	56.2543	18500.5	27504.2	7	1
100521_W1118_3weeksND_RbFOXO-488_mLamin-647_3_1_24	98.3017	13798.5	25984.1	13	1
100521_W1118_3weeksND_RbFOXO-488_mLamin-647_3_1_25	30.7337	20790	31626.3	5	1
100521_W1118_3weeksND_RbFOXO-488_mLamin-647_3_1_27	75.5322	16782.3	25788.9	11	1
100521_W1118_3weeksND_RbFOXO-488_mLamin-647_3_1_30	52.0614	15779.2	23803	8	1
100521_W1118_3weeksND_RbFOXO-488_mLamin-647_3_1_31	61.487	14986.8	23240	10	1
100521_W1118_3weeksND_RbFOXO-488_mLamin-647_3_1_32	70.633	16980.7	25924	12	1
100521_W1118_3weeksND_RbFOXO-488_mLamin-647_3_1_33	68.1025	21376.7	32485.3	7	1
100521_W1118_3weeksND_RbFOXO-488_mLamin-647_3_1_34	35.7064	24991	35190.6	3	1
100521_W1118_3weeksND_RbFOXO-488_mLamin-647_3_1_35	107.369	11574.1	17425	15	6
100521_W1118_3weeksND_RbFOXO-488_mLamin-647_3_1_36	53.5816	19727.9	34028.3	6	1
100521_W1118_3weeksND_RbFOXO-488_mLamin-647_3_1_37	66.4597	14561.5	22357.9	9	1
100521_W1118_3weeksND_RbFOXO-488_mLamin-647_3_1_39	75.2036	16147	24833.3	11	1
100521_W1118_3weeksND_RbFOXO-488_mLamin-647_3_1_40	75.9588	14004	21821.3	10	1
100521_W1118_3weeksND_RbFOXO-488_mLamin-647_3_1_41	62.8748	14693.4	22269.6	10	1
100521_W1118_3weeksND_RbFOXO-488_mLamin-647_3_1_42	79.3573	14236.4	22384.1	12	1
100521_W1118_3weeksND_RbFOXO-488_mLamin-647_3_1_43	118.089	20230	31270.1	11	3
100521_W1118_3weeksND_RbFOXO-488_mLamin-647_3_1_44	41.8953	22863.8	33167.5	4	1
100521_W1118_3weeksND_RbFOXO-488_mLamin-647_3_1_45	61.2221	13999.9	21065.9	8	1
100521_W1118_3weeksND_RbFOXO-488_mLamin-647_3_1_47	66.5479	17502.6	26288.2	7	1
100521_W1118_3weeksND_RbFOXO-488_mLamin-647_3_1_48	33.8674	25825.3	36532.2	5	1
100521_W1118_3weeksND_RbFOXO-488_mLamin-647_3_1_49	77.4153	14589.7	22027.9	10	1
100521_W1118_3weeksND_RbFOXO-488_mLamin-647_3_1_51	74.213	22761.2	33164.7	7	2
100521_W1118_3weeksND_RbFOXO-488_mLamin-647_3_1_52	55.6708	19232	30328.5	6	1
100521_W1118_3weeksND_RbFOXO-488_mLamin-647_3_1_53	55.9895	19053.7	28879.9	8	1
100521_W1118_3weeksND_RbFOXO-488_mLamin-647_3_1_54	55.2441	14289.6	23013.7	7	1
100521_W1118_3weeksND_RbFOXO-488_mLamin-647_3_1_55	57.7599	15262.8	23184.6	9	1
100521_W1118_3weeksND_RbFOXO-488_mLamin-647_3_1_56	91.9852	12380.4	19054	13	6
100521_W1118_3weeksND_RbFOXO-488_mLamin-647_3_1_59	78.2294	11412.2	17870.8	12	4
100521_W1118_3weeksND_RbFOXO-488_mLamin-647_3_1_62	129.952	12177.9	18653.1	15	5
100521_W1118_3weeksND_RbFOXO-488_mLamin-647_3_1_63	73.6098	10475.4	16279.4	12	5
100521_W1118_3weeksND_RbFOXO-488_mLamin-647_3_1_64	84.3251	13489.2	20358.6	13	2
100521_W1118_3weeksND_RbFOXO-488_mLamin-647_3_1_65	69.9955	13506.8	24113.6	10	1
100521_W1118_3weeksND_RbFOXO-488_mLamin-647_3_1_67	43.7784	15540.1	24371.6	7	1
100521_W1118_3weeksND_RbFOXO-488_mLamin-647_3_1_69	83.9965	14057.7	22298	13	1
100521_W1118_3weeksND_RbFOXO-488_mLamin-647_4_1_06	90.0874	20435.3	33747	11	1
100521_W1118_3weeksND_RbFOXO-488_mLamin-647_4_1_09	127.339	30156.3	47841.6	11	1
100521_W1118_3weeksND_RbFOXO-488_mLamin-647_4_1_12	92.868	20154.9	33224.5	12	3
100521_W1118_3weeksND_RbFOXO-488_mLamin-647_4_1_19	128.589	23637.3	36249.7	12	1
100521_W1118_3weeksND_RbFOXO-488_mLamin-647_4_1_20	124.22	23971	38365.6	11	1
100521_W1118_3weeksND_RbFOXO-488_mLamin-647_4_1_23	74.2228	26753.6	42407.2	11	1
100521_W1118_3weeksND_RbFOXO-488_mLamin-647_4_1_26	123.023	25464.2	43706.7	10	2
100521_W1118_3weeksND_RbFOXO-488_mLamin-647_4_1_29	34.1714	18722.4	28567.8	5	3
100521_W1118_3weeksND_RbFOXO-488_mLamin-647_4_1_32	77.8812	20691	30203.8	11	6
100521_W1118_3weeksND_RbFOXO-488_mLamin-647_4_1_33	63.3015	22067.3	35136	8	1
100521_W1118_3weeksND_RbFOXO-488_mLamin-647_4_1_34	79.9262	26164	39945.9	12	3
100521_W1118_3weeksND_RbFOXO-488_mLamin-647_4_1_38	106.599	29691.6	47153.4	9	1
100521_W1118_3weeksND_RbFOXO-488_mLamin-647_4_1_40	38.5605	33894.8	55043.8	6	1
100521_W1118_3weeksND_RbFOXO-488_mLamin-647_4_1_41	83.8985	20159.1	32675.5	10	1
100521_W1118_3weeksND_RbFOXO-488_mLamin-647_4_1_49	68.5243	25494.3	40988.5	9	1
100521_W1118_3weeksND_RbFOXO-488_mLamin-647_5_1_02	102.941	15892.8	25361.8	10	1
100521_W1118_3weeksND_RbFOXO-488_mLamin-647_5_1_04	78.9846	20581.8	34161.9	9	1
100521_W1118_3weeksND_RbFOXO-488_mLamin-647_5_1_05	73.7863	15698.3	24874.3	12	6
100521_W1118_3weeksND_RbFOXO-488_mLamin-647_5_1_06	47.6428	18413.3	31088	6	1
100521_W1118_3weeksND_RbFOXO-488_mLamin-647_5_1_07	88.6701	14906.2	24169.9	11	3
100521_W1118_3weeksND_RbFOXO-488_mLamin-647_5_1_09	80.1616	19677.5	31152.3	11	1
100521_W1118_3weeksND_RbFOXO-488_mLamin-647_5_1_10	76.871	19532.3	31516.2	9	1
100521_W1118_3weeksND_RbFOXO-488_mLamin-647_5_1_14	114.436	19872.5	36499.2	15	1
100521_W1118_3weeksND_RbFOXO-488_mLamin-647_5_1_16	127.211	23238.1	36446.2	10	1
100521_W1118_3weeksND_RbFOXO-488_mLamin-647_5_1_19	65.0571	18965.4	30994.1	10	3
100521_W1118_3weeksND_RbFOXO-488_mLamin-647_5_1_22	66.8422	24262.3	37681.6	8	1
100521_W1118_3weeksND_RbFOXO-488_mLamin-647_5_1_26	65.013	23085.2	36911.7	10	4
100521_W1118_3weeksND_RbFOXO-488_mLamin-647_5_1_29	121.983	24282.5	42469.6	15	1
100521_W1118_3weeksND_RbFOXO-488_mLamin-647_5_1_30	34.3185	15380.8	26017.9	9	2
100521_W1118_3weeksND_RbFOXO-488_mLamin-647_5_1_36	71.4716	28347	46843.2	7	1
100521_W1118_3weeksND_RbFOXO-488_mLamin-647_5_1_39	69.3432	22987.6	37130.1	9	1
100521_W1118_3weeksND_RbFOXO-488_mLamin-647_5_1_41	84.7174	28803.5	47505.5	9	1
100521_W1118_3weeksND_RbFOXO-488_mLamin-647_5_1_44	70.8096	22997.7	35943.3	10	4
100521_W1118_3weeksND_RbFOXO-488_mLamin-647_5_1_45	93.2358	20852.1	36749.5	15	4
100521_W1118_3weeksND_RbFOXO-488_mLamin-647_5_1_55	81.9712	25835.7	40583.2	10	1
100521_W1118_3weeksND_RbFOXO-488_mLamin-647_5_1_57	75.6204	22259.4	35643.8	10	1
100521_W1118_3weeksND_RbFOXO-488_mLamin-647_5_1_59	73.9727	28179.3	44658.9	8	1
100521_W1118_3weeksND_RbFOXO-488_mLamin-647_6_1_01	79.2641	31036.5	49528.8	9	1
100521_W1118_3weeksND_RbFOXO-488_mLamin-647_6_1_02	99.6012	35953.5	57571.8	9	1
100521_W1118_3weeksND_RbFOXO-488_mLamin-647_6_1_03	72.0944	34852.4	56512.9	10	1
100521_W1118_3weeksND_RbFOXO-488_mLamin-647_6_1_04	57.2989	29868.5	48567	6	1
100521_W1118_3weeksND_RbFOXO-488_mLamin-647_6_1_09	75.4929	28665	45804.4	11	3
100521_W1118_3weeksND_RbFOXO-488_mLamin-647_6_1_11	77.6654	26167.3	41798.5	10	6
100521_W1118_3weeksND_RbFOXO-488_mLamin-647_6_1_13	75.4635	20512.6	37820.7	9	4
100521_W1118_3weeksND_RbFOXO-488_mLamin-647_6_1_14	88.5181	34776.7	55425	10	2
100521_W1118_3weeksND_RbFOXO-488_mLamin-647_6_1_16	85.1686	34715.4	58920.9	9	1
100521_W1118_3weeksND_RbFOXO-488_mLamin-647_6_1_18	36.3537	18194.8	48155.2	5	3
100521_W1118_3weeksND_RbFOXO-488_mLamin-647_6_1_19	69.0098	23990.7	39102	13	1
100521_W1118_3weeksND_RbFOXO-488_mLamin-647_6_1_20	55.4991	25323.6	41131.7	6	3
100521_W1118_3weeksND_RbFOXO-488_mLamin-647_6_1_24	71.7168	22719.4	36220.6	8	6
100521_W1118_3weeksND_RbFOXO-488_mLamin-647_6_1_25	63.3309	25259.7	38315.2	10	6
100521_W1118_3weeksND_RbFOXO-488_mLamin-647_6_1_27	51.4042	28317.1	50658.1	10	1
100521_W1118_3weeksND_RbFOXO-488_mLamin-647_6_1_28	71.4667	39146.2	64116.4	8	1
100521_W1118_3weeksND_RbFOXO-488_mLamin-647_6_1_29	47.7262	25102.9	42955.6	8	3
100521_W1118_3weeksND_RbFOXO-488_mLamin-647_6_1_33	41.0469	12818.6	23081.8	10	6
100521_W1118_3weeksND_RbFOXO-488_mLamin-647_6_1_34	52.5126	29914.7	48991.6	6	1
100521_W1118_3weeksND_RbFOXO-488_mLamin-647_6_1_36	118.045	21402.6	38560.2	16	1
100521_W1118_3weeksND_RbFOXO-488_mLamin-647_6_1_39	77.6164	34909.7	62160.1	8	3
100521_W1118_3weeksND_RbFOXO-488_mLamin-647_6_1_41	56.0484	36172.4	61149.8	8	1
100521_W1118_3weeksND_RbFOXO-488_mLamin-647_6_1_44	110.297	22242.3	35830.8	10	1
100521_W1118_3weeksND_RbFOXO-488_mLamin-647_6_1_45	58.6966	18145	29825.2	12	5
100521_W1118_3weeksND_RbFOXO-488_mLamin-647_6_1_46	98.7675	25441.4	41543.7	12	3
100521_W1118_3weeksND_RbFOXO-488_mLamin-647_6_1_47	77.6066	24705	40338.5	11	5
100521_W1118_3weeksND_RbFOXO-488_mLamin-647_6_1_49	69.4364	24783.1	41258.1	9	1
100521_W1118_3weeksND_RbFOXO-488_mLamin-647_6_1_50	103.946	30727.6	48504.6	11	6
100521_W1118_3weeksND_RbFOXO-488_mLamin-647_6_1_52	77.8273	18732.5	30649.8	12	4
100521_W1118_3weeksND_RbFOXO-488_mLamin-647_6_1_55	62.9533	37307.7	61115.1	7	1
