# Supplementary material for: Fat body phospholipid state dictates hunger-driven feeding behavior
Source: eLife journal article supplement (doi:10.7554/elife.80282), 2022-10-06
Supplement: supp [file elife-80282-supp-v1.zip › elife_poa_e80282_Figure_3_source_data_1.xlsx]

## Sheet: Key-to-Lipidomics-Data
	Lipids data is provided in six different worksheets. The details of the data in each sheet is as follows:
	Sheet 1 Lipid Species Concentrations																					Sample	Treatment				All samples were treated on diet for 7 days
		This sheet provides comprehensive list of various lipids from 13 different lipid classes and their absolute concentrations. The concentrations are expressed in nmol/g of plasma (µM)*																				R-00	Negative control				All samples contained n=10 whole flies
		Note: Each of your samples was added with a set of representative isotope labeled lipids for each class to obtain the absolute concentrations.																				QC-06430	Quality Control (QC)				All samples are W1118
													*for tissue samples, multiply by 25 and divide by mg of sample									R-01	Normal Fed 7 days (NF 7d)
		The names of the 13 Lipid classes are:				Abbreviation	Lipid class															R-02	High Sugar Diet 7 days (HSD 7d)
					1	CE	Cholesterol Ester															R-03	NF 7d
					2	CER	Ceramides															R-04	NF 7d
					3	DAG	Diacylglycerol															R-05	NF 7d
					4	DCER	Dihydroceramides															R-06	NF 7d
					5	FFA	Free fatty Acids															R-07	HSD 7d
					6	HCER	Hexosylceramides															R-08	HSD 7d
					7	LCER	Lactosylceramide															R-09	NF 7d
					8	LPC	Lysophosphatidylcholine															R-10	HSD 7d
					9	LPE	Lysophosphatidylethanolamine															QC-06431	QC
					10	PC	Phosphatidylcholine															R-11	NF 7d
					11	PE	Phosphatidylethanolamine															R-12	HSD 7d
					12	SM	Sphingomyelin															R-13	HSD 7d
					13	TAG	Triacylglycerol															R-14	NF 7d
																						R-15	HSD 7d
																						R-16	HSD 7d
	Sheet 2 Lipid Species Composition																					R-17	NF 7d
		In this sheet, each lipid in sheet 1 is expressed in % composition and is calculated as follows:																				R-18	HSD 7d
			Composition (%)	=	(lipid concentration /sum of all lipids concentration from that class)*100																	R-19	HSD 7d
																						R-20	NF 7d
																						QC-06432	QC
	Sheet 3 Lipid Class Concentration
		This sheet provides total concentration for each of the 13 lipid classes. These are obtained by summing up individual lipid concentrations for the respective class in sheet 1.
	Sheet 4 Lipid Class Composition
		This sheet shows % composition for each of the 13 lipid classes.
		Note: Sum of % composition of all 13 lipid classes is 100.
	Sheet 5 Fatty Acid Concentration
		This sheet sums the concentrations for all fatty acids that are the same in one lipid class.
		For example: PC(FA18:1) is the sum of the concentrations of PC(12:0/18:1), PC(14:0/18:1), PC(15:0/18:1), etc for all PC(x/18:1)
	Sheet 6 Fatty Acid Composition
		In this sheet, each fatty acid in sheet 5 is expressed in % composition and is calculated as follows
			Composition (%)	=	(fatty acid concentration /sum of all fatty acids concentration from that class)*100

## Sheet: Lipid Species Concentrations
Name	CE(12:0)	CE(14:0)	CE(14:1)	CE(15:0)	CE(16:0)	CE(16:1)	CE(17:0)	CE(18:0)	CE(18:1)	CE(18:2)	CE(18:3)	CE(18:4)	CE(20:0)	CE(20:1)	CE(20:2)	CE(20:3)	CE(20:4)	CE(20:5)	CE(22:0)	CE(22:1)	CE(22:2)	CE(22:4)	CE(22:5)	CE(22:6)	CE(24:0)	CE(24:1)	CER(14:0)	CER(16:0)	CER(18:0)	CER(20:0)	CER(22:0)	CER(24:0)	CER(24:1)	DAG(12:0/16:0)	DAG(12:0/18:0)	DAG(12:0/18:1)	DAG(12:0/18:2)	DAG(14:0/14:0)	DAG(14:0/16:0)	DAG(14:0/16:1)	DAG(14:0/18:1)	DAG(14:0/18:2)	DAG(14:0/18:3)	DAG(14:1/16:0)	DAG(14:1/18:1)	DAG(15:0/18:1)	DAG(15:0/18:2)	DAG(16:0/16:0)	DAG(16:0/16:1)
R-00	.	.	.	.	.	.	.	.	0.0632	0.0665	.	.	.	.	.	.	.	.	.	.	.	.	.	.	.	.	0.0229	.	.	.	.	.	.	.	.	.	.	0.0375	.	.	.	.	.	.	.	.	.	0.2054	.
QC-06430	0.5776	18.5099	1.1149	5.1262	291.316	88.7819	5.0169	33.2048	547.148	1255.86	49.9877	1.6284	37.6941	5.0456	1.5551	21.997	174.569	34.2123	0.4808	2.2856	13.7346	0.6277	2.1371	17.6551	3.1407	1.0621	.	0.3201	0.1103	0.0803	0.7775	2.8886	1.4886	.	.	0.8483	0.4597	2.343	0.8886	4.4589	2.2974	0.9159	.	0.6098	0.3432	0.4257	.	1.3184	3.7796
R-01	.	0.2115	.	.	0.3901	0.5807	.	.	0.6497	0.9792	.	.	.	.	.	.	.	.	.	.	.	.	.	.	.	.	.	.	.	.	.	.	.	0.9981	0.3083	2.1444	1.7901	7.2787	1.7785	17.2301	6.3248	2.8197	.	1.8406	0.7218	1.0677	0.5202	0.6961	12.3188
R-02	.	.	.	.	.	0.8732	.	.	.	0.4132	.	.	.	.	.	.	.	.	.	.	.	.	.	.	.	.	.	.	.	.	.	.	.	1.54	.	5.3073	2.1012	8.6144	3.7275	42.0683	17.3854	4.3952	.	3.678	1.7317	0.8829	0.4145	1.6056	31.2488
R-03	.	.	.	.	.	0.3691	.	.	0.3017	0.2043	.	.	.	.	.	.	.	.	.	.	.	.	.	.	.	.	.	.	.	.	.	.	.	0.6771	.	2.0955	1.4264	5.7935	1.5578	16.0227	6.319	2.4919	0.1743	1.817	0.7903	1.1951	0.4255	0.6898	11.268
R-04	.	.	.	.	.	0.5629	.	.	0.3803	.	.	.	.	.	.	.	.	.	.	.	.	.	.	.	.	.	.	.	.	.	.	.	.	1.5816	.	2.3233	2.0149	12.3314	2.7054	20.42	6.4167	3.694	.	2.1367	0.78	1.04	0.57	1.0727	14.25
R-05	.	0.3804	.	.	0.208	0.7263	.	.	0.418	.	.	.	.	.	.	.	.	.	.	.	.	.	.	.	.	.	.	.	.	.	.	.	.	1.0066	0.269	2.1695	1.0593	8.3479	2.1174	14.7179	5.5417	1.7223	.	1.6821	0.7099	0.8609	0.3865	0.794	10.4954
R-06	.	.	.	.	.	0.3429	.	.	0.2487	0.1773	.	.	.	.	.	.	.	.	.	.	.	.	.	.	.	.	.	.	.	.	.	.	.	0.9474	.	1.7139	1.3835	7.1252	1.9401	15.2026	4.9709	2.5192	0.2293	1.3825	0.7094	0.8854	0.4016	0.9625	11.6867
R-07	.	.	.	.	.	0.6884	.	.	.	.	.	.	.	.	.	.	.	.	.	.	.	.	.	.	.	.	.	.	.	.	.	.	.	2.0933	.	4.6222	2.229	12.4115	5.3308	39.8222	16	4.8794	.	3.4039	1.7516	1.0719	.	2.3053	30.468
R-08	.	.	.	.	.	0.8252	.	.	0.4753	0.3043	.	.	.	.	.	.	.	.	.	.	.	.	.	.	.	.	.	.	.	.	.	.	.	1.7975	.	5.9009	2.1314	12.7157	4.4076	53.4701	19.6103	4.508	.	4.8068	2.1402	1.1761	0.3439	1.8746	39.2684
R-09	.	.	.	.	.	0.3471	.	.	0.2378	0.1821	.	.	.	.	.	.	.	.	.	.	.	.	.	.	.	.	.	.	.	.	.	.	.	0.9781	.	1.6344	1.1233	8.725	1.9156	14.486	4.6652	1.8472	.	1.6373	0.6222	0.7971	0.4231	0.8703	11.1369
R-10	.	.	.	.	.	0.6483	.	.	.	.	.	.	.	.	.	.	.	.	.	.	.	.	.	.	.	.	.	.	.	.	.	.	.	1.845	.	4.0462	2.4209	13.313	5.4243	35.6486	13.6971	3.9163	.	3.1723	1.6231	0.763	.	2.4188	28.4162
QC-06431	0.6061	19.3528	1.1018	5.445	296.962	86.643	5.1673	33.8256	551.535	1243.79	50.2282	1.6359	38.2574	5.179	1.5412	22.7937	176.707	33.5533	0.5271	2.0965	13.1716	0.5853	2.1176	17.6475	3.024	1.0747	.	0.2867	.	.	0.7687	2.762	1.6273	0.3492	.	0.8354	0.4777	2.1786	0.925	4.9416	2.5628	0.8773	.	0.669	0.5113	0.4071	.	1.3696	4.0035
R-11	.	0.38	.	.	.	0.5138	.	.	0.4763	0.4465	.	.	.	.	.	.	.	.	.	.	.	.	.	.	.	.	.	.	.	.	.	.	.	1.1259	.	2.3133	1.7853	7.4623	2.0901	16.2567	6.4867	2.7164	.	1.9533	0.6767	1.1133	0.6042	0.9064	11.61
R-12	.	.	.	.	.	0.8418	.	.	.	0.4688	.	.	.	.	.	.	.	.	.	.	.	.	.	.	.	.	.	.	.	.	.	.	.	1.7777	.	6.1097	2.4066	13.8201	5.2147	52.1841	20.2549	5.4164	.	4.6584	2.4071	1.1044	.	2.2123	40.3611
R-13	.	.	.	.	.	0.7708	.	.	0.5632	.	.	.	.	.	.	.	.	.	.	.	.	.	.	.	.	.	.	.	.	.	.	.	.	1.6053	.	5.5432	2.0359	9.0907	4.1767	39.9716	17.3964	4.7904	.	3.2521	1.5953	1.3586	0.3305	1.9203	31.9716
R-14	.	0.3158	.	.	.	0.4292	.	.	0.3106	0.1768	.	.	.	.	.	.	.	.	.	.	.	.	.	.	.	.	.	.	.	.	.	.	.	0.956	.	1.7394	1.2996	8.656	2.0708	12.5659	4.3707	2.1812	.	1.7505	0.6077	1.0732	.	0.734	9.915
R-15	.	.	.	.	.	0.5673	.	.	0.391	.	.	.	.	.	.	.	.	.	.	.	.	.	.	.	.	.	.	.	.	.	.	.	.	1.3091	.	2.8	1.7872	9.8591	3.7818	26.8565	9.2652	4.2043	.	2.5174	0.8826	0.7652	.	1.3977	20.313
R-16	.	.	.	.	.	0.8153	.	.	0.6196	.	.	.	.	.	.	.	.	.	.	.	.	.	.	.	.	.	.	.	.	.	.	.	.	1.2469	0.5264	4.8652	2.9184	8.3344	3.1412	41.8288	17.3879	5.408	.	3.8864	1.6582	1.163	.	1.4175	32.657
R-17	.	0.1783	.	.	.	0.3432	.	.	0.3273	0.1728	.	.	.	.	.	.	.	.	.	.	.	.	.	.	.	.	.	.	.	.	.	.	.	1.1437	.	1.9524	1.4968	9.1078	2.5125	14.3254	4.9338	2.4419	.	1.8984	0.6122	0.8283	0.5871	0.8656	10.8502
R-18	.	.	.	.	.	0.7572	.	.	0.4851	.	.	.	.	.	.	.	.	.	.	.	.	.	.	.	.	.	.	.	.	.	.	.	.	1.4829	0.4142	4.3137	2.249	10.3181	2.9704	40.7007	15.9216	4.565	.	3.6654	1.7516	1.0248	.	1.5174	31.8065
R-19	.	.	.	.	.	0.66	.	.	0.5744	.	.	.	.	.	.	.	.	.	.	.	.	.	.	.	.	.	.	.	.	.	.	.	.	1.7239	.	5.0211	2.3368	10.5926	4.1866	44.722	17.3854	5.5895	.	4.0715	1.8602	1.1902	.	1.701	34.9594
R-20	0.3851	12.9729	0.7314	3.489	197.253	56.2897	3.4073	22.5471	356.792	829.452	33.5784	1.1136	21.5757	3.5975	1.1251	15.6242	119.325	23.1223	0.2713	1.2193	8.1136	0.5348	1.4547	13.6077	1.7212	0.6052	.	0.222	.	.	0.5	1.6219	0.8289	0.6788	.	1.4089	0.8173	5.297	1.5758	9.6943	4.0408	1.7588	.	1.0471	0.4968	0.5936	.	1.2576	7.5796
QC-06432	0.6815	19.5864	1.1578	4.9708	301.671	89.3568	5.5211	35.0492	559.94	1248.26	50.8221	1.8065	39.6386	5.3788	1.4341	23.0417	180.98	34.8649	0.519	2.3567	14.1408	0.6865	2.1073	18.4133	3.1263	1.1235	.	0.282	0.1001	0.1026	0.8002	2.8171	1.3731	0.3723	.	0.6887	0.4722	2.1755	0.8658	4.1835	2.2015	0.9163	.	0.6142	0.3831	0.4	0.2898	1.4276	3.2421
[truncated: 785 more columns]

## Sheet: Lipid Species Composition
Name	CE(12:0)	CE(14:0)	CE(14:1)	CE(15:0)	CE(16:0)	CE(16:1)	CE(17:0)	CE(18:0)	CE(18:1)	CE(18:2)	CE(18:3)	CE(18:4)	CE(20:0)	CE(20:1)	CE(20:2)	CE(20:3)	CE(20:4)	CE(20:5)	CE(22:0)	CE(22:1)	CE(22:2)	CE(22:4)	CE(22:5)	CE(22:6)	CE(24:0)	CE(24:1)	CER(14:0)	CER(16:0)	CER(18:0)	CER(20:0)	CER(22:0)	CER(24:0)	CER(24:1)	DAG(12:0/16:0)	DAG(12:0/18:0)	DAG(12:0/18:1)	DAG(12:0/18:2)	DAG(14:0/14:0)	DAG(14:0/16:0)	DAG(14:0/16:1)	DAG(14:0/18:1)	DAG(14:0/18:2)	DAG(14:0/18:3)	DAG(14:1/16:0)	DAG(14:1/18:1)	DAG(15:0/18:1)	DAG(15:0/18:2)	DAG(16:0/16:0)	DAG(16:0/16:1)
R-00	.	.	.	.	.	.	.	.	48.7196	51.2804	.	.	.	.	.	.	.	.	.	.	.	.	.	.	.	.	100	.	.	.	.	.	.	.	.	.	.	6.0935	.	.	.	.	.	.	.	.	.	33.3644	.
QC-06430	0.0221	0.708	0.0426	0.1961	11.1425	3.3958	0.1919	1.27	20.9277	48.0349	1.912	0.0623	1.4418	0.193	0.0595	0.8414	6.6771	1.3086	0.0184	0.0874	0.5253	0.024	0.0817	0.6753	0.1201	0.0406	.	5.6508	1.9462	1.4178	13.7233	50.9872	26.2748	.	.	1.0186	0.552	2.8134	1.067	5.354	2.7585	1.0998	.	0.7322	0.4121	0.5111	.	1.5831	4.5384
R-01	.	7.5227	.	.	13.8781	20.6566	.	.	23.1098	34.8329	.	.	.	.	.	.	.	.	.	.	.	.	.	.	.	.	.	.	.	.	.	.	.	1.0506	0.3245	2.257	1.8841	7.6609	1.8719	18.1348	6.6569	2.9678	.	1.9373	0.7597	1.1237	0.5475	0.7327	12.9657
R-02	.	.	.	.	.	67.878	.	.	.	32.122	.	.	.	.	.	.	.	.	.	.	.	.	.	.	.	.	.	.	.	.	.	.	.	0.741	.	2.5538	1.0111	4.1451	1.7936	20.2425	8.3655	2.1149	.	1.7698	0.8333	0.4248	0.1994	0.7726	15.0363
R-03	.	.	.	.	.	42.1806	.	.	34.4753	23.3441	.	.	.	.	.	.	.	.	.	.	.	.	.	.	.	.	.	.	.	.	.	.	.	0.7668	.	2.3733	1.6154	6.5613	1.7643	18.1464	7.1566	2.8222	0.1974	2.0578	0.895	1.3535	0.4819	0.7812	12.7615
R-04	.	.	.	.	.	59.6775	.	.	40.3225	.	.	.	.	.	.	.	.	.	.	.	.	.	.	.	.	.	.	.	.	.	.	.	.	1.3765	.	2.0221	1.7536	10.7325	2.3546	17.7723	5.5847	3.215	.	1.8596	0.6789	0.9052	0.4961	0.9336	12.4023
R-05	.	21.9539	.	.	12.0061	41.9154	.	.	24.1246	.	.	.	.	.	.	.	.	.	.	.	.	.	.	.	.	.	.	.	.	.	.	.	.	1.21	0.3234	2.6079	1.2734	10.0346	2.5452	17.6916	6.6614	2.0703	.	2.022	0.8534	1.0349	0.4646	0.9544	12.6159
R-06	.	.	.	.	.	44.595	.	.	32.3502	23.0548	.	.	.	.	.	.	.	.	.	.	.	.	.	.	.	.	.	.	.	.	.	.	.	1.1272	.	2.0391	1.646	8.4771	2.3082	18.0871	5.914	2.9972	0.2728	1.6448	0.844	1.0534	0.4778	1.1451	13.9041
R-07	.	.	.	.	.	100	.	.	.	.	.	.	.	.	.	.	.	.	.	.	.	.	.	.	.	.	.	.	.	.	.	.	.	0.9982	.	2.2042	1.0629	5.9187	2.5421	18.9899	7.6299	2.3268	.	1.6232	0.8353	0.5112	.	1.0993	14.5292
R-08	.	.	.	.	.	51.4189	.	.	29.6169	18.9642	.	.	.	.	.	.	.	.	.	.	.	.	.	.	.	.	.	.	.	.	.	.	.	0.6938	.	2.2778	0.8227	4.9084	1.7014	20.6402	7.5698	1.7402	.	1.8555	0.8261	0.454	0.1327	0.7236	15.1582
R-09	.	.	.	.	.	45.2459	.	.	31.0078	23.7463	.	.	.	.	.	.	.	.	.	.	.	.	.	.	.	.	.	.	.	.	.	.	.	1.2313	.	2.0575	1.414	10.9834	2.4115	18.2356	5.8728	2.3253	.	2.0611	0.7833	1.0035	0.5326	1.0956	14.0196
R-10	.	.	.	.	.	100	.	.	.	.	.	.	.	.	.	.	.	.	.	.	.	.	.	.	.	.	.	.	.	.	.	.	.	0.9642	.	2.1145	1.2651	6.9572	2.8347	18.6295	7.1579	2.0466	.	1.6578	0.8482	0.3987	.	1.264	14.8499
QC-06431	0.0232	0.7402	0.0421	0.2083	11.358	3.3139	0.1976	1.2937	21.0947	47.5716	1.9211	0.0626	1.4632	0.1981	0.0589	0.8718	6.7585	1.2833	0.0202	0.0802	0.5038	0.0224	0.081	0.675	0.1157	0.0411	.	5.2661	.	.	14.1176	50.7283	29.888	0.3934	.	0.9412	0.5382	2.4545	1.0421	5.5674	2.8874	0.9884	.	0.7537	0.5761	0.4586	.	1.5431	4.5105
R-11	.	20.9199	.	.	.	28.2824	.	.	26.2192	24.5784	.	.	.	.	.	.	.	.	.	.	.	.	.	.	.	.	.	.	.	.	.	.	.	1.1846	.	2.4339	1.8783	7.8511	2.199	17.1038	6.8247	2.8579	.	2.0551	0.7119	1.1714	0.6357	0.9536	12.215
R-12	.	.	.	.	.	64.2317	.	.	.	35.7683	.	.	.	.	.	.	.	.	.	.	.	.	.	.	.	.	.	.	.	.	.	.	.	0.6802	.	2.3377	0.9208	5.2879	1.9952	19.9668	7.75	2.0724	.	1.7824	0.921	0.4226	.	0.8465	15.4431
R-13	.	.	.	.	.	57.7803	.	.	42.2197	.	.	.	.	.	.	.	.	.	.	.	.	.	.	.	.	.	.	.	.	.	.	.	.	0.7548	.	2.6063	0.9573	4.2743	1.9638	18.794	8.1795	2.2524	.	1.5291	0.7501	0.6388	0.1554	0.9029	15.0326
R-14	.	25.6247	.	.	.	34.8259	.	.	25.2008	14.3486	.	.	.	.	.	.	.	.	.	.	.	.	.	.	.	.	.	.	.	.	.	.	.	1.265	.	2.3015	1.7196	11.4535	2.7401	16.6269	5.7833	2.8862	.	2.3163	0.8041	1.42	.	0.9713	13.1193
R-15	.	.	.	.	.	59.2022	.	.	40.7978	.	.	.	.	.	.	.	.	.	.	.	.	.	.	.	.	.	.	.	.	.	.	.	.	0.9351	.	2.0001	1.2766	7.0425	2.7014	19.184	6.6183	3.0032	.	1.7982	0.6305	0.5466	.	0.9984	14.5099
R-16	.	.	.	.	.	56.8214	.	.	43.1786	.	.	.	.	.	.	.	.	.	.	.	.	.	.	.	.	.	.	.	.	.	.	.	.	0.5653	0.2386	2.2055	1.323	3.7783	1.424	18.9625	7.8825	2.4516	.	1.7618	0.7517	0.5272	.	0.6426	14.8046
R-17	.	17.4508	.	.	.	33.5947	.	.	32.0384	16.9161	.	.	.	.	.	.	.	.	.	.	.	.	.	.	.	.	.	.	.	.	.	.	.	1.3373	.	2.2827	1.75	10.6488	2.9376	16.7491	5.7685	2.8551	.	2.2196	0.7158	0.9684	0.6864	1.0121	12.6859
R-18	.	.	.	.	.	60.953	.	.	39.047	.	.	.	.	.	.	.	.	.	.	.	.	.	.	.	.	.	.	.	.	.	.	.	.	0.7131	0.1992	2.0743	1.0814	4.9616	1.4284	19.5714	7.6561	2.1952	.	1.7625	0.8423	0.4928	.	0.7297	15.2946
R-19	.	.	.	.	.	53.4695	.	.	46.5305	.	.	.	.	.	.	.	.	.	.	.	.	.	.	.	.	.	.	.	.	.	.	.	.	0.7607	.	2.2157	1.0312	4.6743	1.8475	19.7351	7.6719	2.4665	.	1.7967	0.8209	0.5252	.	0.7506	15.427
R-20	0.0223	0.7499	0.0423	0.2017	11.4025	3.2539	0.197	1.3034	20.6249	47.9477	1.9411	0.0644	1.2472	0.208	0.065	0.9032	6.8978	1.3366	0.0157	0.0705	0.469	0.0309	0.0841	0.7866	0.0995	0.035	.	6.9959	.	.	15.7584	51.1209	26.1247	0.8142	.	1.69	0.9804	6.3536	1.8901	11.628	4.8468	2.1097	.	1.256	0.5959	0.712	.	1.5084	9.0916
QC-06432	0.0258	0.74	0.0437	0.1878	11.3983	3.3762	0.2086	1.3243	21.1566	47.1641	1.9203	0.0683	1.4977	0.2032	0.0542	0.8706	6.8381	1.3173	0.0196	0.089	0.5343	0.0259	0.0796	0.6957	0.1181	0.0424	.	5.1507	1.8278	1.8735	14.6161	51.4528	25.0792	0.4777	.	0.8837	0.6059	2.7913	1.1109	5.3676	2.8246	1.1757	.	0.788	0.4915	0.5132	0.3718	1.8317	4.1598
[truncated: 785 more columns]

## Sheet: Lipid Class Concentration
Name	CE	CER	DAG	DCER	FFA	HCER	LCER	LPC	LPE	PC	PE	SM	TAG		14d
R-00	0.1297	0.0229	0.6158	0.3093	79.318	.	.	.	.	.	.	1.2898	0.9499			CE	CER	DAG	DCER	FFA	HCER	LCER	LPC	LPE	PC	PE	SM	TAG
QC-06430	2614.47	5.6653	83.2816	.	2948.46	3.4731	2.4543	419.543	9.2372	2509.85	330.683	387.385	2984.24		NF	0.967	#DIV/0!	134.025	0.2992	9324.49	0.0878	#DIV/0!	30.8297	64.1023	975.714	2750.65	39.2672	5863.23
R-01	2.8112	.	95.0109	.	7140.47	.	.	26.238	42.1062	267.731	799.962	8.3532	10352.3		HSD	1.1593	#DIV/0!	272.669	#DIV/0!	7066.08	#DIV/0!	#DIV/0!	19.4104	33.9174	1262.24	3300.5	53.4782	14209.6
R-02	1.2864	.	207.822	.	7405.18	.	.	72.9188	56.8388	372.886	871.154	13.6076	19901		t-test	0.201084		2.227e-08		2.43564e-06			0.001965	4.508e-06	0.00036712	0.0107804	0.0004816	1.55922e-06
R-03	0.875	.	88.2969	.	6596.95	.	.	37.1122	30.8223	246.278	780.443	7.8646	8628.42		%FC	19.8854	#DIV/0!	103.447	#DIV/0!	-24.2202	#DIV/0!	#DIV/0!	-37.0398	-47.0887	29.3661	19.9897	36.1906	142.351
R-04	0.9432	.	114.898	.	7293.08	.	.	72.9346	51.209	563.881	1153.61	18.9166	10709.8
R-05	1.7327	.	83.1914	.	7134.18	.	.	58.5728	47.476	323.196	874.933	10.0437	8126.23
R-06	0.7689	.	84.0523	.	7169.81	.	.	32.6037	39.484	336.32	846.174	9.2099	9540.34
R-07	0.6884	.	209.702	.	7667.79	.	.	72.4341	47.9359	448.846	1029.36	17.6312	20743.5
R-08	1.6048	.	259.058	.	7323.56	.	.	70.9834	43.9749	512.093	1092.76	20.0873	17391.4
R-09	0.7671	.	79.4382	.	7009.3	.	.	33.5057	26.9792	304.261	783.406	8.6126	7866.75
R-10	0.6483	.	191.355	.	7614.94	.	.	70.6057	52.6844	455.497	926.947	18.0567	21694.6
QC-06431	2614.57	5.4448	88.7599	0.4361	2853.85	3.5198	2.1108	427.669	8.867	2557.72	343.817	394.867	2677.87
R-11	1.8165	.	95.047	.	7977.35	.	.	28.2432	40.797	353.738	953.775	13.0161	9872.14
R-12	1.3106	.	261.354	.	8718.11	.	.	75.6057	52.1249	515.859	1046.67	19.9856	20477.5
R-13	1.3341	.	212.682	.	7184.9	.	.	60.1825	45.6503	321.314	882.841	14.7485	19387.1
R-14	1.2323	.	75.5755	.	7665.99	.	.	49.4143	48.4303	343.169	867.582	9.822	7941.44
R-15	0.9583	.	139.994	.	7308.86	.	.	55.4308	36.3615	406.9	901.794	15.6739	16608.2
R-16	1.4349	.	220.587	.	7832.19	.	.	54.8666	39.5427	551.564	1061.75	19.629	20450.2
R-17	1.0217	.	85.5293	.	7466.65	.	.	28.2945	34.7242	285.601	787.28	9.0402	8657.1
R-18	1.2423	.	207.959	.	7899.56	.	.	38.3451	49.8168	490.317	1119.43	22.5677	19789.9
R-19	1.2344	.	226.612	.	7556.08	.	.	58.9938	40.7837	431.162	962.18	17.1234	21106.8
R-20	1729.91	3.1727	83.3697	.	5533.82	1.8125	1.2881	190.595	21.8634	1734	598.349	261.258	5577.46
QC-06432	2646.64	5.4751	77.9391	.	2920.02	3.4902	2.4838	423.712	9.086	2499.87	333.752	388.164	2718.44
7d
	CE	CER	DAG	DCER	FFA	HCER	LCER	LPC	LPE	PC	PE	SM	TAG
NF	1.2126	#DIV/0!	141.282	0.2992	6845.79	0.0878	#DIV/0!	54.7909	43.9511	383.099	915.875	13.2383	13495.4
HSD	1.28723	#DIV/0!	169.482	#DIV/0!	7734.41	#DIV/0!	#DIV/0!	49.9307	43.1368	411.069	953.7	15.734	16032.3
t-test	0.343239		0.539411		0.333517			0.578051	0.482603	0.276504	0.971633	0.300616	0.583032
%FC	6.15482	#DIV/0!	19.96	#DIV/0!	12.9805	#DIV/0!	#DIV/0!	-8.87041	-1.85262	7.30106	4.12999	18.8521	18.7977
FC	1.06155		1.1996		1.1298			0.911296	0.981474	1.07301	1.0413	1.18852	1.18798
SD NF	0.679902		67.992		307.901			19.9133	9.46992	106.985	132.776	4.97074	5710.13
% SD NF	56.0698		48.1249		4.49766			36.3441	21.5465	27.9261	14.4972	37.5481	42.3116
SD HSD	0.247791		70.6571		454.803			15.7084	6.12733	92.9494	106.468	4.60974	5573.8
% SD HSD	19.2499		41.6899		5.88026			31.4603	14.2044	22.6116	11.1637	29.2979	34.7661

## Sheet: Lipid Class Composition
Name	CE	CER	DAG	DCER	FFA	HCER	LCER	LPC	LPE	PC	PE	SM	TAG
R-00	0.1569	0.0277	0.7452	0.3743	95.9857	.	.	.	.	.	.	1.5608	1.1495
QC-06430	21.258	0.0461	0.6772	.	23.9737	0.0282	0.02	3.4113	0.0751	20.4073	2.6888	3.1498	24.2646
R-01	0.015	.	0.5071	.	38.113	.	.	0.14	0.2247	1.429	4.2699	0.0446	55.2565
R-02	0.0045	.	0.719	.	25.6211	.	.	0.2523	0.1967	1.2901	3.0141	0.0471	68.8552
R-03	0.0053	.	0.5378	.	40.1835	.	.	0.2261	0.1877	1.5001	4.7539	0.0479	52.5576
R-04	0.0047	.	0.5751	.	36.5032	.	.	0.3651	0.2563	2.8223	5.774	0.0947	53.6047
R-05	0.0104	.	0.4994	.	42.8234	.	.	0.3516	0.285	1.94	5.2518	0.0603	48.7782
R-06	0.0043	.	0.4654	.	39.7026	.	.	0.1805	0.2186	1.8624	4.6857	0.051	52.8294
R-07	0.0023	.	0.6935	.	25.3582	.	.	0.2395	0.1585	1.4844	3.4042	0.0583	68.601
R-08	0.006	.	0.9697	.	27.4131	.	.	0.2657	0.1646	1.9168	4.0903	0.0752	65.0986
R-09	0.0048	.	0.493	.	43.5009	.	.	0.2079	0.1674	1.8883	4.8619	0.0535	48.8223
R-10	0.0021	.	0.6168	.	24.5442	.	.	0.2276	0.1698	1.4681	2.9877	0.0582	69.9255
QC-06431	21.8254	0.0455	0.7409	0.0036	23.8228	0.0294	0.0176	3.57	0.074	21.3508	2.87	3.2962	22.3538
R-11	0.0094	.	0.4916	.	41.2566	.	.	0.1461	0.211	1.8294	4.9327	0.0673	51.0559
R-12	0.0042	.	0.8385	.	27.9709	.	.	0.2426	0.1672	1.6551	3.3581	0.0641	65.6993
R-13	0.0047	.	0.7566	.	25.5593	.	.	0.2141	0.1624	1.143	3.1406	0.0525	68.9668
R-14	0.0072	.	0.4445	.	45.087	.	.	0.2906	0.2848	2.0183	5.1026	0.0578	46.7071
R-15	0.0038	.	0.5496	.	28.6912	.	.	0.2176	0.1427	1.5973	3.54	0.0615	65.1963
R-16	0.0047	.	0.7297	.	25.9071	.	.	0.1815	0.1308	1.8245	3.512	0.0649	67.6448
R-17	0.0059	.	0.4928	.	43.0225	.	.	0.163	0.2001	1.6456	4.5363	0.0521	49.8818
R-18	0.0042	.	0.7021	.	26.6704	.	.	0.1295	0.1682	1.6554	3.7794	0.0762	66.8146
R-19	0.0041	.	0.7454	.	24.8547	.	.	0.1941	0.1342	1.4182	3.165	0.0563	69.4281
R-20	10.9927	0.0202	0.5298	.	35.1646	0.0115	0.0082	1.2111	0.1389	11.0187	3.8022	1.6602	35.442
QC-06432	22.002	0.0455	0.6479	.	24.2747	0.029	0.0206	3.5224	0.0755	20.7819	2.7745	3.2269	22.5989

## Sheet: Fatty Acid Concentration
Name	CE(FA12:0)	CE(FA14:0)	CE(FA14:1)	CE(FA15:0)	CE(FA16:0)	CE(FA16:1)	CE(FA17:0)	CE(FA18:0)	CE(FA18:1)	CE(FA18:2)	CE(FA18:3)	CE(FA18:4)	CE(FA20:0)	CE(FA20:1)	CE(FA20:2)	CE(FA20:3)	CE(FA20:4)	CE(FA20:5)	CE(FA22:0)	CE(FA22:1)	CE(FA22:2)	CE(FA22:4)	CE(FA22:5)	CE(FA22:6)	CE(FA24:0)	CE(FA24:1)	CER(FA14:0)	CER(FA16:0)	CER(FA18:0)	CER(FA20:0)	CER(FA22:0)	CER(FA24:0)	CER(FA24:1)	DAG(FA12:0)	DAG(FA14:0)	DAG(FA14:1)	DAG(FA15:0)	DAG(FA16:0)	DAG(FA16:1)	DAG(FA18:0)	DAG(FA18:1)	DAG(FA18:2)	DAG(FA18:3)	DAG(FA20:0)	DAG(FA20:3)	DAG(FA20:4)	DAG(FA20:5)	DAG(FA22:6)	DCER(FA24:1)
R-00	.	.	.	.	.	.	.	.	0.0632	0.0665	.	.	.	.	.	.	.	.	.	.	.	.	.	.	.	.	0.0229	.	.	.	.	.	.	.	0.075	.	.	0.7837	.	0.3728	.	.	.	.	.	.	.	.	0.1241
QC-06430	0.5776	18.5099	1.1149	5.1262	291.316	88.7819	5.0169	33.2048	547.148	1255.86	49.9877	1.6284	37.6941	5.0456	1.5551	21.997	174.569	34.2123	0.4808	2.2856	13.7346	0.6277	2.1371	17.6551	3.1407	1.0621	.	0.3201	0.1103	0.0803	0.7775	2.8886	1.4886	1.308	13.2468	0.953	0.4257	20.2391	17.7031	4.0683	30.4934	13.4249	.	62.7549	.	1.4062	0.1986	0.3412	.
R-01	.	0.2115	.	.	0.3901	0.5807	.	.	0.6497	0.9792	.	.	.	.	.	.	.	.	.	.	.	.	.	.	.	.	.	.	.	.	.	.	.	5.2409	42.7105	2.5624	1.5878	27.9101	57.0862	3.7694	30.4061	18.1525	0.5957	.	.	.	.	.	.
R-02	.	.	.	.	.	0.8732	.	.	.	0.4132	.	.	.	.	.	.	.	.	.	.	.	.	.	.	.	.	.	.	.	.	.	.	.	8.9485	84.8051	5.4098	1.2974	66.7875	138.689	5.0649	77.3332	27.3088	.	.	.	.	.	.	.
R-03	.	.	.	.	.	0.3691	.	.	0.3017	0.2043	.	.	.	.	.	.	.	.	.	.	.	.	.	.	.	.	.	.	.	.	.	.	.	4.199	38.1526	2.6073	1.6207	26.2131	53.7057	3.4681	30.4943	15.3089	0.824	.	.	.	.	.	.
R-04	.	.	.	.	.	0.5629	.	.	0.3803	.	.	.	.	.	.	.	.	.	.	.	.	.	.	.	.	.	.	.	.	.	.	.	.	5.9198	57.8987	2.9167	1.61	33.7871	67.7047	3.4598	32.9563	23.5423	.	.	.	.	.	.	.
R-05	.	0.3804	.	.	0.208	0.7263	.	.	0.418	.	.	.	.	.	.	.	.	.	.	.	.	.	.	.	.	.	.	.	.	.	.	.	.	4.5045	40.7951	2.3921	1.2475	25.0958	49.7056	3.3118	26.8936	11.7407	0.6961	.	.	.	.	.	.
R-06	.	.	.	.	.	0.3429	.	.	0.2487	0.1773	.	.	.	.	.	.	.	.	.	.	.	.	.	.	.	.	.	.	.	.	.	.	.	4.0449	39.1125	2.0919	1.287	26.2304	51.5108	2.5647	24.7629	15.6361	0.8634	.	.	.	.	.	.
R-07	.	.	.	.	.	0.6884	.	.	.	.	.	.	.	.	.	.	.	.	.	.	.	.	.	.	.	.	.	.	.	.	.	.	.	8.9445	90.8555	5.1556	1.0719	69.1091	131.554	5.5329	74.7037	32.4763	.	.	.	.	.	.	.
R-08	.	.	.	.	.	0.8252	.	.	0.4753	0.3043	.	.	.	.	.	.	.	.	.	.	.	.	.	.	.	.	.	.	.	.	.	.	.	9.8297	107.427	6.947	1.5199	80.644	180.689	7.059	93.9066	30.0929	.	.	.	.	.	.	.
R-09	.	.	.	.	.	0.3471	.	.	0.2378	0.1821	.	.	.	.	.	.	.	.	.	.	.	.	.	.	.	.	.	.	.	.	.	.	.	3.7358	40.3641	2.2595	1.2202	24.6735	48.9488	3.0609	23.0354	11.5783	.	.	.	.	.	.	.
R-10	.	.	.	.	.	0.6483	.	.	.	.	.	.	.	.	.	.	.	.	.	.	.	.	.	.	.	.	.	.	.	.	.	.	.	8.3122	85.3124	4.7954	0.763	63.5827	121.489	4.7474	64.8353	28.8732	.	.	.	.	.	.	.
QC-06431	0.6061	19.3528	1.1018	5.445	296.962	86.643	5.1673	33.8256	551.535	1243.79	50.2282	1.6359	38.2574	5.179	1.5412	22.7937	176.707	33.5533	0.5271	2.0965	13.1716	0.5853	2.1176	17.6475	3.024	1.0747	.	0.2867	.	.	0.7687	2.762	1.6273	1.6623	13.6639	1.1803	0.4071	22.5615	19.0432	4.0756	33.8675	12.1186	0.6576	66.8082	0.1821	1.1576	.	0.1343	0.4361
R-11	.	0.38	.	.	.	0.5138	.	.	0.4763	0.4465	.	.	.	.	.	.	.	.	.	.	.	.	.	.	.	.	.	.	.	.	.	.	.	5.2246	42.4743	2.63	1.7176	28.5947	55.5984	3.5988	31.3915	18.8641	.	.	.	.	.	.	.
R-12	.	.	.	.	.	0.8418	.	.	.	0.4688	.	.	.	.	.	.	.	.	.	.	.	.	.	.	.	.	.	.	.	.	.	.	.	10.294	110.71	7.0655	1.1044	82.6052	175.541	5.8148	94.0476	35.5258	.	.	.	.	.	.	.
R-13	.	.	.	.	.	0.7708	.	.	0.5632	.	.	.	.	.	.	.	.	.	.	.	.	.	.	.	.	.	.	.	.	.	.	.	.	9.1845	84.5165	4.8473	1.6891	70.2128	135.47	5.8886	82.8733	30.6826	.	.	.	.	.	.	.
R-14	.	0.3158	.	.	.	0.4292	.	.	0.3106	0.1768	.	.	.	.	.	.	.	.	.	.	.	.	.	.	.	.	.	.	.	.	.	.	.	3.995	38.5007	2.3582	1.0732	23.2985	43.6355	2.7092	22.6923	12.4441	0.4444	.	.	.	.	.	.
R-15	.	.	.	.	.	0.5673	.	.	0.391	.	.	.	.	.	.	.	.	.	.	.	.	.	.	.	.	.	.	.	.	.	.	.	.	5.8963	63.826	3.4	0.7652	44.6043	88.2916	4.0751	44.5662	24.5641	.	.	.	.	.	.	.
R-16	.	.	.	.	.	0.8153	.	.	0.6196	.	.	.	.	.	.	.	.	.	.	.	.	.	.	.	.	.	.	.	.	.	.	.	.	9.5568	84.4347	5.5445	1.163	68.8983	146.672	7.033	81.5521	36.32	.	.	.	.	.	.	.
R-17	.	0.1783	.	.	.	0.3432	.	.	0.3273	0.1728	.	.	.	.	.	.	.	.	.	.	.	.	.	.	.	.	.	.	.	.	.	.	.	4.5929	42.4292	2.5106	1.4154	26.1473	49.1177	2.718	25.6621	15.7452	0.7203	.	.	.	.	.	.
R-18	.	.	.	.	.	0.7572	.	.	0.4851	.	.	.	.	.	.	.	.	.	.	.	.	.	.	.	.	.	.	.	.	.	.	.	.	8.4598	84.7938	5.417	1.0248	65.7847	138.767	5.7433	74.3875	31.5413	.	.	.	.	.	.	.
R-19	.	.	.	.	.	0.66	.	.	0.5744	.	.	.	.	.	.	.	.	.	.	.	.	.	.	.	.	.	.	.	.	.	.	.	.	9.0819	93.0686	5.9317	1.1902	73.0711	148.275	5.9608	82.2548	34.3895	.	.	.	.	.	.	.
R-20	0.3851	12.9729	0.7314	3.489	197.253	56.2897	3.4073	22.5471	356.792	829.452	33.5784	1.1136	21.5757	3.5975	1.1251	15.6242	119.325	23.1223	0.2713	1.2193	8.1136	0.5348	1.4547	13.6077	1.7212	0.6052	.	0.222	.	.	0.5	1.6219	0.8289	2.905	27.6636	1.5439	0.5936	23.8638	34.4764	3.1851	29.4656	13.2765	.	29.1209	.	0.6449	.	.	.
QC-06432	0.6815	19.5864	1.1578	4.9708	301.671	89.3568	5.5211	35.0492	559.94	1248.26	50.8221	1.8065	39.6386	5.3788	1.4341	23.0417	180.98	34.8649	0.519	2.3567	14.1408	0.6865	2.1073	18.4133	3.1263	1.1235	.	0.282	0.1001	0.1026	0.8002	2.8171	1.3731	1.5333	12.5181	0.9972	0.6898	20.2108	16.4501	3.462	30.5486	12.7685	0.7632	54.3857	.	0.9526	0.1967	0.4017	.
[truncated: 140 more columns]

## Sheet: Fatty Acid Composition
Name	CE(FA12:0)	CE(FA14:0)	CE(FA14:1)	CE(FA15:0)	CE(FA16:0)	CE(FA16:1)	CE(FA17:0)	CE(FA18:0)	CE(FA18:1)	CE(FA18:2)	CE(FA18:3)	CE(FA18:4)	CE(FA20:0)	CE(FA20:1)	CE(FA20:2)	CE(FA20:3)	CE(FA20:4)	CE(FA20:5)	CE(FA22:0)	CE(FA22:1)	CE(FA22:2)	CE(FA22:4)	CE(FA22:5)	CE(FA22:6)	CE(FA24:0)	CE(FA24:1)	CER(FA14:0)	CER(FA16:0)	CER(FA18:0)	CER(FA20:0)	CER(FA22:0)	CER(FA24:0)	CER(FA24:1)	DAG(FA12:0)	DAG(FA14:0)	DAG(FA14:1)	DAG(FA15:0)	DAG(FA16:0)	DAG(FA16:1)	DAG(FA18:0)	DAG(FA18:1)	DAG(FA18:2)	DAG(FA18:3)	DAG(FA20:0)	DAG(FA20:3)	DAG(FA20:4)	DAG(FA20:5)	DAG(FA22:6)	DCER(FA24:1)
R-00	.	.	.	.	.	.	.	.	48.7196	51.2804	.	.	.	.	.	.	.	.	.	.	.	.	.	.	.	.	100	.	.	.	.	.	.	.	6.0935	.	.	63.6355	.	30.271	.	.	.	.	.	.	.	.	40.1326
QC-06430	0.0221	0.708	0.0426	0.1961	11.1425	3.3958	0.1919	1.27	20.9277	48.0349	1.912	0.0623	1.4418	0.193	0.0595	0.8414	6.6771	1.3086	0.0184	0.0874	0.5253	0.024	0.0817	0.6753	0.1201	0.0406	.	5.6508	1.9462	1.4178	13.7233	50.9872	26.2748	0.7853	7.953	0.5722	0.2556	12.151	10.6284	2.4425	18.3074	8.06	.	37.6763	.	0.8442	0.1193	0.2049	.
R-01	.	7.5227	.	.	13.8781	20.6566	.	.	23.1098	34.8329	.	.	.	.	.	.	.	.	.	.	.	.	.	.	.	.	.	.	.	.	.	.	.	2.7581	22.4767	1.3485	0.8356	14.6879	30.0419	1.9837	16.0014	9.5528	0.3135	.	.	.	.	.	.
R-02	.	.	.	.	.	67.878	.	.	.	32.122	.	.	.	.	.	.	.	.	.	.	.	.	.	.	.	.	.	.	.	.	.	.	.	2.1529	20.4033	1.3015	0.3121	16.0684	33.3672	1.2186	18.6056	6.5702	.	.	.	.	.	.	.
R-03	.	.	.	.	.	42.1806	.	.	34.4753	23.3441	.	.	.	.	.	.	.	.	.	.	.	.	.	.	.	.	.	.	.	.	.	.	.	2.3778	21.6047	1.4764	0.9177	14.8437	30.412	1.9639	17.2681	8.669	0.4666	.	.	.	.	.	.
R-04	.	.	.	.	.	59.6775	.	.	40.3225	.	.	.	.	.	.	.	.	.	.	.	.	.	.	.	.	.	.	.	.	.	.	.	.	2.5761	25.1958	1.2692	0.7006	14.7031	29.463	1.5056	14.3416	10.2449	.	.	.	.	.	.	.
R-05	.	21.9539	.	.	12.0061	41.9154	.	.	24.1246	.	.	.	.	.	.	.	.	.	.	.	.	.	.	.	.	.	.	.	.	.	.	.	.	2.7073	24.5189	1.4377	0.7498	15.0832	29.8743	1.9905	16.1637	7.0564	0.4184	.	.	.	.	.	.
R-06	.	.	.	.	.	44.595	.	.	32.3502	23.0548	.	.	.	.	.	.	.	.	.	.	.	.	.	.	.	.	.	.	.	.	.	.	.	2.4062	23.2668	1.2444	0.7656	15.6036	30.6421	1.5257	14.7307	9.3014	0.5136	.	.	.	.	.	.
R-07	.	.	.	.	.	100	.	.	.	.	.	.	.	.	.	.	.	.	.	.	.	.	.	.	.	.	.	.	.	.	.	.	.	2.1327	21.663	1.2293	0.2556	16.4779	31.367	1.3192	17.8119	7.7435	.	.	.	.	.	.	.
R-08	.	.	.	.	.	51.4189	.	.	29.6169	18.9642	.	.	.	.	.	.	.	.	.	.	.	.	.	.	.	.	.	.	.	.	.	.	.	1.8972	20.7343	1.3408	0.2934	15.5649	34.8742	1.3624	18.1247	5.8082	.	.	.	.	.	.	.
R-09	.	.	.	.	.	45.2459	.	.	31.0078	23.7463	.	.	.	.	.	.	.	.	.	.	.	.	.	.	.	.	.	.	.	.	.	.	.	2.3514	25.406	1.4222	0.768	15.53	30.8093	1.9266	14.499	7.2876	.	.	.	.	.	.	.
R-10	.	.	.	.	.	100	.	.	.	.	.	.	.	.	.	.	.	.	.	.	.	.	.	.	.	.	.	.	.	.	.	.	.	2.1719	22.2916	1.253	0.1994	16.6138	31.7444	1.2405	16.9411	7.5444	.	.	.	.	.	.	.
QC-06431	0.0232	0.7402	0.0421	0.2083	11.358	3.3139	0.1976	1.2937	21.0947	47.5716	1.9211	0.0626	1.4632	0.1981	0.0589	0.8718	6.7585	1.2833	0.0202	0.0802	0.5038	0.0224	0.081	0.675	0.1157	0.0411	.	5.2661	.	.	14.1176	50.7283	29.888	0.9364	7.6971	0.6649	0.2293	12.7093	10.7274	2.2958	19.0781	6.8266	0.3704	37.6342	0.1026	0.6521	.	0.0756	100
R-11	.	20.9199	.	.	.	28.2824	.	.	26.2192	24.5784	.	.	.	.	.	.	.	.	.	.	.	.	.	.	.	.	.	.	.	.	.	.	.	2.7484	22.3439	1.3835	0.9035	15.0424	29.2478	1.8932	16.5137	9.9236	.	.	.	.	.	.	.
R-12	.	.	.	.	.	64.2317	.	.	.	35.7683	.	.	.	.	.	.	.	.	.	.	.	.	.	.	.	.	.	.	.	.	.	.	.	1.9694	21.1801	1.3517	0.2113	15.8033	33.5829	1.1124	17.9924	6.7965	.	.	.	.	.	.	.
R-13	.	.	.	.	.	57.7803	.	.	42.2197	.	.	.	.	.	.	.	.	.	.	.	.	.	.	.	.	.	.	.	.	.	.	.	.	2.1592	19.8692	1.1396	0.3971	16.5065	31.8479	1.3844	19.4829	7.2133	.	.	.	.	.	.	.
R-14	.	25.6247	.	.	.	34.8259	.	.	25.2008	14.3486	.	.	.	.	.	.	.	.	.	.	.	.	.	.	.	.	.	.	.	.	.	.	.	2.643	25.4717	1.5602	0.71	15.414	28.8688	1.7924	15.013	8.2329	0.294	.	.	.	.	.	.
R-15	.	.	.	.	.	59.2022	.	.	40.7978	.	.	.	.	.	.	.	.	.	.	.	.	.	.	.	.	.	.	.	.	.	.	.	.	2.1059	22.7959	1.2143	0.2733	15.9307	31.534	1.4555	15.9171	8.7732	.	.	.	.	.	.	.
R-16	.	.	.	.	.	56.8214	.	.	43.1786	.	.	.	.	.	.	.	.	.	.	.	.	.	.	.	.	.	.	.	.	.	.	.	.	2.1662	19.1386	1.2568	0.2636	15.617	33.2458	1.5941	18.4852	8.2326	.	.	.	.	.	.	.
R-17	.	17.4508	.	.	.	33.5947	.	.	32.0384	16.9161	.	.	.	.	.	.	.	.	.	.	.	.	.	.	.	.	.	.	.	.	.	.	.	2.685	24.8039	1.4677	0.8274	15.2856	28.7139	1.5889	15.0019	9.2045	0.4211	.	.	.	.	.	.
R-18	.	.	.	.	.	60.953	.	.	39.047	.	.	.	.	.	.	.	.	.	.	.	.	.	.	.	.	.	.	.	.	.	.	.	.	2.034	20.3871	1.3024	0.2464	15.8167	33.3639	1.3809	17.8851	7.5835	.	.	.	.	.	.	.
R-19	.	.	.	.	.	53.4695	.	.	46.5305	.	.	.	.	.	.	.	.	.	.	.	.	.	.	.	.	.	.	.	.	.	.	.	.	2.0038	20.5348	1.3088	0.2626	16.1225	32.7156	1.3152	18.1488	7.5878	.	.	.	.	.	.	.
R-20	0.0223	0.7499	0.0423	0.2017	11.4025	3.2539	0.197	1.3034	20.6249	47.9477	1.9411	0.0644	1.2472	0.208	0.065	0.9032	6.8978	1.3366	0.0157	0.0705	0.469	0.0309	0.0841	0.7866	0.0995	0.035	.	6.9959	.	.	15.7584	51.1209	26.1247	1.7423	16.5909	0.926	0.356	14.312	20.6768	1.9103	17.6716	7.9624	.	17.4649	.	0.3868	.	.	.
QC-06432	0.0258	0.74	0.0437	0.1878	11.3983	3.3762	0.2086	1.3243	21.1566	47.1641	1.9203	0.0683	1.4977	0.2032	0.0542	0.8706	6.8381	1.3173	0.0196	0.089	0.5343	0.0259	0.0796	0.6957	0.1181	0.0424	.	5.1507	1.8278	1.8735	14.6161	51.4528	25.0792	0.9836	8.0307	0.6397	0.4425	12.9658	10.5532	2.221	19.5977	8.1913	0.4896	34.8899	.	0.6111	0.1262	0.2577	.
[truncated: 140 more columns]
