# Supplementary material for: Fat body phospholipid state dictates hunger-driven feeding behavior
Source: eLife journal article supplement (doi:10.7554/elife.80282), 2022-10-06
Supplement: supp [file elife-80282-supp-v1.zip › elife_poa_e80282_Figure_3_source_data_2.xlsx]

## Sheet: Key-to-Lipidomics-Data
	Lipids data is provided in six different worksheets. The details of the data in each sheet is as follows:
	Sheet 1 Lipid Species Concentrations
		This sheet provides comprehensive list of various lipids from 13 different lipid classes and their absolute concentrations. The concentrations are expressed in nmol/g of plasma (µM)*
		Note: Each of your samples was added with a set of representative isotope labeled lipids for each class to obtain the absolute concentrations.
													*for tissue samples, multiply by 25 and divide by mg of sample
		The names of the 13 Lipid classes are:				Abbreviation	Lipid class												Sample	Treatment					All samples were treated on diet for 14 days
					1	CE	Cholesterol Ester												Prep Blank	Negative Control					All samples contained n=10 whole flies
					2	CER	Ceramides												QC-1	Quality Control (QC)					All samples are W1118
					3	DAG	Diacylglycerol												RE-01	Normal Fed 14 days (NF 14d)
					4	DCER	Dihydroceramides												RE-02	NF 14d
					5	FFA	Free fatty Acids												RE-03	NF 14d
					6	HCER	Hexosylceramides												RE-04	NF 14d
					7	LCER	Lactosylceramide												RE-05	NF 14d
					8	LPC	Lysophosphatidylcholine												RE-06	NF 14d
					9	LPE	Lysophosphatidylethanolamine												RE-07	NF 14d
					10	PC	Phosphatidylcholine												RE-08	NF 14d
					11	PE	Phosphatidylethanolamine												RE-09	NF 14d
					12	SM	Sphingomyelin												RE-10	NF 14d
					13	TAG	Triacylglycerol												QC-2	QC
																			RE-11	High Sugar Diet 14 days (HSD 14d)
																			RE-12	HSD 14d
	Sheet 2 Lipid Species Composition																		RE-13	HSD 14d
		In this sheet, each lipid in sheet 1 is expressed in % composition and is calculated as follows:																	RE-14	HSD 14d
			Composition (%)	=	(lipid concentration /sum of all lipids concentration from that class)*100														RE-15	HSD 14d
																			RE-16	HSD 14d
																			RE-17	HSD 14d
	Sheet 3 Lipid Class Concentration																		RE-18	HSD 14d
		This sheet provides total concentration for each of the 13 lipid classes. These are obtained by summing up individual lipid concentrations for the respective class in sheet 1.																	RE-19	HSD 14d
																			RE-20	HSD 14d
																			QC-3	QC
	Sheet 4 Lipid Class Composition
		This sheet shows % composition for each of the 13 lipid classes.
		Note: Sum of % composition of all 13 lipid classes is 100.
	Sheet 5 Fatty Acid Concentration
		This sheet sums the concentrations for all fatty acids that are the same in one lipid class.
		For example: PC(FA18:1) is the sum of the concentrations of PC(12:0/18:1), PC(14:0/18:1), PC(15:0/18:1), etc for all PC(x/18:1)
	Sheet 6 Fatty Acid Composition
		In this sheet, each fatty acid in sheet 5 is expressed in % composition and is calculated as follows
			Composition (%)	=	(fatty acid concentration /sum of all fatty acids concentration from that class)*100

## Sheet: Lipid Species Concentrations
Order	CE(12:0)	CE(14:0)	CE(14:1)	CE(15:0)	CE(16:0)	CE(16:1)	CE(17:0)	CE(18:0)	CE(18:1)	CE(18:2)	CE(18:3)	CE(18:4)	CE(20:0)	CE(20:1)	CE(20:2)	CE(20:3)	CE(20:4)	CE(20:5)	CE(22:0)	CE(22:1)	CE(22:2)	CE(22:4)	CE(22:5)	CE(22:6)	CE(24:0)	CE(24:1)	CER(14:0)	CER(16:0)	CER(18:0)	CER(20:0)	CER(22:0)	CER(24:0)	CER(24:1)	DAG(12:0/16:0)	DAG(12:0/18:0)	DAG(12:0/18:1)	DAG(12:0/18:2)	DAG(14:0/14:0)	DAG(14:0/16:0)	DAG(14:0/16:1)	DAG(14:0/18:1)	DAG(14:0/18:2)	DAG(14:0/18:3)	DAG(14:1/16:0)	DAG(14:1/18:1)	DAG(15:0/18:1)	DAG(15:0/18:2)	DAG(16:0/16:0)	DAG(16:0/16:1)
Prep Blank	.	.	.	.	0.0418	.	.	0.0427	0.0476	0.0835	.	.	.	.	.	.	.	.	.	.	.	.	.	.	.	.	0.0232	.	.	.	.	.	.	.	.	.	.	0.0242	.	.	.	.	.	.	.	.	.	0.254	.
QC-1	0.7068	23.9001	1.4638	6.5885	365.962	106.564	6.8163	40.8623	652.762	1456.43	59.9712	1.9258	55.7395	6.2604	1.7656	26.8088	208.299	39.5334	0.585	2.9989	20.3865	0.75	2.501	20.0641	5.2378	1.5841	.	0.4301	.	0.1408	0.9727	3.5206	1.8016	.	.	0.3768	.	.	0.3846	.	0.7969	0.423	.	.	0.5012	.	.	1.2522	0.5946
RE-01	.	0.3298	.	.	.	0.4463	.	.	0.371	0.3038	.	.	.	.	.	.	.	.	.	.	.	.	.	.	.	.	.	.	.	.	.	.	.	2.6457	0.742	2.4842	1.7509	36.9419	3.914	31.5965	4.6211	2.1849	0.5553	4.9088	1.1158	0.5053	.	1.4188	18.1789
RE-02	.	.	.	.	.	0.3819	.	.	0.2351	0.171	.	.	.	.	.	.	.	.	.	.	.	.	.	.	.	.	.	.	.	.	.	.	.	2.9963	0.5649	2.1352	1.4647	29.9201	4.5762	26.9766	4.0883	1.6633	.	4.8662	0.9297	0.411	0.2151	1.6699	17.3545
RE-03	.	.	.	.	.	0.3494	.	.	0.2741	0.191	.	.	.	.	.	.	.	.	.	.	.	.	.	.	.	.	.	.	.	.	.	.	.	2.8768	0.579	2.2997	1.6692	37.93	5.1392	31.2924	5.2092	2.2677	0.4352	4.763	0.9056	0.3432	0.2139	1.9198	21.1036
RE-04	.	0.224	.	.	0.1592	0.4183	.	.	0.2644	0.1112	.	.	.	.	.	.	.	.	.	.	.	.	.	.	.	.	.	.	.	.	.	.	.	3.0053	0.4334	1.5582	1.298	28.9608	3.9442	21.7452	3.1852	1.4172	0.3543	3.7095	0.8418	0.3249	.	1.7113	17.4597
RE-05	0.1833	0.2554	.	.	.	0.341	.	.	0.2295	0.1193	.	.	.	.	.	.	.	.	.	.	.	.	.	.	.	.	.	.	.	.	.	.	.	2.1143	0.5306	1.5632	1.093	23.6	4.0229	19.146	3.1951	1.2841	0.1788	3.8601	0.7313	0.3978	.	1.5214	15.5975
RE-06	.	0.2658	.	.	.	0.3831	.	.	0.2539	.	.	.	.	.	.	.	.	.	.	.	.	.	.	.	.	.	.	.	.	.	.	.	.	1.8338	0.4293	1.7963	1.0855	18.381	3.0004	22.3853	3.5897	1.1865	0.3462	3.2381	0.6183	0.422	0.1529	1.1622	15.6923
RE-07	.	0.2033	.	.	.	0.4167	.	.	0.3013	0.1435	.	.	.	.	.	.	.	.	.	.	.	.	.	.	.	.	.	.	.	.	.	.	.	2.1342	0.3913	1.6108	1.1224	15.7763	2.7053	15.8114	2.3089	1.1773	0.19	2.8228	0.581	0.3014	0.2036	1.1947	11.9501
RE-08	.	0.2087	.	.	.	0.2736	.	.	0.2818	.	.	.	.	.	.	.	.	.	.	.	.	.	.	.	.	.	.	.	.	.	.	.	.	2.2279	0.413	1.7306	1.2874	31.3916	4.1041	22.498	3.7932	1.6123	.	3.551	0.8571	0.3409	.	1.3876	14.5197
RE-09	.	.	.	.	.	0.4134	.	.	0.2799	.	.	.	.	.	.	.	.	.	.	.	.	.	.	.	.	.	.	.	.	.	.	.	.	2.6545	0.4137	1.8518	1.1793	36.457	3.8539	26.4064	3.9458	1.4759	.	4.0191	0.8988	0.3602	.	1.518	18.5689
RE-10	.	0.1582	.	.	.	0.3539	.	.	0.2526	0.1214	.	.	.	.	.	.	.	.	.	.	.	.	.	.	.	.	.	.	.	.	.	.	.	2.0971	0.4423	1.6762	1.2441	23.81	3.325	19.7214	3.1	1.673	0.3565	3.6571	0.6762	0.3524	.	1.2967	13.6667
QC-2	0.8461	23.4934	1.2964	6.5787	359.516	106.673	6.5937	40.1136	635.335	1480.14	60.5489	2.1854	55.6976	6.1728	1.813	26.3985	210.25	40.4971	0.6076	2.8771	20.0448	0.7476	2.6184	20.4654	5.0356	1.4958	.	0.3403	0.104	0.1161	0.7967	3.3205	1.7447	.	.	0.321	.	0.1635	0.7461	.	0.7155	0.2791	.	0.1462	0.4951	.	.	1.7086	0.5917
RE-11	.	.	.	.	.	0.7839	.	.	0.4175	0.3259	.	.	.	.	.	.	.	.	.	.	.	.	.	.	.	.	.	.	.	.	.	.	.	2.6265	.	3.6245	1.6265	41.7128	7.1197	68.468	11.5374	3.9417	.	6.5796	1.4966	0.5442	.	2.4021	35.9401
RE-12	.	0.3675	.	.	.	0.7695	.	.	0.2948	0.2954	.	.	.	.	.	.	.	.	.	.	.	.	.	.	.	.	.	.	.	.	.	.	.	3.153	0.5182	4.1771	1.9884	45.3843	7.8217	79.4114	11.9829	4.0638	.	7.64	1.7371	0.4686	.	2.6904	40.4571
RE-13	.	.	.	.	0.1683	0.3944	.	.	0.2512	.	.	.	.	.	.	.	.	.	.	.	.	.	.	.	.	.	.	.	.	.	.	.	.	2.659	.	2.3142	1.5258	40.7288	6.3437	42.5854	7.0524	3.3402	.	4.5116	0.9511	0.3845	0.2841	2.2872	22.915
RE-14	.	.	.	.	.	0.7604	.	.	.	.	.	.	.	.	.	.	.	.	.	.	.	.	.	.	.	.	.	.	.	.	.	.	.	2.2131	.	3.3086	1.2571	35.4038	5.8423	63.8114	12.8571	3.3091	.	5.6229	0.9257	0.4381	.	2.0892	33.9143
RE-15	.	.	.	.	.	0.7655	.	.	.	.	.	.	.	.	.	.	.	.	.	.	.	.	.	.	.	.	.	.	.	.	.	.	.	2.7345	0.5926	3.6331	1.9969	44.0497	6.6686	72.3248	12.403	4.2233	.	6.0451	1.7684	0.5192	.	2.8384	40.6015
RE-16	.	.	.	.	.	0.5907	.	.	0.2368	.	.	.	.	.	.	.	.	.	.	.	.	.	.	.	.	.	.	.	.	.	.	.	.	2.9015	0.5886	4.1985	1.6049	43.9958	6.0969	74.4467	12.7942	3.074	.	6.6978	1.3022	0.7591	.	2.3191	35.4628
RE-17	.	0.313	.	.	.	0.5745	.	.	0.3523	.	.	.	.	.	.	.	.	.	.	.	.	.	.	.	.	.	.	.	.	.	.	.	.	2.9517	0.3544	3.5481	1.8446	43.0442	7.5075	60.4427	12.0982	4.2048	.	5.8987	1.2632	0.7186	.	2.6158	32.112
RE-18	.	.	.	.	.	0.7827	.	.	0.3359	.	.	.	.	.	.	.	.	.	.	.	.	.	.	.	.	.	.	.	.	.	.	.	.	2.9309	0.476	3.364	1.6492	48.8805	7.9447	72.2733	13.3217	3.2045	.	6.0323	1.4559	0.6261	.	2.8512	39.4385
RE-19	.	.	.	.	.	0.7173	.	.	0.349	.	.	.	.	.	.	.	.	.	.	.	.	.	.	.	.	.	.	.	.	.	.	.	.	2.7169	.	3.6639	1.3853	47.2233	6.9703	72.3531	12.54	3.1362	.	6.7039	1.14	0.5955	.	2.453	39.5654
RE-20	.	0.3584	.	.	.	0.8628	.	.	0.5249	.	.	.	.	.	.	.	.	.	.	.	.	.	.	.	.	.	.	.	.	.	.	.	.	2.8798	0.4228	3.8104	2.0057	54.8333	9.0079	82.3941	13.0844	4.4686	.	7.437	1.5704	0.7941	.	2.8491	45.2919
QC-3	0.7845	22.8123	1.3311	6.1767	347.401	101.498	6.4139	39.2337	642.213	1471.8	58.9336	2.0949	56.7342	6.5901	1.8975	26.3548	205.702	39.7786	0.6161	3.0117	21.6228	0.7785	2.3715	20.6696	5.063	1.7269	.	0.3815	0.1219	0.1491	0.8916	3.5951	1.8736	.	.	0.256	.	.	0.4444	.	0.6517	0.2297	.	.	0.3161	0.1508	.	1.3037	0.5009
[truncated: 806 more columns]

## Sheet: Lipid Species Composition
Order	CE(12:0)	CE(14:0)	CE(14:1)	CE(15:0)	CE(16:0)	CE(16:1)	CE(17:0)	CE(18:0)	CE(18:1)	CE(18:2)	CE(18:3)	CE(18:4)	CE(20:0)	CE(20:1)	CE(20:2)	CE(20:3)	CE(20:4)	CE(20:5)	CE(22:0)	CE(22:1)	CE(22:2)	CE(22:4)	CE(22:5)	CE(22:6)	CE(24:0)	CE(24:1)	CER(14:0)	CER(16:0)	CER(18:0)	CER(20:0)	CER(22:0)	CER(24:0)	CER(24:1)	DAG(12:0/16:0)	DAG(12:0/18:0)	DAG(12:0/18:1)	DAG(12:0/18:2)	DAG(14:0/14:0)	DAG(14:0/16:0)	DAG(14:0/16:1)	DAG(14:0/18:1)	DAG(14:0/18:2)	DAG(14:0/18:3)	DAG(14:1/16:0)	DAG(14:1/18:1)	DAG(15:0/18:1)	DAG(15:0/18:2)	DAG(16:0/16:0)	DAG(16:0/16:1)
Prep Blank	.	.	.	.	19.3845	.	.	19.799	22.0911	38.7255	.	.	.	.	.	.	.	.	.	.	.	.	.	.	.	.	100	.	.	.	.	.	.	.	.	.	.	1.8804	.	.	.	.	.	.	.	.	.	19.7274	.
QC-1	0.0227	0.7669	0.047	0.2114	11.7429	3.4194	0.2187	1.3112	20.9456	46.7333	1.9243	0.0618	1.7885	0.2009	0.0567	0.8602	6.6838	1.2685	0.0188	0.0962	0.6542	0.0241	0.0803	0.6438	0.1681	0.0508	.	6.2644	.	2.0513	14.1675	51.2769	26.24	.	.	0.5922	.	.	0.6044	.	1.2524	0.6647	.	.	0.7876	.	.	1.968	0.9344
RE-01	.	22.7293	.	.	.	30.7592	.	.	25.5739	20.9375	.	.	.	.	.	.	.	.	.	.	.	.	.	.	.	.	.	.	.	.	.	.	.	1.6112	0.4519	1.5129	1.0663	22.4974	2.3836	19.2421	2.8142	1.3306	0.3382	2.9894	0.6795	0.3077	.	0.8641	11.0709
RE-02	.	.	.	.	.	48.4674	.	.	29.8379	21.6947	.	.	.	.	.	.	.	.	.	.	.	.	.	.	.	.	.	.	.	.	.	.	.	2.11	0.3978	1.5036	1.0315	21.0698	3.2225	18.9969	2.879	1.1713	.	3.4268	0.6547	0.2895	0.1515	1.1759	12.2211
RE-03	.	.	.	.	.	42.8983	.	.	33.6568	23.4449	.	.	.	.	.	.	.	.	.	.	.	.	.	.	.	.	.	.	.	.	.	.	.	1.6507	0.3322	1.3195	0.9577	21.7636	2.9488	17.9551	2.989	1.3012	0.2497	2.733	0.5196	0.1969	0.1227	1.1016	12.1089
RE-04	.	19.0287	.	.	13.5264	35.5393	.	.	22.4629	9.4427	.	.	.	.	.	.	.	.	.	.	.	.	.	.	.	.	.	.	.	.	.	.	.	2.2231	0.3206	1.1526	0.9602	21.4231	2.9177	16.0855	2.3562	1.0484	0.2621	2.744	0.6227	0.2404	.	1.2659	12.9154
RE-05	16.2443	22.6307	.	.	.	30.2186	.	.	20.3394	10.567	.	.	.	.	.	.	.	.	.	.	.	.	.	.	.	.	.	.	.	.	.	.	.	1.7418	0.4371	1.2878	0.9004	19.4419	3.3141	15.7727	2.6321	1.0578	0.1473	3.18	0.6024	0.3277	.	1.2534	12.8494
RE-06	.	29.436	.	.	.	42.4361	.	.	28.1279	.	.	.	.	.	.	.	.	.	.	.	.	.	.	.	.	.	.	.	.	.	.	.	.	1.6249	0.3804	1.5917	0.9619	16.2871	2.6586	19.8354	3.1808	1.0513	0.3067	2.8692	0.5479	0.3739	0.1355	1.0298	13.9047
RE-07	.	19.0916	.	.	.	39.1367	.	.	28.2974	13.4743	.	.	.	.	.	.	.	.	.	.	.	.	.	.	.	.	.	.	.	.	.	.	.	2.2439	0.4115	1.6936	1.1801	16.5869	2.8443	16.6238	2.4276	1.2378	0.1998	2.9678	0.6109	0.3168	0.2141	1.2561	12.5642
RE-08	.	27.3111	.	.	.	35.8084	.	.	36.8805	.	.	.	.	.	.	.	.	.	.	.	.	.	.	.	.	.	.	.	.	.	.	.	.	1.7006	0.3153	1.321	0.9827	23.9617	3.1327	17.173	2.8954	1.2307	.	2.7105	0.6543	0.2602	.	1.0591	11.0831
RE-09	.	.	.	.	.	59.6229	.	.	40.3771	.	.	.	.	.	.	.	.	.	.	.	.	.	.	.	.	.	.	.	.	.	.	.	.	1.7931	0.2794	1.2509	0.7966	24.6269	2.6034	17.8376	2.6654	0.997	.	2.7149	0.6071	0.2433	.	1.0254	12.5434
RE-10	.	17.8512	.	.	.	39.9423	.	.	28.5024	13.7042	.	.	.	.	.	.	.	.	.	.	.	.	.	.	.	.	.	.	.	.	.	.	.	1.8052	0.3807	1.4429	1.0709	20.4959	2.8622	16.9764	2.6685	1.4401	0.3069	3.1481	0.5821	0.3033	.	1.1162	11.7644
QC-2	0.0271	0.7535	0.0416	0.211	11.5302	3.4212	0.2115	1.2865	20.3761	47.4702	1.9419	0.0701	1.7863	0.198	0.0581	0.8466	6.743	1.2988	0.0195	0.0923	0.6429	0.024	0.084	0.6564	0.1615	0.048	.	5.2986	1.619	1.8082	12.4054	51.7031	27.1657	.	.	0.4766	.	0.2428	1.108	.	1.0625	0.4144	.	0.2171	0.7353	.	.	2.5374	0.8787
RE-11	.	.	.	.	.	51.3248	.	.	27.3391	21.3361	.	.	.	.	.	.	.	.	.	.	.	.	.	.	.	.	.	.	.	.	.	.	.	0.9889	.	1.3647	0.6124	15.706	2.6807	25.7801	4.3442	1.4842	.	2.4774	0.5635	0.2049	.	0.9045	13.5324
RE-12	.	21.2789	.	.	.	44.5528	.	.	17.0657	17.1026	.	.	.	.	.	.	.	.	.	.	.	.	.	.	.	.	.	.	.	.	.	.	.	1.0522	0.1729	1.394	0.6636	15.1459	2.6103	26.5016	3.999	1.3562	.	2.5497	0.5797	0.1564	.	0.8979	13.5016
RE-13	.	.	.	.	20.6781	48.4595	.	.	30.8625	.	.	.	.	.	.	.	.	.	.	.	.	.	.	.	.	.	.	.	.	.	.	.	.	1.3521	.	1.1768	0.7759	20.7111	3.2259	21.6552	3.5862	1.6985	.	2.2942	0.4836	0.1955	0.1445	1.163	11.6525
RE-14	.	.	.	.	.	100	.	.	.	.	.	.	.	.	.	.	.	.	.	.	.	.	.	.	.	.	.	.	.	.	.	.	.	0.9073	.	1.3564	0.5154	14.5141	2.3951	26.16	5.2709	1.3566	.	2.3051	0.3795	0.1796	.	0.8565	13.9034
RE-15	.	.	.	.	.	100	.	.	.	.	.	.	.	.	.	.	.	.	.	.	.	.	.	.	.	.	.	.	.	.	.	.	.	0.9408	0.2039	1.25	0.6871	15.1561	2.2945	24.8846	4.2675	1.4531	.	2.0799	0.6085	0.1786	.	0.9766	13.9697
RE-16	.	.	.	.	.	71.3814	.	.	28.6186	.	.	.	.	.	.	.	.	.	.	.	.	.	.	.	.	.	.	.	.	.	.	.	.	1.0425	0.2115	1.5085	0.5766	15.8071	2.1906	26.7478	4.5968	1.1044	.	2.4064	0.4679	0.2727	.	0.8332	12.7413
RE-17	.	25.2465	.	.	.	46.3359	.	.	28.4176	.	.	.	.	.	.	.	.	.	.	.	.	.	.	.	.	.	.	.	.	.	.	.	.	1.1502	0.1381	1.3826	0.7188	16.7735	2.9255	23.5533	4.7144	1.6385	.	2.2986	0.4922	0.28	.	1.0193	12.5134
RE-18	.	.	.	.	.	69.9742	.	.	30.0258	.	.	.	.	.	.	.	.	.	.	.	.	.	.	.	.	.	.	.	.	.	.	.	.	1.0221	0.166	1.1731	0.5751	17.0457	2.7705	25.2033	4.6456	1.1175	.	2.1036	0.5077	0.2183	.	0.9943	13.7531
RE-19	.	.	.	.	.	67.2695	.	.	32.7305	.	.	.	.	.	.	.	.	.	.	.	.	.	.	.	.	.	.	.	.	.	.	.	.	0.9693	.	1.3071	0.4942	16.8473	2.4867	25.8126	4.4738	1.1189	.	2.3917	0.4067	0.2125	.	0.8751	14.1153
RE-20	.	20.5274	.	.	.	49.4129	.	.	30.0597	.	.	.	.	.	.	.	.	.	.	.	.	.	.	.	.	.	.	.	.	.	.	.	.	0.8774	0.1288	1.1609	0.6111	16.7061	2.7444	25.1031	3.9865	1.3614	.	2.2659	0.4784	0.2419	.	0.868	13.7991
QC-3	0.0254	0.7374	0.043	0.1997	11.2296	3.2809	0.2073	1.2682	20.7593	47.5755	1.905	0.0677	1.8339	0.213	0.0613	0.8519	6.6493	1.2858	0.0199	0.0974	0.6989	0.0252	0.0767	0.6681	0.1637	0.0558	.	5.4406	1.7387	2.1255	12.7134	51.2649	26.7169	.	.	0.4204	.	.	0.73	.	1.0704	0.3773	.	.	0.5192	0.2476	.	2.1414	0.8228
[truncated: 806 more columns]

## Sheet: Lipid Class Concentration
Order	CE	CER	DAG	DCER	FFA	HCER	LCER	LPC	LPE	PC	PE	SM	TAG
Prep Blank	0.2155	0.0232	1.2877	0.4327	137.401	.	.	.	.	.	.	1.5657	1.1039
QC-1	3116.46	6.8658	63.6302	.	489.631	4.1302	2.8866	531.584	7.5505	2884.79	205.222	464.369	1170.77
RE-01	1.4508	.	164.205	.	10513.8	.	.	27.4767	60.7246	1103.13	2972.56	47.9191	7500.62
RE-02	0.7881	.	142.005	.	10210.4	.	.	32.5661	74.0223	1001.23	2724.01	37.92	6181.5
RE-03	0.8145	.	174.282	.	9043.14	.	.	21.78	46.2005	1292.45	3687.08	56.5405	5143.31
RE-04	1.1771	.	135.185	.	8918.46	.	.	24.5528	55.9369	1051.12	2834.9	43.2084	5591.36
RE-05	1.1286	.	121.387	0.5006	9670.13	.	.	26.3002	52.7976	996.544	2936.9	40.6594	4315.29
RE-06	0.9028	.	112.856	.	8817.22	.	.	31.368	74.193	826.418	2208.36	29.3568	6487.72
RE-07	1.0646	.	95.1129	0.1541	10286.8	.	.	46.0755	80.3633	709.967	2286.05	28.7877	5068.19
RE-08	0.764	.	131.008	0.2428	9198.51	.	.	26.9205	67.8132	867.547	2358.59	34.0254	6246.52
RE-09	0.6933	.	148.037	.	8574.78	0.0878	.	45.5146	74.3634	992.465	2846.77	40.2303	6954.15
RE-10	0.8861	.	116.17	.	8011.71	.	.	25.7424	54.6077	916.277	2651.29	34.0239	5143.61
QC-2	3118.05	6.4223	67.3358	0.7312	530.847	3.8654	2.7915	509.834	7.2696	2889.65	219.604	461.697	1146.58
RE-11	1.5273	.	265.585	.	6886.94	.	.	17.3488	31.6669	1359.66	3501.53	59.5676	14392.1
RE-12	1.7272	.	299.648	.	7769.11	.	.	18.1823	33.6452	1140.28	3313.03	52.679	15411.6
RE-13	0.814	.	196.653	.	6079.41	.	.	19.6602	28.025	1470.76	3659.07	57.2319	7921.44
RE-14	0.7604	.	243.927	.	6439.03	.	.	12.1298	24.8391	1194.02	2995.45	52.0667	15441.9
RE-15	0.7655	.	290.64	.	7638.23	.	.	22.315	39.6738	1161.2	2671.99	49.4844	17429.1
RE-16	0.8275	.	278.329	.	6874.17	.	.	16.2995	31.4708	1291.53	3293.66	51.0943	12327.3
RE-17	1.2398	.	256.621	.	6809.54	.	.	23.894	32.7829	1147.81	3097.23	48.0823	12184.5
RE-18	1.1186	.	286.762	.	6997.99	.	.	21.9661	43.7065	1155.08	3005.26	50.4015	15727.1
RE-19	1.0663	.	280.302	.	7113.59	.	.	21.4999	41.8178	1245.85	3208.46	48.5573	15926.4
RE-20	1.7462	.	328.223	.	8052.82	.	.	20.8086	31.5456	1456.26	4259.3	65.6166	15334.6
QC-3	3093.61	7.0128	60.8803	0.6035	510.784	4.1887	2.7261	527.916	7.0697	2881.81	224.975	475.764	1146.08

## Sheet: Lipid Class Composition
Order	CE	CER	DAG	DCER	FFA	HCER	LCER	LPC	LPE	PC	PE	SM	TAG
Prep Blank	0.1517	0.0164	0.9066	0.3046	96.741	.	.	.	.	.	.	1.1024	0.7773
QC-1	34.8291	0.0767	0.7111	.	5.472	0.0462	0.0323	5.9409	0.0844	32.2399	2.2935	5.1897	13.0843
RE-01	0.0065	.	0.7333	.	46.9536	.	.	0.1227	0.2712	4.9265	13.2752	0.214	33.4971
RE-02	0.0039	.	0.6959	.	50.0402	.	.	0.1596	0.3628	4.9069	13.3501	0.1858	30.2948
RE-03	0.0042	.	0.8953	.	46.457	.	.	0.1119	0.2373	6.6396	18.9415	0.2905	26.4226
RE-04	0.0063	.	0.7246	.	47.805	.	.	0.1316	0.2998	5.6342	15.1957	0.2316	29.971
RE-05	0.0062	.	0.6684	0.0028	53.2448	.	.	0.1448	0.2907	5.4871	16.1709	0.2239	23.7605
RE-06	0.0049	.	0.6071	.	47.434	.	.	0.1688	0.3991	4.4459	11.8803	0.1579	34.902
RE-07	0.0057	.	0.5113	0.0008	55.2977	.	.	0.2477	0.432	3.8165	12.2889	0.1548	27.2446
RE-08	0.004	.	0.692	0.0013	48.5873	.	.	0.1422	0.3582	4.5825	12.4583	0.1797	32.9946
RE-09	0.0035	.	0.7523	.	43.5775	0.0004	.	0.2313	0.3779	5.0438	14.4674	0.2045	35.3414
RE-10	0.0052	.	0.6852	.	47.2547	.	.	0.1518	0.3221	5.4044	15.6378	0.2007	30.3381
QC-2	34.7815	0.0716	0.7511	0.0082	5.9215	0.0431	0.0311	5.6871	0.0811	32.2337	2.4497	5.1502	12.79
RE-11	0.0058	.	1.0016	.	25.9729	.	.	0.0654	0.1194	5.1277	13.2054	0.2246	54.2771
RE-12	0.0062	.	1.0687	.	27.7074	.	.	0.0648	0.12	4.0666	11.8154	0.1879	54.963
RE-13	0.0042	.	1.0119	.	31.2838	.	.	0.1012	0.1442	7.5683	18.8291	0.2945	40.7627
RE-14	0.0029	.	0.9238	.	24.3864	.	.	0.0459	0.0941	4.5221	11.3446	0.1972	58.4829
RE-15	0.0026	.	0.9918	.	26.066	.	.	0.0762	0.1354	3.9627	9.1184	0.1689	59.4781
RE-16	0.0034	.	1.1518	.	28.4472	.	.	0.0675	0.1302	5.3447	13.6301	0.2114	51.0136
RE-17	0.0053	.	1.0873	.	28.8519	.	.	0.1012	0.1389	4.8632	13.1229	0.2037	51.6255
RE-18	0.0041	.	1.0508	.	25.6436	.	.	0.0805	0.1602	4.2327	11.0126	0.1847	57.6309
RE-19	0.0038	.	1.0051	.	25.5082	.	.	0.0771	0.15	4.4674	11.505	0.1741	57.1093
RE-20	0.0059	.	1.1107	.	27.2507	.	.	0.0704	0.1068	4.928	14.4134	0.222	51.892
QC-3	34.5909	0.0784	0.6807	0.0067	5.7113	0.0468	0.0305	5.9028	0.079	32.2226	2.5155	5.3197	12.8148

## Sheet: Fatty Acid Concentration
Order	CE(FA12:0)	CE(FA14:0)	CE(FA14:1)	CE(FA15:0)	CE(FA16:0)	CE(FA16:1)	CE(FA17:0)	CE(FA18:0)	CE(FA18:1)	CE(FA18:2)	CE(FA18:3)	CE(FA18:4)	CE(FA20:0)	CE(FA20:1)	CE(FA20:2)	CE(FA20:3)	CE(FA20:4)	CE(FA20:5)	CE(FA22:0)	CE(FA22:1)	CE(FA22:2)	CE(FA22:4)	CE(FA22:5)	CE(FA22:6)	CE(FA24:0)	CE(FA24:1)	CER(FA14:0)	CER(FA16:0)	CER(FA18:0)	CER(FA20:0)	CER(FA22:0)	CER(FA24:0)	CER(FA24:1)	DAG(FA12:0)	DAG(FA14:0)	DAG(FA14:1)	DAG(FA15:0)	DAG(FA16:0)	DAG(FA16:1)	DAG(FA18:0)	DAG(FA18:1)	DAG(FA18:2)	DAG(FA18:3)	DAG(FA20:0)	DAG(FA20:1)	DAG(FA20:3)	DAG(FA20:4)	DAG(FA20:5)	DAG(FA22:5)
Prep Blank	.	.	.	.	0.0418	.	.	0.0427	0.0476	0.0835	.	.	.	.	.	.	.	.	.	.	.	.	.	.	.	.	0.0232	.	.	.	.	.	.	.	0.0484	.	.	1.5175	.	0.9883	.	.	.	.	.	.	.	.	0.0211
QC-1	0.7068	23.9001	1.4638	6.5885	365.962	106.564	6.8163	40.8623	652.762	1456.43	59.9712	1.9258	55.7395	6.2604	1.7656	26.8088	208.299	39.5334	0.585	2.9989	20.3865	0.75	2.501	20.0641	5.2378	1.5841	.	0.4301	.	0.1408	0.9727	3.5206	1.8016	0.3768	1.6044	0.5012	.	15.0071	2.6612	3.1	28.4443	9.176	.	64.876	.	.	1.071	0.1085	0.0913
RE-01	.	0.3298	.	.	.	0.4463	.	.	0.371	0.3038	.	.	.	.	.	.	.	.	.	.	.	.	.	.	.	.	.	.	.	.	.	.	.	7.6229	116.756	6.0246	0.5053	42.841	95.6575	7.8924	30.422	16.8553	3.8336	.	.	.	.	.	.
RE-02	.	.	.	.	.	0.3819	.	.	0.2351	0.171	.	.	.	.	.	.	.	.	.	.	.	.	.	.	.	.	.	.	.	.	.	.	.	7.1611	97.1445	5.7959	0.6261	41.7384	83.9963	6.3434	26.4621	14.7417	.	.	.	.	.	.	.
RE-03	.	.	.	.	.	0.3494	.	.	0.2741	0.191	.	.	.	.	.	.	.	.	.	.	.	.	.	.	.	.	.	.	.	.	.	.	.	7.4247	120.204	5.6686	0.5571	50.1849	102.319	8.2254	32.463	18.4704	3.0466	.	.	.	.	.	.
RE-04	.	0.224	.	.	0.1592	0.4183	.	.	0.2644	0.1112	.	.	.	.	.	.	.	.	.	.	.	.	.	.	.	.	.	.	.	.	.	.	.	6.2949	88.5678	4.5514	0.3249	40.4882	81.1909	7.2981	24.4862	13.8872	3.1486	.	0.1321	.	.	.	.
RE-05	0.1833	0.2554	.	.	.	0.341	.	.	0.2295	0.1193	.	.	.	.	.	.	.	.	.	.	.	.	.	.	.	.	.	.	.	.	.	.	.	5.3011	75.0268	4.5914	0.3978	38.6297	71.603	6.9127	24.9561	13.5793	1.6071	.	0.1693	.	.	.	.
RE-06	.	0.2658	.	.	.	0.3831	.	.	0.2539	.	.	.	.	.	.	.	.	.	.	.	.	.	.	.	.	.	.	.	.	.	.	.	.	5.1449	67.2701	3.8564	0.5749	33.9225	73.6662	5.1285	23.7121	10.4675	1.9685	.	.	.	.	.	.
RE-07	.	0.2033	.	.	.	0.4167	.	.	0.3013	0.1435	.	.	.	.	.	.	.	.	.	.	.	.	.	.	.	.	.	.	.	.	.	.	.	5.2588	53.7455	3.4038	0.505	29.5088	58.1598	6.2422	19.9238	11.7311	1.7469	.	.	.	.	.	.
RE-08	.	0.2087	.	.	.	0.2736	.	.	0.2818	.	.	.	.	.	.	.	.	.	.	.	.	.	.	.	.	.	.	.	.	.	.	.	.	5.6589	94.7907	4.4082	0.3409	35.929	74.8914	5.6317	25.6824	14.682	.	.	.	.	.	.	.
RE-09	.	.	.	.	.	0.4134	.	.	0.2799	.	.	.	.	.	.	.	.	.	.	.	.	.	.	.	.	.	.	.	.	.	.	.	.	6.0993	108.596	4.9179	0.3602	40.6848	88.2785	5.6396	27.426	14.0724	.	.	.	.	.	.	.
RE-10	.	0.1582	.	.	.	0.3539	.	.	0.2526	0.1214	.	.	.	.	.	.	.	.	.	.	.	.	.	.	.	.	.	.	.	.	.	.	.	5.4597	75.7961	4.3333	0.3524	33.1642	68.8424	5.6696	22.2913	14.1875	2.2428	.	.	.	.	.	.
QC-2	0.8461	23.4934	1.2964	6.5787	359.516	106.673	6.5937	40.1136	635.335	1480.14	60.5489	2.1854	55.6976	6.1728	1.813	26.3985	210.25	40.4971	0.6076	2.8771	20.0448	0.7476	2.6184	20.4654	5.0356	1.4958	.	0.3403	0.104	0.1161	0.7967	3.3205	1.7447	0.321	2.0676	0.6413	.	17.0028	2.4069	3.0749	29.0164	8.7447	0.5312	67.8564	0.2281	0.4595	1.4129	0.2182	0.2329
RE-11	.	.	.	.	.	0.7839	.	.	0.4175	0.3259	.	.	.	.	.	.	.	.	.	.	.	.	.	.	.	.	.	.	.	.	.	.	.	7.8775	174.493	8.0762	0.5442	74.195	181.569	8.5688	51.1319	24.7152	.	.	.	.	.	.	.
RE-12	.	0.3675	.	.	.	0.7695	.	.	0.2948	0.2954	.	.	.	.	.	.	.	.	.	.	.	.	.	.	.	.	.	.	.	.	.	.	.	9.8368	194.048	9.3771	0.4686	82.3966	208.536	9.7824	57.574	27.2754	.	.	.	.	.	.	.
RE-13	.	.	.	.	0.1683	0.3944	.	.	0.2512	.	.	.	.	.	.	.	.	.	.	.	.	.	.	.	.	.	.	.	.	.	.	.	.	6.499	140.779	5.4627	0.6686	54.9162	117.975	7.1562	36.2031	23.6449	.	.	.	.	.	.	.
RE-14	.	.	.	.	.	0.7604	.	.	.	.	.	.	.	.	.	.	.	.	.	.	.	.	.	.	.	.	.	.	.	.	.	.	.	6.7788	156.628	6.5486	0.4381	69.5693	164.924	8.4612	53.7274	20.7792	.	.	.	.	.	.	.
RE-15	.	.	.	.	.	0.7655	.	.	.	.	.	.	.	.	.	.	.	.	.	.	.	.	.	.	.	.	.	.	.	.	.	.	.	8.957	183.719	7.8135	0.5192	79.9106	203.115	9.9254	59.4512	27.8698	.	.	.	.	.	.	.
RE-16	.	.	.	.	.	0.5907	.	.	0.2368	.	.	.	.	.	.	.	.	.	.	.	.	.	.	.	.	.	.	.	.	.	.	.	.	9.2936	184.403	8	0.7591	73.151	191.48	10.9209	57.2121	21.4371	.	.	.	.	.	.	.
RE-17	.	0.313	.	.	.	0.5745	.	.	0.3523	.	.	.	.	.	.	.	.	.	.	.	.	.	.	.	.	.	.	.	.	.	.	.	.	8.6987	170.341	7.1618	0.7186	71.2041	164.629	8.9967	53.9996	27.4916	.	.	.	.	.	.	.
RE-18	.	.	.	.	.	0.7827	.	.	0.3359	.	.	.	.	.	.	.	.	.	.	.	.	.	.	.	.	.	.	.	.	.	.	.	.	8.4201	194.505	7.4882	0.6261	80.509	191.771	9.4552	57.4987	23.2492	.	.	.	.	.	.	.
RE-19	.	.	.	.	.	0.7173	.	.	0.349	.	.	.	.	.	.	.	.	.	.	.	.	.	.	.	.	.	.	.	.	.	.	.	.	7.7661	189.446	7.8439	0.5955	77.107	192.161	7.8591	55.2745	22.5499	.	.	.	.	.	.	.
RE-20	.	0.3584	.	.	.	0.8628	.	.	0.5249	.	.	.	.	.	.	.	.	.	.	.	.	.	.	.	.	.	.	.	.	.	.	.	.	9.1187	218.622	9.0074	0.7941	90.77	223.799	11.222	62.7299	30.3829	.	.	.	.	.	.	.
QC-3	0.7845	22.8123	1.3311	6.1767	347.401	101.498	6.4139	39.2337	642.213	1471.8	58.9336	2.0949	56.7342	6.5901	1.8975	26.3548	205.702	39.7786	0.6161	3.0117	21.6228	0.7785	2.3715	20.6696	5.063	1.7269	.	0.3815	0.1219	0.1491	0.8916	3.5951	1.8736	0.256	1.3258	0.3161	0.1508	13.7164	1.9262	2.72	25.0755	8.27	0.6081	65.0905	0.1408	0.2578	1.1613	0.2082	0.1546
[truncated: 144 more columns]

## Sheet: Fatty Acid Composition
Order	CE(FA12:0)	CE(FA14:0)	CE(FA14:1)	CE(FA15:0)	CE(FA16:0)	CE(FA16:1)	CE(FA17:0)	CE(FA18:0)	CE(FA18:1)	CE(FA18:2)	CE(FA18:3)	CE(FA18:4)	CE(FA20:0)	CE(FA20:1)	CE(FA20:2)	CE(FA20:3)	CE(FA20:4)	CE(FA20:5)	CE(FA22:0)	CE(FA22:1)	CE(FA22:2)	CE(FA22:4)	CE(FA22:5)	CE(FA22:6)	CE(FA24:0)	CE(FA24:1)	CER(FA14:0)	CER(FA16:0)	CER(FA18:0)	CER(FA20:0)	CER(FA22:0)	CER(FA24:0)	CER(FA24:1)	DAG(FA12:0)	DAG(FA14:0)	DAG(FA14:1)	DAG(FA15:0)	DAG(FA16:0)	DAG(FA16:1)	DAG(FA18:0)	DAG(FA18:1)	DAG(FA18:2)	DAG(FA18:3)	DAG(FA20:0)	DAG(FA20:1)	DAG(FA20:3)	DAG(FA20:4)	DAG(FA20:5)	DAG(FA22:5)
Prep Blank	.	.	.	.	19.3845	.	.	19.799	22.0911	38.7255	.	.	.	.	.	.	.	.	.	.	.	.	.	.	.	.	100	.	.	.	.	.	.	.	1.8804	.	.	58.9235	.	38.3767	.	.	.	.	.	.	.	.	0.8194
QC-1	0.0227	0.7669	0.047	0.2114	11.7429	3.4194	0.2187	1.3112	20.9456	46.7333	1.9243	0.0618	1.7885	0.2009	0.0567	0.8602	6.6838	1.2685	0.0188	0.0962	0.6542	0.0241	0.0803	0.6438	0.1681	0.0508	.	6.2644	.	2.0513	14.1675	51.2769	26.24	0.2961	1.2607	0.3938	.	11.7924	2.0911	2.4359	22.3513	7.2105	.	50.9789	.	.	0.8416	0.0853	0.0717
RE-01	.	22.7293	.	.	.	30.7592	.	.	25.5739	20.9375	.	.	.	.	.	.	.	.	.	.	.	.	.	.	.	.	.	.	.	.	.	.	.	2.3211	35.5518	1.8345	0.1539	13.045	29.1274	2.4032	9.2634	5.1324	1.1673	.	.	.	.	.	.
RE-02	.	.	.	.	.	48.4674	.	.	29.8379	21.6947	.	.	.	.	.	.	.	.	.	.	.	.	.	.	.	.	.	.	.	.	.	.	.	2.5214	34.2047	2.0407	0.2205	14.6961	29.5752	2.2335	9.3173	5.1906	.	.	.	.	.	.	.
RE-03	.	.	.	.	.	42.8983	.	.	33.6568	23.4449	.	.	.	.	.	.	.	.	.	.	.	.	.	.	.	.	.	.	.	.	.	.	.	2.1301	34.4855	1.6263	0.1598	14.3977	29.3544	2.3598	9.3134	5.299	0.8741	.	.	.	.	.	.
RE-04	.	19.0287	.	.	13.5264	35.5393	.	.	22.4629	9.4427	.	.	.	.	.	.	.	.	.	.	.	.	.	.	.	.	.	.	.	.	.	.	.	2.3282	32.758	1.6834	0.1202	14.9751	30.0295	2.6993	9.0565	5.1364	1.1645	.	0.0489	.	.	.	.
RE-05	16.2443	22.6307	.	.	.	30.2186	.	.	20.3394	10.567	.	.	.	.	.	.	.	.	.	.	.	.	.	.	.	.	.	.	.	.	.	.	.	2.1835	30.9039	1.8912	0.1639	15.9118	29.4936	2.8474	10.2795	5.5934	0.662	.	0.0697	.	.	.	.
RE-06	.	29.436	.	.	.	42.4361	.	.	28.1279	.	.	.	.	.	.	.	.	.	.	.	.	.	.	.	.	.	.	.	.	.	.	.	.	2.2794	29.8036	1.7086	0.2547	15.0291	32.6373	2.2721	10.5055	4.6376	0.8721	.	.	.	.	.	.
RE-07	.	19.0916	.	.	.	39.1367	.	.	28.2974	13.4743	.	.	.	.	.	.	.	.	.	.	.	.	.	.	.	.	.	.	.	.	.	.	.	2.7645	28.2536	1.7893	0.2655	15.5125	30.5741	3.2815	10.4738	6.1669	0.9184	.	.	.	.	.	.
RE-08	.	27.3111	.	.	.	35.8084	.	.	36.8805	.	.	.	.	.	.	.	.	.	.	.	.	.	.	.	.	.	.	.	.	.	.	.	.	2.1598	36.1776	1.6824	0.1301	13.7126	28.5828	2.1494	9.8019	5.6035	.	.	.	.	.	.	.
RE-09	.	.	.	.	.	59.6229	.	.	40.3771	.	.	.	.	.	.	.	.	.	.	.	.	.	.	.	.	.	.	.	.	.	.	.	.	2.06	36.6786	1.661	0.1216	13.7414	29.8163	1.9048	9.2632	4.753	.	.	.	.	.	.	.
RE-10	.	17.8512	.	.	.	39.9423	.	.	28.5024	13.7042	.	.	.	.	.	.	.	.	.	.	.	.	.	.	.	.	.	.	.	.	.	.	.	2.3499	32.623	1.8651	0.1517	14.274	29.6301	2.4402	9.5943	6.1064	0.9653	.	.	.	.	.	.
QC-2	0.0271	0.7535	0.0416	0.211	11.5302	3.4212	0.2115	1.2865	20.3761	47.4702	1.9419	0.0701	1.7863	0.198	0.0581	0.8466	6.743	1.2988	0.0195	0.0923	0.6429	0.024	0.084	0.6564	0.1615	0.048	.	5.2986	1.619	1.8082	12.4054	51.7031	27.1657	0.2383	1.5353	0.4762	.	12.6254	1.7872	2.2833	21.546	6.4933	0.3944	50.3866	0.1694	0.3412	1.0491	0.162	0.173
RE-11	.	.	.	.	.	51.3248	.	.	27.3391	21.3361	.	.	.	.	.	.	.	.	.	.	.	.	.	.	.	.	.	.	.	.	.	.	.	1.483	32.8506	1.5205	0.1025	13.9682	34.1828	1.6132	9.6263	4.653	.	.	.	.	.	.	.
RE-12	.	21.2789	.	.	.	44.5528	.	.	17.0657	17.1026	.	.	.	.	.	.	.	.	.	.	.	.	.	.	.	.	.	.	.	.	.	.	.	1.6414	32.3794	1.5647	0.0782	13.7489	34.7969	1.6323	9.6069	4.5512	.	.	.	.	.	.	.
RE-13	.	.	.	.	20.6781	48.4595	.	.	30.8625	.	.	.	.	.	.	.	.	.	.	.	.	.	.	.	.	.	.	.	.	.	.	.	.	1.6524	35.7939	1.3889	0.17	13.9627	29.9958	1.8195	9.2048	6.0118	.	.	.	.	.	.	.
RE-14	.	.	.	.	.	100	.	.	.	.	.	.	.	.	.	.	.	.	.	.	.	.	.	.	.	.	.	.	.	.	.	.	.	1.3895	32.1054	1.3423	0.0898	14.2603	33.806	1.7344	11.013	4.2593	.	.	.	.	.	.	.
RE-15	.	.	.	.	.	100	.	.	.	.	.	.	.	.	.	.	.	.	.	.	.	.	.	.	.	.	.	.	.	.	.	.	.	1.5409	31.6059	1.3442	0.0893	13.7473	34.9426	1.7075	10.2276	4.7945	.	.	.	.	.	.	.
RE-16	.	.	.	.	.	71.3814	.	.	28.6186	.	.	.	.	.	.	.	.	.	.	.	.	.	.	.	.	.	.	.	.	.	.	.	.	1.6695	33.1269	1.4372	0.1364	13.1411	34.3982	1.9619	10.2778	3.851	.	.	.	.	.	.	.
RE-17	.	25.2465	.	.	.	46.3359	.	.	28.4176	.	.	.	.	.	.	.	.	.	.	.	.	.	.	.	.	.	.	.	.	.	.	.	.	1.6949	33.1894	1.3954	0.14	13.8734	32.0763	1.7529	10.5213	5.3565	.	.	.	.	.	.	.
RE-18	.	.	.	.	.	69.9742	.	.	30.0258	.	.	.	.	.	.	.	.	.	.	.	.	.	.	.	.	.	.	.	.	.	.	.	.	1.4681	33.9141	1.3056	0.1092	14.0376	33.4374	1.6486	10.0255	4.0537	.	.	.	.	.	.	.
RE-19	.	.	.	.	.	67.2695	.	.	32.7305	.	.	.	.	.	.	.	.	.	.	.	.	.	.	.	.	.	.	.	.	.	.	.	.	1.3853	33.7933	1.3992	0.1062	13.7543	34.2776	1.4019	9.8598	4.0224	.	.	.	.	.	.	.
RE-20	.	20.5274	.	.	.	49.4129	.	.	30.0597	.	.	.	.	.	.	.	.	.	.	.	.	.	.	.	.	.	.	.	.	.	.	.	.	1.3891	33.3039	1.3721	0.121	13.8275	34.0925	1.7095	9.556	4.6284	.	.	.	.	.	.	.
QC-3	0.0254	0.7374	0.043	0.1997	11.2296	3.2809	0.2073	1.2682	20.7593	47.5755	1.905	0.0677	1.8339	0.213	0.0613	0.8519	6.6493	1.2858	0.0199	0.0974	0.6989	0.0252	0.0767	0.6681	0.1637	0.0558	.	5.4406	1.7387	2.1255	12.7134	51.2649	26.7169	0.2102	1.0889	0.2596	0.1238	11.2651	1.582	2.2339	20.5941	6.792	0.4994	53.4578	0.1156	0.2117	0.9537	0.171	0.127
[truncated: 144 more columns]

## Sheet: QC
Order	CE(12:0)	CE(14:0)	CE(14:1)	CE(15:0)	CE(16:0)	CE(16:1)	CE(17:0)	CE(18:0)	CE(18:1)	CE(18:2)	CE(18:3)	CE(18:4)	CE(20:0)	CE(20:1)	CE(20:2)	CE(20:3)	CE(20:4)	CE(20:5)	CE(22:0)	CE(22:1)	CE(22:2)	CE(22:4)	CE(22:5)	CE(22:6)	CE(24:0)	CE(24:1)	CER(14:0)	CER(16:0)	CER(18:0)	CER(20:0)	CER(22:0)	CER(24:0)	CER(24:1)	DAG(12:0/16:0)	DAG(12:0/18:0)	DAG(12:0/18:1)	DAG(12:0/18:2)	DAG(14:0/14:0)	DAG(14:0/16:0)	DAG(14:0/16:1)	DAG(14:0/18:1)	DAG(14:0/18:2)	DAG(14:0/18:3)	DAG(14:1/16:0)	DAG(14:1/18:1)	DAG(15:0/18:1)	DAG(15:0/18:2)	DAG(16:0/16:0)	DAG(16:0/16:1)
QC-1	0.7068	23.9001	1.4638	6.5885	365.962	106.564	6.8163	40.8623	652.762	1456.43	59.9712	1.9258	55.7395	6.2604	1.7656	26.8088	208.299	39.5334	0.585	2.9989	20.3865	0.75	2.501	20.0641	5.2378	1.5841	.	0.4301	.	0.1408	0.9727	3.5206	1.8016	.	.	0.3768	.	.	0.3846	.	0.7969	0.423	.	.	0.5012	.	.	1.2522	0.5946
QC-2	0.8461	23.4934	1.2964	6.5787	359.516	106.673	6.5937	40.1136	635.335	1480.14	60.5489	2.1854	55.6976	6.1728	1.813	26.3985	210.25	40.4971	0.6076	2.8771	20.0448	0.7476	2.6184	20.4654	5.0356	1.4958	.	0.3403	0.104	0.1161	0.7967	3.3205	1.7447	.	.	0.321	.	0.1635	0.7461	.	0.7155	0.2791	.	0.1462	0.4951	.	.	1.7086	0.5917
QC-3	0.7845	22.8123	1.3311	6.1767	347.401	101.498	6.4139	39.2337	642.213	1471.8	58.9336	2.0949	56.7342	6.5901	1.8975	26.3548	205.702	39.7786	0.6161	3.0117	21.6228	0.7785	2.3715	20.6696	5.063	1.7269	.	0.3815	0.1219	0.1491	0.8916	3.5951	1.8736	.	.	0.256	.	.	0.4444	.	0.6517	0.2297	.	.	0.3161	0.1508	.	1.3037	0.5009
		2.34869	6.47851	3.64417	2.63515	2.81864	3.05055	2.0344	1.36422	0.81876	1.3683	6.36962	1.04672	3.47012	3.6603	0.944382	1.09637	1.25411	2.6661	2.50771	4.01354	2.26562	4.94598	1.51007	2.14567	7.2782	#DIV/0!	11.707	11.206	12.6841	9.93124	4.08214	3.57556	#DIV/0!	#DIV/0!	19.016	#DIV/0!	#DIV/0!	36.9063	#DIV/0!	10.0888	32.3329	#DIV/0!	#DIV/0!	24.0363	#DIV/0!	#DIV/0!	17.5846	9.47374
	Median	4.61769
	Mean	6.26876
[truncated: 806 more columns]
