# Supplementary material for: Fat body phospholipid state dictates hunger-driven feeding behavior
Source: eLife journal article supplement (doi:10.7554/elife.80282), 2022-10-06
Supplement: supp [file elife-80282-supp-v1.zip › elife_poa_e80282_Figure_4_source_data_1.xlsx]

## Sheet: in
Mean number of ApoII puncta
	ND	HSD
	525	280
	489	369
	640	112
	319	300
	485	223
	509
% area covered by ApoII puncta
	ND	HSD
	1.339	1.304
	2.933	1.028
	2.353	0.327
	1.069	1.164
	1.732	1.413
	1.596
