# Supplementary material for: Fat body phospholipid state dictates hunger-driven feeding behavior
Source: eLife journal article supplement (doi:10.7554/elife.80282), 2022-10-06
Supplement: supp [file elife-80282-supp-v1.zip › elife_poa_e80282_Figure_4_source_data_2.xlsx]

## Sheet: Sheet1
Number of ApoII puncta
	Luc	eas	Pect
	529	580	36
	465	493	210
	439	590	253
	511	598	153
	368	489	200
	501	315	190
		607	112
%area covered by ApoII puncta
	Luc	eas	Pect
	20.343	30.702	4.696
	19.1	10.647	5.912
	15.974	30.126	6.131
	26.443	13.204	9.269
	13.13	18.796	4.234
	13.119	7.185	4.789
		16.677	3.648
