# Supplementary material for: Fat body phospholipid state dictates hunger-driven feeding behavior
Source: eLife journal article supplement (doi:10.7554/elife.80282), 2022-10-06
Supplement: supp [file elife-80282-supp-v1.zip › elife_poa_e80282_Figure_4_source_data_3.xlsx]

## Sheet: Sheet1
		number of ApoII puncta
	sample number	LppGal4>UAS-Luc	LppGal4>UAS-PECT
	1	406	13.175
	2	187	7.3
	3	402	8.901
	4	376	8.377
	5	410	8.984
	6	203	5.976
	7	67	1.849
	mean	293	7.79457
		%Area covered by ApoII puncta
	sample number	LppGal4>UAS-Luc	LppGal4>UAS-PECT
	1	324	7.829
	2	336	11.138
	3	631	20.877
	4	650	20.224
	5	732	18.825
	6	520	11.51
	7	485	7.253
	mean	525.429	13.9509
