# Supplementary material for: Fat body phospholipid state dictates hunger-driven feeding behavior
Source: eLife journal article supplement (doi:10.7554/elife.80282), 2022-10-06
Supplement: supp [file elife-80282-supp-v1.zip › elife_poa_e80282_Figure_5_source_data_1.xlsx]

## Sheet: Luc
Figure 5- source data 1. Nuclear FOXO accumulation in LppGal4>Pect-RNAi fat.
ID	NucVol	NucMI	q97	NbSlices	FirstSlice
102521_LppGal4-LucRNAi_FOXO-488_Lamin-647_1_1_01	104.842	6164.67	9992.54	17	5
102521_LppGal4-LucRNAi_FOXO-488_Lamin-647_1_1_02	142.751	6423.86	10747	17	6
102521_LppGal4-LucRNAi_FOXO-488_Lamin-647_1_1_03	139.253	7517.17	13883.6	21	1
102521_LppGal4-LucRNAi_FOXO-488_Lamin-647_1_1_04	94.0905	7042.29	11611.2	15	21
102521_LppGal4-LucRNAi_FOXO-488_Lamin-647_1_1_05	63.7237	6837.95	14306.1	10	1
102521_LppGal4-LucRNAi_FOXO-488_Lamin-647_1_1_06	49.0415	6842.47	11565.8	10	22
102521_LppGal4-LucRNAi_FOXO-488_Lamin-647_1_1_07	41.7707	7881.23	16906.3	13	1
102521_LppGal4-LucRNAi_FOXO-488_Lamin-647_2_1_01	397.762	4273.11	7543	25	1
102521_LppGal4-LucRNAi_FOXO-488_Lamin-647_2_1_02	1.89836	1884.76	3748.06	2	59
102521_LppGal4-LucRNAi_FOXO-488_Lamin-647_2_1_03	388.83	2633.87	4503	27	8
102521_LppGal4-LucRNAi_FOXO-488_Lamin-647_2_1_04	309.707	2886.75	4710	23	25
102521_LppGal4-LucRNAi_FOXO-488_Lamin-647_2_1_05	409.348	3511.95	6000	27	20
102521_LppGal4-LucRNAi_FOXO-488_Lamin-647_2_1_06	462.307	3439.44	6009	29	31
102521_LppGal4-LucRNAi_FOXO-488_Lamin-647_2_1_07	10.9095	1014.74	2020.32	5	56
102521_LppGal4-LucRNAi_FOXO-488_Lamin-647_2_1_08	0.762089	1451.92	2267.2	1	60
102521_LppGal4-LucRNAi_FOXO-488_Lamin-647_3_1_01	11.9463	2512.13	5025.3	7	49
102521_LppGal4-LucRNAi_FOXO-488_Lamin-647_3_1_02	94.8492	11829.6	21038.8	21	2
102521_LppGal4-LucRNAi_FOXO-488_Lamin-647_3_1_03	127.842	10452.6	18152	19	1
102521_LppGal4-LucRNAi_FOXO-488_Lamin-647_3_1_04	70.4829	10805	18569.3	17	7
102521_LppGal4-LucRNAi_FOXO-488_Lamin-647_3_1_05	65.6049	6103.45	9365.17	10	23
102521_LppGal4-LucRNAi_FOXO-488_Lamin-647_3_1_06	18.9664	5300.1	7247.25	5	27
102521_LppGal4-LucRNAi_FOXO-488_Lamin-647_3_1_07	124.303	10073.2	17579.4	18	2
102521_LppGal4-LucRNAi_FOXO-488_Lamin-647_3_1_08	71.9659	10202.9	17992.3	18	5
102521_LppGal4-LucRNAi_FOXO-488_Lamin-647_3_1_09	41.6265	10272.6	15847	12	21
102521_LppGal4-LucRNAi_FOXO-488_Lamin-647_3_1_10	61.0427	10779	19117	11	6
102521_LppGal4-LucRNAi_FOXO-488_Lamin-647_3_1_11	53.1334	7285.1	12342	17	14
102521_LppGal4-LucRNAi_FOXO-488_Lamin-647_3_1_12	67.771	10671.2	18603.2	18	8
102521_LppGal4-LucRNAi_FOXO-488_Lamin-647_3_1_13	87.8325	12742.4	25484.8	17	11
102521_LppGal4-LucRNAi_FOXO-488_Lamin-647_3_1_14	61.7601	8163.6	13814.3	14	14
102521_LppGal4-LucRNAi_FOXO-488_Lamin-647_3_1_15	74.8735	6399.49	10229.5	15	17
102521_LppGal4-LucRNAi_FOXO-488_Lamin-647_3_1_16	87.1803	8642.65	15186.2	13	14
102521_LppGal4-LucRNAi_FOXO-488_Lamin-647_3_1_17	79.9095	7804.89	13344	14	13
102521_LppGal4-LucRNAi_FOXO-488_Lamin-647_3_1_18	117.087	9376.11	14858	19	11
102521_LppGal4-LucRNAi_FOXO-488_Lamin-647_4_1_01	150.753	13874.4	26461	19	1
102521_LppGal4-LucRNAi_FOXO-488_Lamin-647_4_1_02	43.2468	9395.52	14373	8	25
102521_LppGal4-LucRNAi_FOXO-488_Lamin-647_4_1_03	88.6598	7987.21	12755.7	12	23
102521_LppGal4-LucRNAi_FOXO-488_Lamin-647_4_1_04	145.113	10915.8	19596	16	10
102521_LppGal4-LucRNAi_FOXO-488_Lamin-647_4_1_05	22.7219	3925.01	7095.44	4	46
102521_LppGal4-LucRNAi_FOXO-488_Lamin-647_4_1_06	198.298	13653	26123.5	24	4
102521_LppGal4-LucRNAi_FOXO-488_Lamin-647_4_1_07	54.4242	7527.41	12410.9	9	23
102521_LppGal4-LucRNAi_FOXO-488_Lamin-647_4_1_08	129.933	12410.3	20002	21	14
102521_LppGal4-LucRNAi_FOXO-488_Lamin-647_4_1_09	68.6635	7983.47	12916.4	11	30
102521_LppGal4-LucRNAi_FOXO-488_Lamin-647_4_1_10	146.973	9130.56	15257	20	11
102521_LppGal4-LucRNAi_FOXO-488_Lamin-647_4_1_11	94.5574	12046.1	22060.4	20	8
102521_LppGal4-LucRNAi_FOXO-488_Lamin-647_4_1_12	90.1325	8458.42	14996.8	18	18
102521_LppGal4-LucRNAi_FOXO-488_Lamin-647_4_1_13	93.7713	7537.77	11489.1	14	25
102521_LppGal4-LucRNAi_FOXO-488_Lamin-647_5_1_01	7.83029	4452.24	6568.49	4	29
102521_LppGal4-LucRNAi_FOXO-488_Lamin-647_5_1_02	48.8595	8135.98	13018	14	16
102521_LppGal4-LucRNAi_FOXO-488_Lamin-647_5_1_03	37.3973	5892.3	9659.68	6	22
102521_LppGal4-LucRNAi_FOXO-488_Lamin-647_5_1_04	78.4986	8972.7	14624	9	15
102521_LppGal4-LucRNAi_FOXO-488_Lamin-647_5_1_05	93.4005	13379.4	24368.8	14	2
102521_LppGal4-LucRNAi_FOXO-488_Lamin-647_5_1_06	105.584	10370.7	18152.4	16	6
102521_LppGal4-LucRNAi_FOXO-488_Lamin-647_5_1_07	76.2158	7421.16	12229.4	13	16
102521_LppGal4-LucRNAi_FOXO-488_Lamin-647_5_1_08	31.2766	5903.43	8671	7	24
102521_LppGal4-LucRNAi_FOXO-488_Lamin-647_5_1_09	97.0497	11488.7	20915.5	15	1
102521_LppGal4-LucRNAi_FOXO-488_Lamin-647_5_1_10	55.1485	10205.8	16117.6	11	19
102521_LppGal4-LucRNAi_FOXO-488_Lamin-647_5_1_11	107.853	10844.2	20176	19	11
102521_LppGal4-LucRNAi_FOXO-488_Lamin-647_5_1_12	79.8855	5046.42	7693	14	17
102521_LppGal4-LucRNAi_FOXO-488_Lamin-647_5_1_13	7.44238	4627.93	7084.46	1	30
102521_LppGal4-LucRNAi_FOXO-488_Lamin-647_5_1_14	63.1916	4989.12	10819.8	20	22
102521_LppGal4-LucRNAi_FOXO-488_Lamin-647_5_1_15	15.4581	6793.73	9817.41	2	31
102521_LppGal4-LucRNAi_FOXO-488_Lamin-647_5_1_16	102.992	11476.1	19766.4	15	14
102521_LppGal4-LucRNAi_FOXO-488_Lamin-647_5_1_17	17.3049	4585.64	7901.05	11	30
102521_LppGal4-LucRNAi_FOXO-488_Lamin-647_5_1_18	118.278	12666.7	23999.4	13	12
102521_LppGal4-LucRNAi_FOXO-488_Lamin-647_6_1_01	38.8597	3115.71	5993	16	55
102521_LppGal4-LucRNAi_FOXO-488_Lamin-647_6_1_02	18.7089	7569.31	11974	8	44
102521_LppGal4-LucRNAi_FOXO-488_Lamin-647_6_1_03	55.6943	4048.37	7603.56	18	35
102521_LppGal4-LucRNAi_FOXO-488_Lamin-647_6_1_04	48.5265	8474.69	16088	15	25
102521_LppGal4-LucRNAi_FOXO-488_Lamin-647_6_1_05	157.639	9163.58	16357	21	22
102521_LppGal4-LucRNAi_FOXO-488_Lamin-647_6_1_06	58.571	7955.29	14382.3	17	15
102521_LppGal4-LucRNAi_FOXO-488_Lamin-647_6_1_07	37.9328	7505.44	11671	17	27
102521_LppGal4-LucRNAi_FOXO-488_Lamin-647_6_1_08	55.9895	6871.82	12268.6	7	33
102521_LppGal4-LucRNAi_FOXO-488_Lamin-647_6_1_09	20.724	4596.17	7116.73	10	31
102521_LppGal4-LucRNAi_FOXO-488_Lamin-647_6_1_10	112.068	6782.35	12537.1	28	5
102521_LppGal4-LucRNAi_FOXO-488_Lamin-647_6_1_11	77.6816	6909.47	11848.6	16	22
102521_LppGal4-LucRNAi_FOXO-488_Lamin-647_6_1_12	61.5679	3755.7	7180.45	16	25
102521_LppGal4-LucRNAi_FOXO-488_Lamin-647_6_1_13	31.3521	6565.91	10780	8	56
102521_LppGal4-LucRNAi_FOXO-488_Lamin-647_6_1_14	13.4018	5157.64	8094.14	4	45
102521_LppGal4-LucRNAi_FOXO-488_Lamin-647_6_1_15	45.4027	5045.87	8231.32	6	54
102521_LppGal4-LucRNAi_FOXO-488_Lamin-647_6_1_16	62.5703	11643.1	21640.5	16	21
102521_LppGal4-LucRNAi_FOXO-488_Lamin-647_6_1_17	51.0359	4969.33	8913.49	18	18
102521_LppGal4-LucRNAi_FOXO-488_Lamin-647_6_1_18	54.6095	4079.44	8132.52	18	36
102521_LppGal4-LucRNAi_FOXO-488_Lamin-647_6_1_19	24.9945	3034.95	5140.63	11	41
102521_LppGal4-LucRNAi_FOXO-488_Lamin-647_6_1_20	40.2362	9411.58	15585.9	10	38
102521_LppGal4-LucRNAi_FOXO-488_Lamin-647_6_1_21	77.7228	5776.2	11752.3	20	19
102521_LppGal4-LucRNAi_FOXO-488_Lamin-647_6_1_22	13.8652	1484.51	3063.97	8	72
102521_LppGal4-LucRNAi_FOXO-488_Lamin-647_6_1_23	43.5421	5343.36	8462	10	24
102521_LppGal4-LucRNAi_FOXO-488_Lamin-647_6_1_24	28.2385	5301.31	9195.88	8	32
102521_LppGal4-LucRNAi_FOXO-488_Lamin-647_6_1_25	9.78701	1314.25	2480	9	73
102521_LppGal4-LucRNAi_FOXO-488_Lamin-647_6_1_26	14.9981	1248.62	2380.29	3	69
102521_LppGal4-LucRNAi_FOXO-488_Lamin-647_6_1_27	87.9595	7619.04	14355.8	21	5
102521_LppGal4-LucRNAi_FOXO-488_Lamin-647_6_1_28	57.754	3488.87	7680.34	19	19
102521_LppGal4-LucRNAi_FOXO-488_Lamin-647_6_1_29	5.36209	3022.47	4888.68	2	56
102521_LppGal4-LucRNAi_FOXO-488_Lamin-647_6_1_30	14.1364	2076.79	3980.64	10	72
102521_LppGal4-LucRNAi_FOXO-488_Lamin-647_6_1_31	9.49865	1349.16	2732.47	6	65
102521_LppGal4-LucRNAi_FOXO-488_Lamin-647_6_1_32	82.8961	8906.89	17272.1	18	1
102521_LppGal4-LucRNAi_FOXO-488_Lamin-647_7_1_01	13.2542	5331.88	7844.35	4	48
102521_LppGal4-LucRNAi_FOXO-488_Lamin-647_7_1_02	68.7871	11052.2	18416.4	15	19
102521_LppGal4-LucRNAi_FOXO-488_Lamin-647_7_1_03	125.295	14828.8	25715.1	18	7
102521_LppGal4-LucRNAi_FOXO-488_Lamin-647_7_1_04	93.9532	12122.8	21509.4	15	10
102521_LppGal4-LucRNAi_FOXO-488_Lamin-647_7_1_05	88.3783	19034.7	35391.1	15	4
102521_LppGal4-LucRNAi_FOXO-488_Lamin-647_7_1_06	87.9252	11560.9	18911.1	17	9
102521_LppGal4-LucRNAi_FOXO-488_Lamin-647_7_1_07	71.0185	14094.5	24433.2	16	11
102521_LppGal4-LucRNAi_FOXO-488_Lamin-647_7_1_08	71.3137	13685.1	24957.2	13	15
102521_LppGal4-LucRNAi_FOXO-488_Lamin-647_7_1_09	81.7838	12089.6	19686.3	17	13
102521_LppGal4-LucRNAi_FOXO-488_Lamin-647_7_1_10	48.0494	7477.81	10849	9	31
102521_LppGal4-LucRNAi_FOXO-488_Lamin-647_7_1_11	62.7694	13704.4	22620.6	14	13
102521_LppGal4-LucRNAi_FOXO-488_Lamin-647_7_1_12	60.0162	8325.61	13451	13	19
102521_LppGal4-LucRNAi_FOXO-488_Lamin-647_7_1_13	49.9409	8273.85	12927.1	14	35
102521_LppGal4-LucRNAi_FOXO-488_Lamin-647_7_1_14	95.0002	21438.4	40020.5	17	1
102521_LppGal4-LucRNAi_FOXO-488_Lamin-647_7_1_15	83.4797	21568.4	38974.8	18	2
102521_LppGal4-LucRNAi_FOXO-488_Lamin-647_7_1_16	32.0215	7630.71	10847.3	9	30
102521_LppGal4-LucRNAi_FOXO-488_Lamin-647_7_1_17	3.86194	4026.3	6071.25	1	38
102521_LppGal4-LucRNAi_FOXO-488_Lamin-647_7_1_18	7.45955	6126.16	8794.17	2	37
102521_LppGal4-LucRNAi_FOXO-488_Lamin-647_7_1_19	42.447	4433.63	6303	8	54
102521_LppGal4-LucRNAi_FOXO-488_Lamin-647_7_1_20	0.889104	9032.31	12599	1	26

## Sheet: PECT
ID	NucVol	NucMI	q97	NbSlices	FirstSlice
102521_LppGal4-PECTRNAi_FOXO-488_Lamin-647_1_1_01	114.193	3682.21	7943	17	1
102521_LppGal4-PECTRNAi_FOXO-488_Lamin-647_1_1_02	166.135	4865.21	8204.62	22	9
102521_LppGal4-PECTRNAi_FOXO-488_Lamin-647_1_1_03	111.646	3624.03	5789	15	26
102521_LppGal4-PECTRNAi_FOXO-488_Lamin-647_1_1_04	1.74388	3000.88	4861.42	1	44
102521_LppGal4-PECTRNAi_FOXO-488_Lamin-647_1_1_05	156.884	3468.62	5524.47	20	4
102521_LppGal4-PECTRNAi_FOXO-488_Lamin-647_1_1_06	62.021	2605.06	4067	11	8
102521_LppGal4-PECTRNAi_FOXO-488_Lamin-647_1_1_07	167.804	4236.51	7550.04	20	1
102521_LppGal4-PECTRNAi_FOXO-488_Lamin-647_1_1_08	93.7885	3459.73	5178.87	14	17
102521_LppGal4-PECTRNAi_FOXO-488_Lamin-647_1_1_09	6.94119	3136.56	6800.48	3	1
102521_LppGal4-PECTRNAi_FOXO-488_Lamin-647_1_1_10	124.529	4204.58	7190.22	21	9
102521_LppGal4-PECTRNAi_FOXO-488_Lamin-647_1_1_11	0.981791	2461.86	4119.44	1	32
102521_LppGal4-PECTRNAi_FOXO-488_Lamin-647_2_1_01	104.911	12724	21953	18	13
102521_LppGal4-PECTRNAi_FOXO-488_Lamin-647_2_1_02	118.065	18462.2	31736	20	1
102521_LppGal4-PECTRNAi_FOXO-488_Lamin-647_2_1_03	85.814	9841.9	17037.1	15	28
102521_LppGal4-PECTRNAi_FOXO-488_Lamin-647_2_1_04	37.6445	7853.96	15939.6	9	1
102521_LppGal4-PECTRNAi_FOXO-488_Lamin-647_2_1_05	98.1756	15994.8	27379.1	22	7
102521_LppGal4-PECTRNAi_FOXO-488_Lamin-647_2_1_06	74.8495	10299	16265.1	14	19
102521_LppGal4-PECTRNAi_FOXO-488_Lamin-647_2_1_07	101.543	10189.3	15439	20	12
102521_LppGal4-PECTRNAi_FOXO-488_Lamin-647_2_1_08	31.0294	8681.07	14304	6	9
102521_LppGal4-PECTRNAi_FOXO-488_Lamin-647_2_1_09	119.38	14905.2	26346.4	18	12
102521_LppGal4-PECTRNAi_FOXO-488_Lamin-647_2_1_10	37.5998	7694.73	11427.5	5	25
102521_LppGal4-PECTRNAi_FOXO-488_Lamin-647_3_1_01	45.7974	6796.48	10366.9	9	30
102521_LppGal4-PECTRNAi_FOXO-488_Lamin-647_3_1_02	83.0197	10753.2	17888	19	13
102521_LppGal4-PECTRNAi_FOXO-488_Lamin-647_3_1_03	111.862	8996.17	14762.8	14	11
102521_LppGal4-PECTRNAi_FOXO-488_Lamin-647_3_1_04	120.702	10743.2	19416.3	19	8
102521_LppGal4-PECTRNAi_FOXO-488_Lamin-647_3_1_05	60.5827	9446.52	15788.3	14	8
102521_LppGal4-PECTRNAi_FOXO-488_Lamin-647_3_1_06	74.1835	9768.93	17135	17	16
102521_LppGal4-PECTRNAi_FOXO-488_Lamin-647_3_1_07	112.226	11787.3	19539.7	17	1
102521_LppGal4-PECTRNAi_FOXO-488_Lamin-647_3_1_08	65.1998	9728.49	17267.1	13	5
102521_LppGal4-PECTRNAi_FOXO-488_Lamin-647_3_1_09	104.77	8208.24	14342.8	17	18
102521_LppGal4-PECTRNAi_FOXO-488_Lamin-647_3_1_10	39.0759	7161.45	11780.1	8	39
102521_LppGal4-PECTRNAi_FOXO-488_Lamin-647_3_1_11	81.928	6361.55	11297	11	15
102521_LppGal4-PECTRNAi_FOXO-488_Lamin-647_3_1_12	71.99	8216.74	12864.4	18	23
102521_LppGal4-PECTRNAi_FOXO-488_Lamin-647_3_1_13	70.8297	8599.9	14607.5	18	5
102521_LppGal4-PECTRNAi_FOXO-488_Lamin-647_4_1_01	22.3966	2627.48	4743.42	7	42
102521_LppGal4-PECTRNAi_FOXO-488_Lamin-647_4_1_02	113.992	12109.2	24233	18	8
102521_LppGal4-PECTRNAi_FOXO-488_Lamin-647_4_1_03	20.8359	4037.63	7016.41	14	35
102521_LppGal4-PECTRNAi_FOXO-488_Lamin-647_4_1_04	53.8006	4810.75	10367.9	14	1
102521_LppGal4-PECTRNAi_FOXO-488_Lamin-647_4_1_05	64.7499	10197	17946.7	7	23
102521_LppGal4-PECTRNAi_FOXO-488_Lamin-647_4_1_06	115.214	22496.4	43188.6	12	4
102521_LppGal4-PECTRNAi_FOXO-488_Lamin-647_4_1_07	112.389	15002	26824.4	15	8
102521_LppGal4-PECTRNAi_FOXO-488_Lamin-647_4_1_08	58.4366	15050.5	25455	12	15
102521_LppGal4-PECTRNAi_FOXO-488_Lamin-647_4_1_09	11.7968	3066.95	5021.27	8	30
102521_LppGal4-PECTRNAi_FOXO-488_Lamin-647_4_1_10	26.549	4526.71	9692.93	8	30
102521_LppGal4-PECTRNAi_FOXO-488_Lamin-647_4_1_11	112.054	20769.6	39565.8	13	1
102521_LppGal4-PECTRNAi_FOXO-488_Lamin-647_4_1_12	32.3149	13247.3	24419.6	5	41
102521_LppGal4-PECTRNAi_FOXO-488_Lamin-647_4_1_13	0.861543	6275.68	12889.2	1	45
102521_LppGal4-PECTRNAi_FOXO-488_Lamin-647_4_1_14	37.3535	16464.8	27847.8	15	23
102521_LppGal4-PECTRNAi_FOXO-488_Lamin-647_4_1_15	36.8557	9115.3	15507.7	11	1
102521_LppGal4-PECTRNAi_FOXO-488_Lamin-647_4_1_16	16.8248	15845.4	28726.2	5	1
102521_LppGal4-PECTRNAi_FOXO-488_Lamin-647_5_1_01	10.5009	7290.62	11023.8	3	11
102521_LppGal4-PECTRNAi_FOXO-488_Lamin-647_5_1_02	23.9679	9017.11	14251.4	4	20
102521_LppGal4-PECTRNAi_FOXO-488_Lamin-647_5_1_03	53.5499	7544.22	12704.5	9	39
102521_LppGal4-PECTRNAi_FOXO-488_Lamin-647_5_1_04	77.4224	11791.6	19870.7	14	15
102521_LppGal4-PECTRNAi_FOXO-488_Lamin-647_5_1_05	108.77	13724.6	25579.7	14	3
102521_LppGal4-PECTRNAi_FOXO-488_Lamin-647_5_1_06	27.3822	6076.8	10967.4	8	37
102521_LppGal4-PECTRNAi_FOXO-488_Lamin-647_5_1_07	100.995	14642.5	27521	19	7
102521_LppGal4-PECTRNAi_FOXO-488_Lamin-647_5_1_08	78.5099	16072.5	32358.9	15	1
102521_LppGal4-PECTRNAi_FOXO-488_Lamin-647_5_1_09	17.1073	8296.72	15099.1	5	3
102521_LppGal4-PECTRNAi_FOXO-488_Lamin-647_5_1_10	60.707	9398.51	15585.8	16	16
102521_LppGal4-PECTRNAi_FOXO-488_Lamin-647_5_1_11	79.7704	8906.45	15404.2	14	16
102521_LppGal4-PECTRNAi_FOXO-488_Lamin-647_5_1_12	80.6108	10295	16227	14	13
102521_LppGal4-PECTRNAi_FOXO-488_Lamin-647_5_1_13	45.4605	6994.74	11151.2	10	25
102521_LppGal4-PECTRNAi_FOXO-488_Lamin-647_5_1_14	100.349	15861.2	29233.9	18	1
102521_LppGal4-PECTRNAi_FOXO-488_Lamin-647_5_1_15	97.9688	20472.7	39081.5	15	1
102521_LppGal4-PECTRNAi_FOXO-488_Lamin-647_5_1_16	0.716776	3134.64	6949.5	1	23
102521_LppGal4-PECTRNAi_FOXO-488_Lamin-647_5_1_17	69.8027	8394.09	13869.9	12	20
102521_LppGal4-PECTRNAi_FOXO-488_Lamin-647_5_1_18	41.0292	10124.9	17060.9	9	30
102521_LppGal4-PECTRNAi_FOXO-488_Lamin-647_5_1_19	46.9824	10616.2	17202.3	13	19
102521_LppGal4-PECTRNAi_FOXO-488_Lamin-647_5_1_20	23.7631	5643.28	10846	10	9
102521_LppGal4-PECTRNAi_FOXO-488_Lamin-647_5_1_21	13.6187	10029.9	17582.3	4	3
102521_LppGal4-PECTRNAi_FOXO-488_Lamin-647_5_1_22	9.02855	7709.83	11584.5	4	33
102521_LppGal4-PECTRNAi_FOXO-488_Lamin-647_6_1_01	103.442	9797.65	19519.6	20	10
102521_LppGal4-PECTRNAi_FOXO-488_Lamin-647_6_1_02	155.42	9346.25	18913	19	1
102521_LppGal4-PECTRNAi_FOXO-488_Lamin-647_6_1_03	108.244	5944.74	10230.6	11	12
102521_LppGal4-PECTRNAi_FOXO-488_Lamin-647_6_1_04	134.274	8596.95	16471	18	9
102521_LppGal4-PECTRNAi_FOXO-488_Lamin-647_6_1_05	141.463	11477.3	20457.6	16	4
102521_LppGal4-PECTRNAi_FOXO-488_Lamin-647_6_1_06	8.63662	4506.59	7610.64	1	30
102521_LppGal4-PECTRNAi_FOXO-488_Lamin-647_6_1_07	39.7122	4795.39	7910.09	8	18
102521_LppGal4-PECTRNAi_FOXO-488_Lamin-647_6_1_08	153.81	7817.12	13681.7	18	3
102521_LppGal4-PECTRNAi_FOXO-488_Lamin-647_6_1_09	1.11577	4469.05	6205.24	1	14
102521_LppGal4-PECTRNAi_FOXO-488_Lamin-647_7_1_01	4.49485	5570.4	8575.31	3	19
102521_LppGal4-PECTRNAi_FOXO-488_Lamin-647_7_1_02	50.5203	7564.96	12230.1	11	24
102521_LppGal4-PECTRNAi_FOXO-488_Lamin-647_7_1_03	82.1856	15183.8	27093.4	15	1
102521_LppGal4-PECTRNAi_FOXO-488_Lamin-647_7_1_04	101.189	13220.9	23691	14	5
102521_LppGal4-PECTRNAi_FOXO-488_Lamin-647_7_1_05	55.8979	7320.69	12135.6	10	16
102521_LppGal4-PECTRNAi_FOXO-488_Lamin-647_7_1_06	81.9984	10810.2	18963.8	17	8
102521_LppGal4-PECTRNAi_FOXO-488_Lamin-647_7_1_07	3.0719	4221.16	6323	1	33
102521_LppGal4-PECTRNAi_FOXO-488_Lamin-647_7_1_08	34.5288	6201.79	9543.26	10	34
102521_LppGal4-PECTRNAi_FOXO-488_Lamin-647_7_1_09	105.168	11988.3	21869	15	3
102521_LppGal4-PECTRNAi_FOXO-488_Lamin-647_7_1_10	70.2158	11368.4	20421.9	13	3
102521_LppGal4-PECTRNAi_FOXO-488_Lamin-647_7_1_11	91.3271	12916.6	21939.5	16	6
102521_LppGal4-PECTRNAi_FOXO-488_Lamin-647_7_1_12	59.8208	7986.9	12870	13	21
102521_LppGal4-PECTRNAi_FOXO-488_Lamin-647_7_1_13	95.4512	12692.7	22498.1	17	6
