# Supplementary material for: Fat body phospholipid state dictates hunger-driven feeding behavior
Source: eLife journal article supplement (doi:10.7554/elife.80282), 2022-10-06
Supplement: supp [file elife-80282-supp-v1.zip › elife_poa_e80282_Figure_6_figure_supplement_1_source_data_1.xlsx]

## Sheet: Sheet1
A. Pect Expression in RNAi and OE lines
Gene	Genotype	Replicate	Cq
Robl	Luc	1	22.05
Robl	Luc	2	21.34
Robl	Luc	3	21.55
PECT	Luc	1	23.02
PECT	Luc	2	22.13
PECT	Luc	3	22.51
Robl	Luc-RNAi	1	25.13
Robl	Luc-RNAi	2	25.22
Robl	Luc-RNAi	3	24.16
PECT	Luc-RNAi	1	23.05
PECT	Luc-RNAi	2	21.77
PECT	Luc-RNAi	3	21.67
Robl	UAS-PECT	1	23.97
Robl	UAS-PECT	2	22.53
Robl	UAS-PECT	3	22.14
PECT	UAS-PECT	1	21.01
PECT	UAS-PECT	2	20.41
PECT	UAS-PECT	3	20.83
Robl	PECT-RNAi	1	23.51
Robl	PECT-RNAi	2	23.07
Robl	PECT-RNAi	3	23.73
PECT	PECT-RNAi	1	22.83
PECT	PECT-RNAi	2	23.11
PECT	PECT-RNAi	3	22.33
