# Supplementary material for: Fat body phospholipid state dictates hunger-driven feeding behavior
Source: eLife journal article supplement (doi:10.7554/elife.80282), 2022-10-06
Supplement: supp [file elife-80282-supp-v1.zip › elife_poa_e80282_Figure_6_figure_supplement_1_source_data_2.xlsx]

## Sheet: Sheet1
B. Pect Expression in w1118 over time
Sample	Cq
Robl_7_nf_1	24.0321
Robl_7_nf_2	24.0043
Robl_7_nf_3	23.7491
Robl_14_nf_1	23.9919
Robl_14_nf_2	23.6819
Robl_14_nf_3	24.2255
Robl_21_nf_1	22.779
Robl_21_nf_2	23.1163
Robl_21_nf_3	23.1193
PECT_7_nf_1	30.4023
PECT_7_nf_2	35.2008
PECT_7_nf_3	32.8
PECT_14_nf_1	34.51
PECT_14_nf_2	34.51
PECT_14_nf_3	34.51
PECT_21_nf_1	32.5222
PECT_21_nf_2	32.5222
PECT_21_nf_3	32.5222
Robl_14_hsd_1	23.1854
Robl_14_hsd_2	22.3527
Robl_14_hsd_3	22.6489
Robl_21_hsd_1	24.1013
Robl_21_hsd_2	23.8101
Robl_21_hsd_3	24.0814
PECT_14_hsd_1	25.1672
PECT_14_hsd_2	24.4322
PECT_14_hsd_3	26.8321
PECT_21_hsd_1	33.3983
PECT_21_hsd_2	35.9297
PECT_21_hsd_3	34.1308
Robl_7_hsd_1	26.0541
Robl_7_hsd_2	26.151
Robl_7_hsd_3	26.2169
PECT_7_hsd_1	26.1206
PECT_7_hsd_2	26.2208
PECT_7_hsd_3	26.256
