# Supplementary material for: Fat body phospholipid state dictates hunger-driven feeding behavior
Source: eLife journal article supplement (doi:10.7554/elife.80282), 2022-10-06
Supplement: supp [file elife-80282-supp-v1.zip › elife_poa_e80282_Figure_6_source_data_1.xlsx]

## Sheet: Key-to-Lipidomics-Data
	Lipids data is provided in six different worksheets. The details of the data in each sheet is as follows:
	Sheet 1 Lipid Species Concentrations
		This sheet provides comprehensive list of various lipids from 13 different lipid classes and their absolute concentrations. The concentrations are expressed in nmol/g of plasma (µM)*
		Note: Each of your samples was added with a set of representative isotope labeled lipids for each class to obtain the absolute concentrations.
													*for tissue samples, multiply by 25 and divide by mg of sample
		The names of the 13 Lipid classes are:				Abbreviation	Lipid class
					1	CE	Cholesterol Ester											Disambiguation
					2	CER	Ceramides											Prepared Blank_Batch#1	Negative Control				7 day old Flies
					3	DAG	Diacylglycerol											QC-06700	Quality Control				All flies treated on Normal Diet conditions
					4	DCER	Dihydroceramides											KK3018_6	LG4>Luc-OE				Each sample contains 10 flies
					5	FFA	Free fatty Acids											KK3018_19	LG4>Pect-OE
					6	HCER	Hexosylceramides											KK3018_1	LG4>Pect-RNAi
					7	LCER	Lactosylceramide											KK3018_20	LG4>Luc-OE
					8	LPC	Lysophosphatidylcholine											KK3018_15	LG4>Luc-OE
					9	LPE	Lysophosphatidylethanolamine											KK3018_14	LG4>Pect-OE
					10	PC	Phosphatidylcholine											KK3018_7	LG4>Pect-RNAi
					11	PE	Phosphatidylethanolamine											KK3018_2	LG4>Pect-OE
					12	SM	Sphingomyelin											KK3018_10	LG4>Luc-RNAi
					13	TAG	Triacylglycerol											KK3018_13	LG4>Luc-RNAi
																		KK3018_8	LG4>Luc-RNAi
																		KK3018_16	LG4>Pect-OE
	Sheet 2 Lipid Species Composition																	KK3018_12	LG4>Luc-OE
		In this sheet, each lipid in sheet 1 is expressed in % composition and is calculated as follows:																KK3018_4	LG4>Pect-RNAi
			Composition (%)	=	(lipid concentration /sum of all lipids concentration from that class)*100													KK3018_17	LG4>Pect-OE
																		KK3018_11	LG4>Luc-RNAi
																		KK3018_9	LG4>Luc-RNAi
	Sheet 3 Lipid Class Concentration																	KK3018_5	LG4>Pect-RNAi
		This sheet provides total concentration for each of the 13 lipid classes. These are obtained by summing up individual lipid concentrations for the respective class in sheet 1.																KK3018_3	LG4>Luc-RNAi
																		KK3018_18	LG4>Luc-OE
																		QC-06701	Quality Control
	Sheet 4 Lipid Class Composition
		This sheet shows % composition for each of the 13 lipid classes.
		Note: Sum of % composition of all 13 lipid classes is 100.
	Sheet 5 Fatty Acid Concentration
		This sheet sums the concentrations for all fatty acids that are the same in one lipid class.
		For example: PC(FA18:1) is the sum of the concentrations of PC(12:0/18:1), PC(14:0/18:1), PC(15:0/18:1), etc for all PC(x/18:1)
	Sheet 6 Fatty Acid Composition
		In this sheet, each fatty acid in sheet 5 is expressed in % composition and is calculated as follows
			Composition (%)	=	(fatty acid concentration /sum of all fatty acids concentration from that class)*100

## Sheet: Lipid Species Concentrations
Sample ID	# of Measured Lipid Species	CE(12:0)	CE(14:0)	CE(14:1)	CE(15:0)	CE(16:0)	CE(16:1)	CE(17:0)	CE(18:0)	CE(18:1)	CE(18:2)	CE(18:3)	CE(18:4)	CE(20:0)	CE(20:1)	CE(20:2)	CE(20:3)	CE(20:4)	CE(20:5)	CE(22:0)	CE(22:1)	CE(22:2)	CE(22:4)	CE(22:5)	CE(22:6)	CE(24:0)	CE(24:1)	CER(14:0)	CER(16:0)	CER(18:0)	CER(18:1)	CER(20:0)	CER(20:1)	CER(22:0)	CER(22:1)	CER(24:0)	CER(24:1)	CER(26:0)	CER(26:1)	DAG(12:0/16:0)	DAG(12:0/18:0)	DAG(12:0/18:1)	DAG(12:0/18:2)	DAG(14:0/14:0)	DAG(14:0/16:0)	DAG(14:0/16:1)	DAG(14:0/18:1)	DAG(14:0/18:2)	DAG(14:0/18:3)
Prepared Blank_Batch#1	101	.	.	.	.	.	.	.	.	0.0471	0.0975	.	.	.	.	.	.	.	.	.	.	.	.	.	.	.	.	0.0339	.	.	.	.	.	.	.	.	.	.	.	.	.	.	.	0.0283	.	.	.	.	.
QC-06700	686	0.7884	17.2635	1.1866	5.0618	247.293	71.6352	5.1508	25.2241	438.091	1365.94	51.8566	1.2944	59.5976	8.4514	1.6383	21.7473	170.751	16.4166	0.566	3.0173	17.5539	0.779	2.4378	15.9541	3.7276	0.976	.	0.2429	.	.	0.0924	.	0.7366	.	2.6626	0.8698	.	.	.	.	.	.	.	0.4392	.	0.5729	0.4251	.
KK3018_6	404	.	.	.	.	.	0.525	.	.	.	0.64	.	.	.	.	.	.	.	.	.	.	.	.	.	.	.	.	.	.	.	.	.	.	.	.	.	.	.	.	1.3929	.	3.0623	1.9615	13.6896	3.8288	31.343	7.4861	2.4812	.
KK3018_19	428	.	.	.	.	.	0.56	.	.	0.3284	0.2604	.	.	.	.	.	.	.	.	.	.	.	.	.	.	.	.	.	.	.	.	.	.	.	.	.	.	.	.	0.9692	.	2.3962	0.8135	10.431	2.349	25.2566	5.2075	0.8961	.
KK3018_1	396	.	.	.	.	.	.	.	.	0.5883	.	.	.	.	.	.	.	.	.	.	.	.	.	.	.	.	.	.	.	.	.	.	.	.	.	.	.	.	.	1.839	.	4.1123	1.8169	12.9593	3.9982	31.6211	8.6947	2.7399	.
KK3018_20	381	.	1.1315	.	.	.	1.1612	.	.	.	.	.	.	.	.	.	.	.	.	.	.	.	.	.	.	.	.	.	.	.	.	.	.	.	.	.	.	.	.	2.2355	.	4.0604	1.7907	12.9124	3.4398	35.1321	8.7472	1.6455	.
KK3018_15	425	.	0.3349	.	.	.	0.5277	.	.	0.4241	.	.	.	.	.	.	.	.	.	.	.	.	.	.	.	.	.	.	.	.	.	.	.	.	.	.	.	.	.	0.9443	.	2.6947	1.033	6.5174	1.9928	19.3296	5.5676	1.0565	.
KK3018_14	425	.	0.4734	.	.	.	0.6633	.	.	0.4492	0.2094	.	.	.	.	.	.	.	.	.	.	.	.	.	.	.	.	.	.	.	.	.	.	.	.	.	.	.	.	1.2589	0.3157	2.4493	1.3473	9.393	3.2775	19.9659	4.7886	1.5575	.
KK3018_7	417	.	0.4812	.	.	.	0.4351	.	.	.	.	.	.	.	.	.	.	.	.	.	.	.	.	.	.	.	.	.	.	.	.	.	.	.	.	.	.	.	.	1.3789	.	1.6724	1.1162	9.0753	2.7822	14.2443	3.6308	1.2017	.
KK3018_2	392	.	.	.	.	.	0.9103	.	.	.	.	.	.	.	.	.	.	.	.	.	.	.	.	.	.	.	.	.	.	.	.	.	.	.	.	.	.	.	.	1.566	.	5.9606	.	14.283	4.347	61.1493	15.9887	.	.
KK3018_10	412	.	.	.	.	1.0925	2.0579	.	.	2.2915	3.1569	.	.	.	.	.	.	.	.	.	.	.	.	.	.	.	.	.	.	.	.	.	.	.	.	.	.	.	.	.	.	4.6184	1.5043	.	.	48.1986	13.583	3.3686	.
KK3018_13	392	.	.	.	.	.	0.6543	.	.	.	.	.	.	.	.	.	.	.	.	.	.	.	.	.	.	.	.	.	.	.	.	.	.	.	.	.	.	.	.	2.1957	.	5.2083	1.824	14.1009	5.531	56.6836	14.1662	3.2062	.
KK3018_8	414	.	0.4893	.	.	.	0.7951	.	.	0.5175	.	.	.	.	.	.	.	.	.	.	.	.	.	.	.	.	.	.	.	.	.	.	.	.	.	.	.	.	.	1.3136	.	2.316	0.99	7.6545	2.55	22.4575	5.3436	1.0687	.
KK3018_16	379	.	.	.	.	.	1.9392	.	.	.	.	.	.	.	.	.	.	.	.	.	.	.	.	.	.	.	.	.	.	.	.	.	.	.	.	.	.	.	.	.	.	6.9563	.	.	.	70.7151	17.9889	.	.
KK3018_12	434	.	.	.	.	.	0.3913	.	.	0.2745	.	.	.	.	.	.	.	.	.	.	.	.	.	.	.	.	.	.	.	.	.	.	.	.	.	.	.	.	.	1.5084	.	1.596	0.8152	14.7841	4.3509	17.5145	4.3078	1.1623	.
KK3018_4	412	.	0.7041	.	.	.	0.5038	.	.	.	.	.	.	.	.	.	.	.	.	.	.	.	.	.	.	.	.	.	.	.	.	.	.	.	.	.	.	.	.	1.6931	0.4442	2.9206	1.6	13.4334	3.9834	25.3397	5.9873	1.725	.
KK3018_17	428	.	0.506	.	.	.	0.4495	.	.	0.3032	.	.	.	.	.	.	.	.	.	.	.	.	.	.	.	.	.	.	.	.	.	.	.	.	.	.	.	.	.	0.8916	.	1.6699	1.2347	7.0976	2.1258	18.1205	3.6996	1.194	.
KK3018_11	410	.	.	.	.	0.7793	0.5856	.	.	2.1026	4.1238	.	.	.	.	.	.	0.9254	.	.	.	.	.	.	.	.	.	.	.	.	.	.	.	.	.	.	.	.	.	1.5882	.	3.198	1.7768	10.3946	3.6505	28.8725	7.3818	3.044	.
KK3018_9	405	.	.	.	.	.	0.3744	.	.	.	.	.	.	.	.	.	.	.	.	.	.	.	.	.	.	.	.	.	.	.	.	.	.	.	.	.	.	.	.	1.1187	.	2.4733	1.4549	9.3879	2.8065	24.0667	6.5	1.502	.
KK3018_5	413	0.3386	0.6281	.	.	.	0.5779	.	.	0.3348	.	.	.	.	.	.	.	.	.	.	.	.	.	.	.	.	.	.	.	.	.	.	.	.	.	.	.	.	.	0.8604	.	2.278	1.425	6.5455	1.8326	21.0878	4.0488	1.2238	.
KK3018_3	406	.	.	.	.	.	0.5436	.	.	0.5429	.	.	.	.	.	.	.	.	.	.	.	.	.	.	.	.	.	.	.	.	.	.	.	.	.	.	.	.	.	0.9124	0.6909	2.9508	1.5688	7.4459	2.5091	26.1902	7.2787	1.9355	.
KK3018_18	381	.	.	.	.	.	1.3071	.	.	.	.	.	.	.	.	.	.	.	.	.	.	.	.	.	.	.	.	.	.	.	.	.	.	.	.	.	.	.	.	2.7075	.	7.5009	.	21.0662	6.9231	88.5235	19.5617	.	.
QC-06701	671	0.7096	19.0655	1.231	5.691	263.684	71.244	5.2069	26.5282	450.557	1423.14	53.907	1.4458	63.4232	9.4713	1.9469	22.4623	172.547	16.9591	0.6266	3.1251	19.2949	0.954	2.5284	16.1109	3.7971	1.1656	.	0.2929	.	.	.	.	0.8458	.	3.008	0.9044	.	.	.	.	.	.	.	0.3671	.	0.4881	0.4737	.
[truncated: 1,022 more columns]

## Sheet: Lipid Species Composition
Sample ID	CE(12:0)	CE(14:0)	CE(14:1)	CE(15:0)	CE(16:0)	CE(16:1)	CE(17:0)	CE(18:0)	CE(18:1)	CE(18:2)	CE(18:3)	CE(18:4)	CE(20:0)	CE(20:1)	CE(20:2)	CE(20:3)	CE(20:4)	CE(20:5)	CE(22:0)	CE(22:1)	CE(22:2)	CE(22:4)	CE(22:5)	CE(22:6)	CE(24:0)	CE(24:1)	CER(14:0)	CER(16:0)	CER(18:0)	CER(18:1)	CER(20:0)	CER(20:1)	CER(22:0)	CER(22:1)	CER(24:0)	CER(24:1)	CER(26:0)	CER(26:1)	DAG(12:0/16:0)	DAG(12:0/18:0)	DAG(12:0/18:1)	DAG(12:0/18:2)	DAG(14:0/14:0)	DAG(14:0/16:0)	DAG(14:0/16:1)	DAG(14:0/18:1)	DAG(14:0/18:2)	DAG(14:0/18:3)	DAG(14:0/20:0)
Prepared Blank_Batch#1	.	.	.	.	.	.	.	.	32.5731	67.4269	.	.	.	.	.	.	.	.	.	.	.	.	.	.	.	.	100	.	.	.	.	.	.	.	.	.	.	.	.	.	.	.	2.1158	.	.	.	.	.	.
QC-06700	0.0309	0.6758	0.0465	0.1982	9.6811	2.8044	0.2016	0.9875	17.1504	53.4741	2.0301	0.0507	2.3331	0.3309	0.0641	0.8514	6.6846	0.6427	0.0222	0.1181	0.6872	0.0305	0.0954	0.6246	0.1459	0.0382	.	5.2758	.	.	2.0064	.	15.9976	.	57.8295	18.8907	.	.	.	.	.	.	.	0.7079	.	0.9234	0.6853	.	.
KK3018_6	.	.	.	.	.	45.0622	.	.	.	54.9378	.	.	.	.	.	.	.	.	.	.	.	.	.	.	.	.	.	.	.	.	.	.	.	.	.	.	.	.	1.1117	.	2.444	1.5655	10.9258	3.0558	25.0151	5.9747	1.9802	.	.
KK3018_19	.	.	.	.	.	48.7441	.	.	28.5865	22.6694	.	.	.	.	.	.	.	.	.	.	.	.	.	.	.	.	.	.	.	.	.	.	.	.	.	.	.	.	0.9934	.	2.456	0.8338	10.6914	2.4077	25.8871	5.3375	0.9184	.	.
KK3018_1	.	.	.	.	.	.	.	.	100	.	.	.	.	.	.	.	.	.	.	.	.	.	.	.	.	.	.	.	.	.	.	.	.	.	.	.	.	.	1.3001	.	2.9071	1.2844	9.1614	2.8265	22.3541	6.1466	1.9369	.	.
KK3018_20	.	49.3518	.	.	.	50.6482	.	.	.	.	.	.	.	.	.	.	.	.	.	.	.	.	.	.	.	.	.	.	.	.	.	.	.	.	.	.	.	.	1.5263	.	2.7723	1.2226	8.816	2.3485	23.9868	5.9722	1.1235	.	.
KK3018_15	.	26.0282	.	.	.	41.0134	.	.	32.9584	.	.	.	.	.	.	.	.	.	.	.	.	.	.	.	.	.	.	.	.	.	.	.	.	.	.	.	.	.	1.0396	.	2.9669	1.1374	7.1756	2.194	21.2815	6.1298	1.1632	.	.
KK3018_14	.	26.3683	.	.	.	36.9479	.	.	25.0206	11.6632	.	.	.	.	.	.	.	.	.	.	.	.	.	.	.	.	.	.	.	.	.	.	.	.	.	.	.	.	1.3686	0.3432	2.6626	1.4647	10.2111	3.563	21.7048	5.2057	1.6931	.	.
KK3018_7	.	52.5135	.	.	.	47.4865	.	.	.	.	.	.	.	.	.	.	.	.	.	.	.	.	.	.	.	.	.	.	.	.	.	.	.	.	.	.	.	.	1.7564	.	2.1303	1.4218	11.5601	3.544	18.1444	4.6249	1.5307	.	.
KK3018_2	.	.	.	.	.	100	.	.	.	.	.	.	.	.	.	.	.	.	.	.	.	.	.	.	.	.	.	.	.	.	.	.	.	.	.	.	.	.	0.7574	.	2.8827	.	6.9076	2.1023	29.5735	7.7326	.	.	.
KK3018_10	.	.	.	.	12.7056	23.9321	.	.	26.649	36.7132	.	.	.	.	.	.	.	.	.	.	.	.	.	.	.	.	.	.	.	.	.	.	.	.	.	.	.	.	.	.	2.7514	0.8962	.	.	28.7135	8.0918	2.0068	.	.
KK3018_13	.	.	.	.	.	100	.	.	.	.	.	.	.	.	.	.	.	.	.	.	.	.	.	.	.	.	.	.	.	.	.	.	.	.	.	.	.	.	1.0896	.	2.5845	0.9051	6.9973	2.7447	28.1281	7.0297	1.591	.	.
KK3018_8	.	27.1555	.	.	.	44.1249	.	.	28.7196	.	.	.	.	.	.	.	.	.	.	.	.	.	.	.	.	.	.	.	.	.	.	.	.	.	.	.	.	.	1.335	.	2.3537	1.0061	7.7791	2.5915	22.823	5.4306	1.0861	.	.
KK3018_16	.	.	.	.	.	100	.	.	.	.	.	.	.	.	.	.	.	.	.	.	.	.	.	.	.	.	.	.	.	.	.	.	.	.	.	.	.	.	.	.	3.5006	.	.	.	35.5862	9.0526	.	.	.
KK3018_12	.	.	.	.	.	58.7667	.	.	41.2333	.	.	.	.	.	.	.	.	.	.	.	.	.	.	.	.	.	.	.	.	.	.	.	.	.	.	.	.	.	1.3742	.	1.454	0.7427	13.469	3.9639	15.9566	3.9246	1.0589	.	.
KK3018_4	.	58.2914	.	.	.	41.7086	.	.	.	.	.	.	.	.	.	.	.	.	.	.	.	.	.	.	.	.	.	.	.	.	.	.	.	.	.	.	.	.	1.3623	0.3574	2.3499	1.2874	10.8085	3.2051	20.3882	4.8173	1.3879	.	.
KK3018_17	.	40.2013	.	.	.	35.7113	.	.	24.0874	.	.	.	.	.	.	.	.	.	.	.	.	.	.	.	.	.	.	.	.	.	.	.	.	.	.	.	.	.	1.0571	.	1.9798	1.4638	8.415	2.5204	21.4839	4.3862	1.4156	.	.
KK3018_11	.	.	.	.	9.1503	6.8754	.	.	24.6884	48.4202	.	.	.	.	.	.	10.8656	.	.	.	.	.	.	.	.	.	.	.	.	.	.	.	.	.	.	.	.	.	1.2206	.	2.4579	1.3656	7.989	2.8057	22.1907	5.6735	2.3396	.	.
KK3018_9	.	.	.	.	.	100	.	.	.	.	.	.	.	.	.	.	.	.	.	.	.	.	.	.	.	.	.	.	.	.	.	.	.	.	.	.	.	.	1.0818	.	2.3917	1.4068	9.0778	2.7139	23.2719	6.2854	1.4524	.	.
KK3018_5	18.0158	33.4206	.	.	.	30.7512	.	.	17.8125	.	.	.	.	.	.	.	.	.	.	.	.	.	.	.	.	.	.	.	.	.	.	.	.	.	.	.	.	.	0.9621	.	2.5473	1.5935	7.3192	2.0493	23.5806	4.5274	1.3685	.	.
KK3018_3	.	.	.	.	.	50.0328	.	.	49.9672	.	.	.	.	.	.	.	.	.	.	.	.	.	.	.	.	.	.	.	.	.	.	.	.	.	.	.	.	.	0.8123	0.6151	2.627	1.3967	6.6289	2.2338	23.3165	6.48	1.7231	.	.
KK3018_18	.	.	.	.	.	100	.	.	.	.	.	.	.	.	.	.	.	.	.	.	.	.	.	.	.	.	.	.	.	.	.	.	.	.	.	.	.	.	0.9748	.	2.7007	.	7.5848	2.4927	31.8726	7.0432	.	.	.
QC-06701	0.0267	0.7176	0.0463	0.2142	9.9248	2.6815	0.196	0.9985	16.9585	53.5655	2.029	0.0544	2.3872	0.3565	0.0733	0.8455	6.4945	0.6383	0.0236	0.1176	0.7262	0.0359	0.0952	0.6064	0.1429	0.0439	.	5.7992	.	.	.	.	16.7452	.	59.5506	17.905	.	.	.	.	.	.	.	0.6611	.	0.8791	0.8531	.	.
[truncated: 1,021 more columns]

## Sheet: Lipid Class Concentration
Sample ID	CE	CER	DAG	DCER	FFA	HCER	LCER	LPC	LPE	PC	PE	SM	TAG
Prepared Blank_Batch#1	0.1445	0.0339	1.3375	0.3652	170.3	.	.	.	.	.	.	4.969	2.503
QC-06700	2554.4	4.6042	62.0379	0.2886	647.742	2.208	1.6825	348.049	6.0112	1213.16	106.953	376.25	921.964
KK3018_6	1.165	.	125.296	.	6061.79	.	.	37.3039	105.679	230.99	857.896	36.7154	17187.8
KK3018_19	1.1488	.	97.5644	.	6851.2	.	.	39.5217	97.0363	235.618	1161.23	35.8606	7120.41
KK3018_1	0.5883	.	141.456	.	6814.89	.	.	39.761	95.3871	253.376	984.841	35.3892	18560.1
KK3018_20	2.2928	.	146.464	.	8755.94	.	.	67.214	239.72	192.627	808.853	29.826	16445.6
KK3018_15	1.2866	.	90.8281	0.2759	8060.32	0.117	.	42.6137	121.966	252.249	1187.9	35.6965	5732.87
KK3018_14	1.7952	.	91.9882	.	8190.53	.	.	54.9099	184.772	225.486	1092.33	34.7529	8488.04
KK3018_7	0.9164	.	78.5055	.	8643.19	.	.	63.5322	168.029	243.061	805.149	30.8381	9431.36
KK3018_2	0.9103	.	206.771	.	7040.95	.	.	36.8932	91.1043	235.53	969.328	36.0077	23121.9
KK3018_10	8.5989	.	167.86	.	5744.7	.	.	19.7367	53.3145	365.964	1293.31	59.156	27462.6
KK3018_13	0.6543	.	201.519	.	6924.82	.	.	42.6243	115.006	253.239	1033.11	41.304	26000
KK3018_8	1.802	.	98.3984	.	7452.41	.	.	40.1204	140.807	330.679	1237.26	43.1963	8304.46
KK3018_16	1.9392	.	198.715	.	7799.5	.	.	59.1791	180.507	349.076	1166.33	47.208	40807.4
KK3018_12	0.6658	.	109.764	.	6496.54	.	.	30.9244	64.4577	479.315	1395.09	65.0846	5933.58
KK3018_4	1.208	.	124.286	.	7648.36	0.1398	.	82.4141	233.151	293.438	925.368	40.0534	12387
KK3018_17	1.2587	.	84.3446	.	7219.34	0.1758	.	70.322	174.072	302.17	1061.68	41.1013	5800.85
KK3018_11	8.5167	.	130.111	.	7239.63	.	.	30.7068	84.7463	235.99	944.21	40.2724	16401.6
KK3018_9	0.3744	.	103.415	.	6788.58	.	.	31.7697	73.7417	215.113	904.954	35.1377	15364.9
KK3018_5	1.8794	.	89.4285	.	7815.08	0.1593	.	75.3449	141.699	262.713	975.925	33.1207	7249.72
KK3018_3	1.0866	.	112.325	.	6634.63	.	.	48.849	91.6836	246.399	937.476	38.6969	17314.7
KK3018_18	1.3071	.	277.741	.	6074.62	.	.	82.2989	101.103	253.619	1056.75	45.2955	32882.8
QC-06701	2656.82	5.0511	55.5243	0.5204	748.151	2.4025	2.0089	334.459	5.4405	1225.43	99.6528	374.152	962.411

## Sheet: Lipid Class Composition
Sample ID	CE	CER	DAG	DCER	FFA	HCER	LCER	LPC	LPE	PC	PE	SM	TAG
Prepared Blank_Batch#1	0.0805	0.0189	0.7445	0.2033	94.7938	.	.	.	.	.	.	2.7659	1.3932
QC-06700	40.9009	0.0737	0.9933	0.0046	10.3716	0.0354	0.0269	5.5729	0.0963	19.4249	1.7125	6.0245	14.7624
KK3018_6	0.0047	.	0.5084	.	24.5968	.	.	0.1514	0.4288	0.9373	3.4811	0.149	69.7425
KK3018_19	0.0073	.	0.6238	.	43.8068	.	.	0.2527	0.6205	1.5065	7.4249	0.2293	45.5281
KK3018_1	0.0022	.	0.5254	.	25.3099	.	.	0.1477	0.3543	0.941	3.6576	0.1314	68.9306
KK3018_20	0.0086	.	0.5488	.	32.8078	.	.	0.2518	0.8982	0.7218	3.0307	0.1118	61.6205
KK3018_15	0.0083	.	0.585	0.0018	51.9146	0.0008	.	0.2745	0.7856	1.6247	7.651	0.2299	36.924
KK3018_14	0.0098	.	0.5009	.	44.5995	.	.	0.299	1.0061	1.2278	5.948	0.1892	46.2196
KK3018_7	0.0047	.	0.4033	.	44.4047	.	.	0.3264	0.8633	1.2487	4.1365	0.1584	48.454
KK3018_2	0.0029	.	0.6515	.	22.1836	.	.	0.1162	0.287	0.7421	3.054	0.1134	72.8492
KK3018_10	0.0244	.	0.4772	.	16.3317	.	.	0.0561	0.1516	1.0404	3.6768	0.1682	78.0737
KK3018_13	0.0019	.	0.5822	.	20.0069	.	.	0.1231	0.3323	0.7316	2.9848	0.1193	75.1178
KK3018_8	0.0102	.	0.5575	.	42.2254	.	.	0.2273	0.7978	1.8736	7.0103	0.2448	47.0531
KK3018_16	0.0038	.	0.3926	.	15.411	.	.	0.1169	0.3567	0.6897	2.3045	0.0933	80.6313
KK3018_12	0.0046	.	0.7531	.	44.5719	.	.	0.2122	0.4422	3.2885	9.5715	0.4465	40.7095
KK3018_4	0.0056	.	0.5718	.	35.1885	0.0006	.	0.3792	1.0727	1.35	4.2574	0.1843	56.9899
KK3018_17	0.0085	.	0.5716	.	48.9271	0.0012	.	0.4766	1.1797	2.0479	7.1952	0.2786	39.3136
KK3018_11	0.0339	.	0.518	.	28.825	.	.	0.1223	0.3374	0.9396	3.7594	0.1603	65.304
KK3018_9	0.0016	.	0.4397	.	28.8655	.	.	0.1351	0.3136	0.9147	3.8479	0.1494	65.3325
KK3018_5	0.0113	.	0.5373	.	46.9513	0.001	.	0.4527	0.8513	1.5783	5.8631	0.199	43.5548
KK3018_3	0.0043	.	0.4418	.	26.0941	.	.	0.1921	0.3606	0.9691	3.6871	0.1522	68.0988
KK3018_18	0.0032	.	0.6811	.	14.8977	.	.	0.2018	0.248	0.622	2.5916	0.1111	80.6434
QC-06701	41.0509	0.078	0.8579	0.008	11.5598	0.0371	0.031	5.1678	0.0841	18.9342	1.5397	5.7811	14.8703

## Sheet: Fatty Acid Concentration
Sample ID	CE(FA12:0)	CE(FA14:0)	CE(FA14:1)	CE(FA15:0)	CE(FA16:0)	CE(FA16:1)	CE(FA17:0)	CE(FA18:0)	CE(FA18:1)	CE(FA18:2)	CE(FA18:3)	CE(FA18:4)	CE(FA20:0)	CE(FA20:1)	CE(FA20:2)	CE(FA20:3)	CE(FA20:4)	CE(FA20:5)	CE(FA22:0)	CE(FA22:1)	CE(FA22:2)	CE(FA22:4)	CE(FA22:5)	CE(FA22:6)	CE(FA24:0)	CE(FA24:1)	CER(FA14:0)	CER(FA16:0)	CER(FA18:0)	CER(FA18:1)	CER(FA20:0)	CER(FA20:1)	CER(FA22:0)	CER(FA22:1)	CER(FA24:0)	CER(FA24:1)	CER(FA26:0)	CER(FA26:1)	DAG(FA12:0)	DAG(FA14:0)	DAG(FA14:1)	DAG(FA15:0)	DAG(FA16:0)	DAG(FA16:1)	DAG(FA18:0)	DAG(FA18:1)	DAG(FA18:2)	DAG(FA18:3)	DAG(FA20:0)
Prepared Blank_Batch#1	.	.	.	.	.	.	.	.	0.0471	0.0975	.	.	.	.	.	.	.	.	.	.	.	.	.	.	.	.	0.0339	.	.	.	.	.	.	.	.	.	.	.	.	0.0566	.	.	1.4584	.	1.1601	.	.	.	.
QC-06700	0.7884	17.2635	1.1866	5.0618	247.293	71.6352	5.1508	25.2241	438.091	1365.94	51.8566	1.2944	59.5976	8.4514	1.6383	21.7473	170.751	16.4166	0.566	3.0173	17.5539	0.779	2.4378	15.9541	3.7276	0.976	.	0.2429	.	.	0.0924	.	0.7366	.	2.6626	0.8698	.	.	.	1.4372	.	.	14.4878	1.7641	2.9407	17.3605	9.7915	0.7477	74.705
KK3018_6	.	.	.	.	.	0.525	.	.	.	0.64	.	.	.	.	.	.	.	.	.	.	.	.	.	.	.	.	.	.	.	.	.	.	.	.	.	.	.	.	6.4167	72.5183	3.3695	0.5242	32.8462	85.2309	1.8075	33.0008	14.8787	.	.
KK3018_19	.	.	.	.	.	0.56	.	.	0.3284	0.2604	.	.	.	.	.	.	.	.	.	.	.	.	.	.	.	.	.	.	.	.	.	.	.	.	.	.	.	.	4.179	54.5713	3.2679	0.7031	24.4436	69.7537	4.06	26.1873	7.9629	.	.
KK3018_1	.	.	.	.	.	.	.	.	0.5883	.	.	.	.	.	.	.	.	.	.	.	.	.	.	.	.	.	.	.	.	.	.	.	.	.	.	.	.	.	7.7682	72.9725	3.9439	0.9333	40.1487	95.3642	3.2955	41.9096	16.5753	.	.
KK3018_20	.	1.1315	.	.	.	1.1612	.	.	.	.	.	.	.	.	.	.	.	.	.	.	.	.	.	.	.	.	.	.	.	.	.	.	.	.	.	.	.	.	8.0865	74.7892	6.0604	.	42.0076	103.634	3.9007	42.9803	11.4699	.	.
KK3018_15	.	0.3349	.	.	.	0.5277	.	.	0.4241	.	.	.	.	.	.	.	.	.	.	.	.	.	.	.	.	.	.	.	.	.	.	.	.	.	.	.	.	.	4.672	40.9813	3.4559	0.6866	23.8137	64.0409	3.9613	30.9783	8.5617	0.2281	.
KK3018_14	.	0.4734	.	.	.	0.6633	.	.	0.4492	0.2094	.	.	.	.	.	.	.	.	.	.	.	.	.	.	.	.	.	.	.	.	.	.	.	.	.	.	.	.	5.3713	48.3756	3.4047	0.7697	24.4591	59.655	4.1131	27.4536	10.3743	.	.
KK3018_7	.	0.4812	.	.	.	0.4351	.	.	.	.	.	.	.	.	.	.	.	.	.	.	.	.	.	.	.	.	.	.	.	.	.	.	.	.	.	.	.	.	4.1675	40.0096	2.9249	0.59	24.9822	49.7856	3.4309	22.3057	8.8145	.	.
KK3018_2	.	.	.	.	.	0.9103	.	.	.	.	.	.	.	.	.	.	.	.	.	.	.	.	.	.	.	.	.	.	.	.	.	.	.	.	.	.	.	.	7.5266	110.051	6.5239	1.1944	53.7382	163.099	5.3869	66.0222	.	.	.
KK3018_10	.	.	.	.	1.0925	2.0579	.	.	2.2915	3.1569	.	.	.	.	.	.	.	.	.	.	.	.	.	.	.	.	.	.	.	.	.	.	.	.	.	.	.	.	6.1227	65.1501	4.3177	0.6411	41.0489	137.631	4.157	54.8726	21.78	.	.
KK3018_13	.	.	.	.	.	0.6543	.	.	.	.	.	.	.	.	.	.	.	.	.	.	.	.	.	.	.	.	.	.	.	.	.	.	.	.	.	.	.	.	9.228	107.789	5.1055	0.9351	55.0441	145.92	2.0104	57.3563	19.6507	.	.
KK3018_8	.	0.4893	.	.	.	0.7951	.	.	0.5175	.	.	.	.	.	.	.	.	.	.	.	.	.	.	.	.	.	.	.	.	.	.	.	.	.	.	.	.	.	4.6197	46.7289	3.7267	0.9651	27.0442	69.1836	3.7797	30.8208	9.9281	.	.
KK3018_16	.	.	.	.	.	1.9392	.	.	.	.	.	.	.	.	.	.	.	.	.	.	.	.	.	.	.	.	.	.	.	.	.	.	.	.	.	.	.	.	6.9563	88.704	6.8012	0.6763	51.5077	170.308	3.5003	68.9766	.	.	.
KK3018_12	.	.	.	.	.	0.3913	.	.	0.2745	.	.	.	.	.	.	.	.	.	.	.	.	.	.	.	.	.	.	.	.	.	.	.	.	.	.	.	.	.	3.9197	56.9038	4.7396	0.5216	38.8642	69.0768	4.7205	31.439	9.1646	.	.
KK3018_4	.	0.7041	.	.	.	0.5038	.	.	.	.	.	.	.	.	.	.	.	.	.	.	.	.	.	.	.	.	.	.	.	.	.	.	.	.	.	.	.	.	6.6579	63.9023	4.8508	0.7365	39.1521	80.6488	4.224	36.1083	12.2917	.	.
KK3018_17	.	0.506	.	.	.	0.4495	.	.	0.3032	.	.	.	.	.	.	.	.	.	.	.	.	.	.	.	.	.	.	.	.	.	.	.	.	.	.	.	.	.	3.7961	39.3351	2.9764	0.7895	23.0682	62.4769	2.2787	24.4853	9.2578	.	.
KK3018_11	.	.	.	.	0.7793	0.5856	.	.	2.1026	4.1238	.	.	.	.	.	.	0.9254	.	.	.	.	.	.	.	.	.	.	.	.	.	.	.	.	.	.	.	.	.	6.563	63.7381	3.5968	0.9782	36.741	86.5176	2.4079	39.2463	20.4329	.	.
KK3018_9	.	.	.	.	.	0.3744	.	.	.	.	.	.	.	.	.	.	.	.	.	.	.	.	.	.	.	.	.	.	.	.	.	.	.	.	.	.	.	.	5.0469	53.6509	3.0281	0.6222	30.1675	69.8601	1.9096	31.4875	11.0569	.	.
KK3018_5	0.3386	0.6281	.	.	.	0.5779	.	.	0.3348	.	.	.	.	.	.	.	.	.	.	.	.	.	.	.	.	.	.	.	.	.	.	.	.	.	.	.	.	.	4.5635	41.284	3.0683	0.9854	23.1064	67.262	3.396	25.6107	9.5807	.	.
KK3018_3	.	.	.	.	.	0.5436	.	.	0.5429	.	.	.	.	.	.	.	.	.	.	.	.	.	.	.	.	.	.	.	.	.	.	.	.	.	.	.	.	.	6.123	52.8054	3.1344	0.7041	32.6821	76.9669	5.1225	34.3216	12.7895	.	.
KK3018_18	.	.	.	.	.	1.3071	.	.	.	.	.	.	.	.	.	.	.	.	.	.	.	.	.	.	.	.	.	.	.	.	.	.	.	.	.	.	.	.	10.2084	157.141	7.4568	1.52	75.8064	219.486	5.0557	78.8087	.	.	.
QC-06701	0.7096	19.0655	1.231	5.691	263.684	71.244	5.2069	26.5282	450.557	1423.14	53.907	1.4458	63.4232	9.4713	1.9469	22.4623	172.547	16.9591	0.6266	3.1251	19.2949	0.954	2.5284	16.1109	3.7971	1.1656	.	0.2929	.	.	.	.	0.8458	.	3.008	0.9044	.	.	.	1.3289	.	.	14.2572	2.0408	2.5354	18.713	11.7447	0.5511	59.203
[truncated: 200 more columns]

## Sheet: Fatty Acid Composition
Sample ID	CE(FA12:0)	CE(FA14:0)	CE(FA14:1)	CE(FA15:0)	CE(FA16:0)	CE(FA16:1)	CE(FA17:0)	CE(FA18:0)	CE(FA18:1)	CE(FA18:2)	CE(FA18:3)	CE(FA18:4)	CE(FA20:0)	CE(FA20:1)	CE(FA20:2)	CE(FA20:3)	CE(FA20:4)	CE(FA20:5)	CE(FA22:0)	CE(FA22:1)	CE(FA22:2)	CE(FA22:4)	CE(FA22:5)	CE(FA22:6)	CE(FA24:0)	CE(FA24:1)	CER(FA14:0)	CER(FA16:0)	CER(FA18:0)	CER(FA18:1)	CER(FA20:0)	CER(FA20:1)	CER(FA22:0)	CER(FA22:1)	CER(FA24:0)	CER(FA24:1)	CER(FA26:0)	CER(FA26:1)	DAG(FA12:0)	DAG(FA14:0)	DAG(FA14:1)	DAG(FA15:0)	DAG(FA16:0)	DAG(FA16:1)	DAG(FA18:0)	DAG(FA18:1)	DAG(FA18:2)	DAG(FA18:3)	DAG(FA20:0)
Prepared Blank_Batch#1	.	.	.	.	.	.	.	.	32.5731	67.4269	.	.	.	.	.	.	.	.	.	.	.	.	.	.	.	.	100	.	.	.	.	.	.	.	.	.	.	.	.	2.1158	.	.	54.5165	.	43.3677	.	.	.	.
QC-06700	0.0309	0.6758	0.0465	0.1982	9.6811	2.8044	0.2016	0.9875	17.1504	53.4741	2.0301	0.0507	2.3331	0.3309	0.0641	0.8514	6.6846	0.6427	0.0222	0.1181	0.6872	0.0305	0.0954	0.6246	0.1459	0.0382	.	5.2758	.	.	2.0064	.	15.9976	.	57.8295	18.8907	.	.	.	1.1583	.	.	11.6766	1.4218	2.3701	13.9919	7.8915	0.6026	60.2092
KK3018_6	.	.	.	.	.	45.0622	.	.	.	54.9378	.	.	.	.	.	.	.	.	.	.	.	.	.	.	.	.	.	.	.	.	.	.	.	.	.	.	.	.	2.5606	28.9387	1.3446	0.2092	13.1074	34.0117	0.7213	13.1691	5.9374	.	.
KK3018_19	.	.	.	.	.	48.7441	.	.	28.5865	22.6694	.	.	.	.	.	.	.	.	.	.	.	.	.	.	.	.	.	.	.	.	.	.	.	.	.	.	.	.	2.1417	27.9668	1.6748	0.3603	12.5269	35.7475	2.0807	13.4205	4.0808	.	.
KK3018_1	.	.	.	.	.	.	.	.	100	.	.	.	.	.	.	.	.	.	.	.	.	.	.	.	.	.	.	.	.	.	.	.	.	.	.	.	.	.	2.7458	25.7934	1.394	0.3299	14.1913	33.7082	1.1648	14.8137	5.8589	.	.
KK3018_20	.	49.3518	.	.	.	50.6482	.	.	.	.	.	.	.	.	.	.	.	.	.	.	.	.	.	.	.	.	.	.	.	.	.	.	.	.	.	.	.	.	2.7606	25.5316	2.0689	.	14.3406	35.3786	1.3316	14.6726	3.9156	.	.
KK3018_15	.	26.0282	.	.	.	41.0134	.	.	32.9584	.	.	.	.	.	.	.	.	.	.	.	.	.	.	.	.	.	.	.	.	.	.	.	.	.	.	.	.	.	2.5719	22.5598	1.9024	0.378	13.1092	35.2539	2.1807	17.0532	4.7132	0.1256	.
KK3018_14	.	26.3683	.	.	.	36.9479	.	.	25.0206	11.6632	.	.	.	.	.	.	.	.	.	.	.	.	.	.	.	.	.	.	.	.	.	.	.	.	.	.	.	.	2.9195	26.2944	1.8506	0.4184	13.2947	32.4254	2.2357	14.9223	5.6389	.	.
KK3018_7	.	52.5135	.	.	.	47.4865	.	.	.	.	.	.	.	.	.	.	.	.	.	.	.	.	.	.	.	.	.	.	.	.	.	.	.	.	.	.	.	.	2.6543	25.482	1.8629	0.3758	15.9111	31.7083	2.1852	14.2065	5.614	.	.
KK3018_2	.	.	.	.	.	100	.	.	.	.	.	.	.	.	.	.	.	.	.	.	.	.	.	.	.	.	.	.	.	.	.	.	.	.	.	.	.	.	1.82	26.6118	1.5776	0.2888	12.9946	39.4394	1.3026	15.9651	.	.	.
KK3018_10	.	.	.	.	12.7056	23.9321	.	.	26.649	36.7132	.	.	.	.	.	.	.	.	.	.	.	.	.	.	.	.	.	.	.	.	.	.	.	.	.	.	.	.	1.8238	19.406	1.2861	0.191	12.2271	40.9956	1.2382	16.3447	6.4875	.	.
KK3018_13	.	.	.	.	.	100	.	.	.	.	.	.	.	.	.	.	.	.	.	.	.	.	.	.	.	.	.	.	.	.	.	.	.	.	.	.	.	.	2.2896	26.744	1.2667	0.232	13.6573	36.2049	0.4988	14.231	4.8756	.	.
KK3018_8	.	27.1555	.	.	.	44.1249	.	.	28.7196	.	.	.	.	.	.	.	.	.	.	.	.	.	.	.	.	.	.	.	.	.	.	.	.	.	.	.	.	.	2.3474	23.7448	1.8937	0.4904	13.7422	35.1548	1.9206	15.6613	5.0449	.	.
KK3018_16	.	.	.	.	.	100	.	.	.	.	.	.	.	.	.	.	.	.	.	.	.	.	.	.	.	.	.	.	.	.	.	.	.	.	.	.	.	.	1.7503	22.3194	1.7113	0.1702	12.9602	42.8522	0.8807	17.3557	.	.	.
KK3018_12	.	.	.	.	.	58.7667	.	.	41.2333	.	.	.	.	.	.	.	.	.	.	.	.	.	.	.	.	.	.	.	.	.	.	.	.	.	.	.	.	.	1.7855	25.921	2.159	0.2376	17.7035	31.4661	2.1503	14.3212	4.1747	.	.
KK3018_4	.	58.2914	.	.	.	41.7086	.	.	.	.	.	.	.	.	.	.	.	.	.	.	.	.	.	.	.	.	.	.	.	.	.	.	.	.	.	.	.	.	2.6785	25.7077	1.9515	0.2963	15.7508	32.4448	1.6993	14.5263	4.9449	.	.
KK3018_17	.	40.2013	.	.	.	35.7113	.	.	24.0874	.	.	.	.	.	.	.	.	.	.	.	.	.	.	.	.	.	.	.	.	.	.	.	.	.	.	.	.	.	2.2504	23.3181	1.7644	0.468	13.675	37.0367	1.3508	14.515	5.4881	.	.
KK3018_11	.	.	.	.	9.1503	6.8754	.	.	24.6884	48.4202	.	.	.	.	.	.	10.8656	.	.	.	.	.	.	.	.	.	.	.	.	.	.	.	.	.	.	.	.	.	2.5221	24.4937	1.3822	0.3759	14.1191	33.2476	0.9253	15.0819	7.8521	.	.
KK3018_9	.	.	.	.	.	100	.	.	.	.	.	.	.	.	.	.	.	.	.	.	.	.	.	.	.	.	.	.	.	.	.	.	.	.	.	.	.	.	2.4401	25.9397	1.464	0.3008	14.5857	33.7766	0.9233	15.2239	5.3459	.	.
KK3018_5	18.0158	33.4206	.	.	.	30.7512	.	.	17.8125	.	.	.	.	.	.	.	.	.	.	.	.	.	.	.	.	.	.	.	.	.	.	.	.	.	.	.	.	.	2.5515	23.0821	1.7155	0.5509	12.9189	37.6066	1.8987	14.3191	5.3566	.	.
KK3018_3	.	.	.	.	.	50.0328	.	.	49.9672	.	.	.	.	.	.	.	.	.	.	.	.	.	.	.	.	.	.	.	.	.	.	.	.	.	.	.	.	.	2.7256	23.5057	1.3953	0.3134	14.548	34.2609	2.2802	15.2779	5.6931	.	.
KK3018_18	.	.	.	.	.	100	.	.	.	.	.	.	.	.	.	.	.	.	.	.	.	.	.	.	.	.	.	.	.	.	.	.	.	.	.	.	.	.	1.8377	28.2891	1.3424	0.2736	13.6469	39.5126	0.9101	14.1874	.	.	.
QC-06701	0.0267	0.7176	0.0463	0.2142	9.9248	2.6815	0.196	0.9985	16.9585	53.5655	2.029	0.0544	2.3872	0.3565	0.0733	0.8455	6.4945	0.6383	0.0236	0.1176	0.7262	0.0359	0.0952	0.6064	0.1429	0.0439	.	5.7992	.	.	.	.	16.7452	.	59.5506	17.905	.	.	.	1.1966	.	.	12.8387	1.8377	2.2831	16.8512	10.5762	0.4962	53.3126
[truncated: 200 more columns]
