# Supplementary material for: Fat body phospholipid state dictates hunger-driven feeding behavior
Source: eLife journal article supplement (doi:10.7554/elife.80282), 2022-10-06
Supplement: supp [file elife-80282-supp-v1.zip › elife_poa_e80282_Figure_7_source_data_1.xlsx]

## Sheet: Sheet1
A. Day 14 feeding behavior in PE/PC biosynthesis knockdown flies (fat body specific)
Luc RNAi				eas RNAi				PECT RNAi				Pcyt2 RNAi				PISD RNAi
NF fed	NF stv	HSD fed	HSD stv	HSD fed	HSD stv	NF fed	NF stv	HSD fed	HSD stv	NF fed	NF stv	HSD fed	HSD stv	NF fed	NF stv	NF fed	NF stv	HSD fed	HSD stv
120	98	106	59	0	4	163	124	166	5	17	65	1	67	60	263	18	23	164	330
32	290	94	153	56	17	61	54	76	103	1	55	7	17	20	407	19	32	406	195
34	138	134	146	0	16	58	96	120	137	11	78	10	24	97	199	31	0	202	133
183	437	60	180	6	31	8	76	75		20	61	0	55	16	278	47	0	49	424
113	188	9	128	8	9	75	100	89		92	60	8	27	79	385		37	110	137
65	186	75	130	2		120	87	232		8	1	8	48	97	24			96
75	318	23	65	175		30												172
21	180	128	161	35		33
18	176	69	229	62		0
39	161	3	308	45		1
0	0	29	275	24		18
21	495	109	113	4		8
449	204	106	85	56		15
31	0	49	83	87		5
134	89	50	124			70
39	98	17	120			11
95	74	129	50			16
63	319	23	103			24
289		107
250		63
28		60
50		46
196		73
14		0
182		40
152		28
349		152
84		36
		15
		75
