# Supplementary material for: Fat body phospholipid state dictates hunger-driven feeding behavior
Source: eLife journal article supplement (doi:10.7554/elife.80282), 2022-10-06
Supplement: supp [file elife-80282-supp-v1.zip › elife_poa_e80282_Figure_7_source_data_2.xlsx]

## Sheet: Sheet1
B. Pect Overexpression Hunger Driven Feeding Behavior (NF and HSD)
Genotype	Diet	Fly	Events	Date	Day
PECTOE	NFfed	1	116	827	7
PECTOE	NFfed	2	36	827	7
PECTOE	NFfed	3	7	827	7
PECTOE	NFfed	4	15	827	7
PECTOE	NFfed	5	2	827	7
PECTOE	NFfed	6	8	827	7
PECTOE	NFstv	1	292	827	7
PECTOE	NFstv	2	182	827	7
PECTOE	NFstv	3	258	827	7
PECTOE	NFstv	4	264	827	7
PECTOE	NFstv	5	247	827	7
PECTOE	NFstv	6	183	827	7
PECTOE	NFfed	1	0	1124	14
PECTOE	NFfed	2	1	1124	14
PECTOE	NFfed	3	0	1124	14
PECTOE	NFfed	4	0	1124	14
PECTOE	NFfed	5	1	1124	14
PECTOE	NFfed	6	2	1124	14
PECTOE	NFfed	1	0	1124	14
PECTOE	NFfed	2	4	1124	14
PECTOE	NFfed	3	26	1124	14
PECTOE	NFfed	4	8	1124	14
PECTOE	NFfed	5	1	1124	14
PECTOE	NFfed	6	4	1124	14
PECTOE	NFstv	1	25	1124	14
PECTOE	NFstv	2	2	1124	14
PECTOE	NFstv	3	8	1124	14
PECTOE	NFstv	4	12	1124	14
PECTOE	NFstv	5	10	1124	14
PECTOE	NFstv	6	1	1124	14
PECTOE	NFstv	1	2	1124	14
PECTOE	NFstv	2	33	1124	14
PECTOE	NFstv	3	2	1124	14
PECTOE	NFstv	4	52	1124	14
PECTOE	NFstv	5	18	1124	14
PECTOE	NFstv	6	20	1124	14
PECTOE	HSDfed	1	8	827	7
PECTOE	HSDfed	2	5	827	7
PECTOE	HSDfed	3	17	827	7
PECTOE	HSDfed	4	0	827	7
PECTOE	HSDfed	5	1	827	7
PECTOE	HSDfed	6	3	827	7
PECTOE	HSDfed	1	8	1117	7
PECTOE	HSDfed	2	3	1117	7
PECTOE	HSDfed	3	4	1117	7
PECTOE	HSDfed	4	2	1117	7
PECTOE	HSDfed	5	4	1117	7
PECTOE	HSDfed	6	18	1117	7
PECTOE	HSDfed	1	0	1117	7
PECTOE	HSDfed	2	0	1117	7
PECTOE	HSDfed	3	0	1117	7
PECTOE	HSDfed	4	0	1117	7
PECTOE	HSDfed	5	0	1117	7
PECTOE	HSDfed	6	0	1117	7
PECTOE	HSDstv	1	38	827	7
PECTOE	HSDstv	2	13	827	7
PECTOE	HSDstv	3	3	827	7
PECTOE	HSDstv	4	91	827	7
PECTOE	HSDstv	5	0	827	7
PECTOE	HSDstv	6	31	827	7
PECTOE	HSDstv	1	68	1117	7
PECTOE	HSDstv	2	14	1117	7
PECTOE	HSDstv	3	49	1117	7
PECTOE	HSDstv	4	0	1117	7
PECTOE	HSDstv	5	1	1117	7
PECTOE	HSDstv	6	27	1117	7
PECTOE	HSDstv	1	4	1117	7
PECTOE	HSDstv	2	1	1117	7
PECTOE	HSDstv	3	16	1117	7
PECTOE	HSDstv	4	0	1117	7
PECTOE	HSDstv	5	0	1117	7
PECTOE	HSDstv	6	0	1117	7
PECTOE	HSDfed	1	5	820	14
PECTOE	HSDfed	2	33	820	14
PECTOE	HSDfed	3	72	820	14
PECTOE	HSDfed	4	88	820	14
PECTOE	HSDfed	5	104	820	14
PECTOE	HSDfed	6	93	820	14
PECTOE	HSDfed	1	11	820	14
PECTOE	HSDfed	2	6	820	14
PECTOE	HSDfed	3	15	820	14
PECTOE	HSDfed	4	36	820	14
PECTOE	HSDfed	5	2	820	14
PECTOE	HSDfed	6	9	820	14
PECTOE	HSDfed	1	79	831	14
PECTOE	HSDfed	2	133	831	14
PECTOE	HSDfed	3	285	831	14
PECTOE	HSDfed	4	58	831	14
PECTOE	HSDfed	5	37	831	14
PECTOE	HSDfed	6	121	831	14
PECTOE	HSDfed	1	95	903	14
PECTOE	HSDfed	2	23	903	14
PECTOE	HSDfed	3	28	903	14
PECTOE	HSDfed	4	5	903	14
PECTOE	HSDfed	5	27	903	14
PECTOE	HSDfed	6	40	903	14
PECTOE	HSDstv	1	175	820	14
PECTOE	HSDstv	2	80	820	14
PECTOE	HSDstv	3	263	820	14
PECTOE	HSDstv	4	128	820	14
PECTOE	HSDstv	5	177	820	14
PECTOE	HSDstv	6	148	820	14
PECTOE	HSDstv	1	160	820	14
PECTOE	HSDstv	2	38	820	14
PECTOE	HSDstv	3	242	820	14
PECTOE	HSDstv	4	62	820	14
PECTOE	HSDstv	5	49	820	14
PECTOE	HSDstv	6	146	820	14
PECTOE	HSDstv	1	432	831	14
PECTOE	HSDstv	2	116	831	14
PECTOE	HSDstv	3	292	831	14
PECTOE	HSDstv	4	596	831	14
PECTOE	HSDstv	5	407	831	14
PECTOE	HSDstv	6	219	831	14
PECTOE	HSDstv	1	11	903	14
PECTOE	HSDstv	2	6	903	14
PECTOE	HSDstv	3	28	903	14
PECTOE	HSDstv	4	94	903	14
PECTOE	HSDstv	5	11	903	14
PECTOE	HSDstv	6	2	903	14
