# Supplementary figures and images for: Fat body phospholipid state dictates hunger-driven feeding behavior
Source: eLife journal article supplement (doi:10.7554/elife.80282), 2022-10-06

## Figure 2- figure supplement 2

FOXO accumulation in w1118 (6 hours after diet treatment)

anti-FOXO

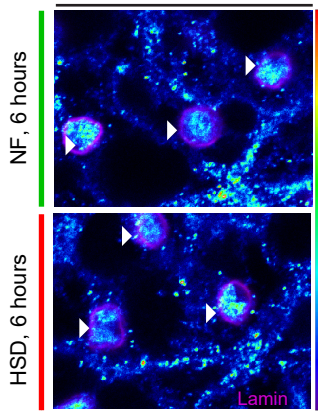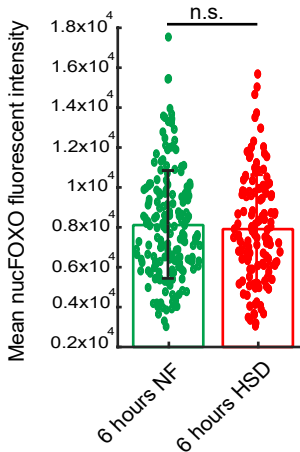

Supplement: supp [file elife-80282-supp-v1.zip]

## Figure 1- figure supplement 2

TAG levels of NF and HSD-fed w1118 flies over time at baseline

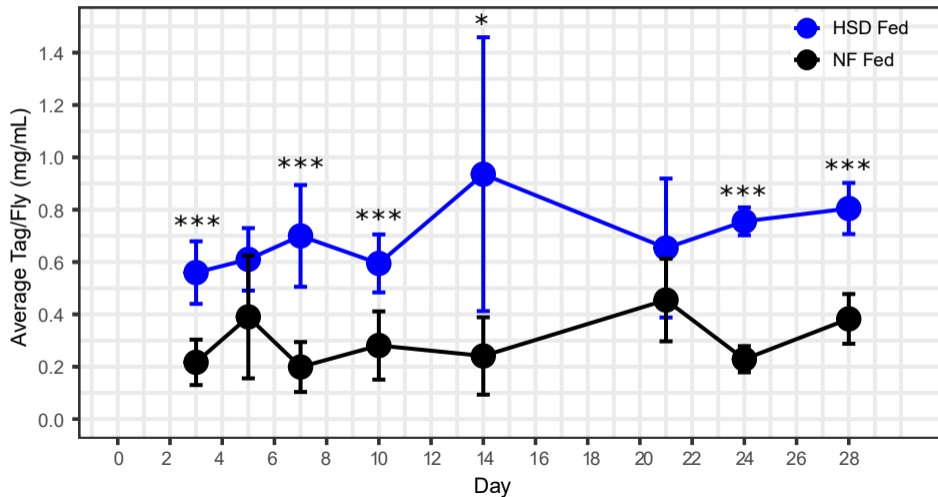

Supplement: supp [file elife-80282-supp-v1.zip]

# Figure 2- figure supplement 1

Dilp2 and 5 expression in w1118

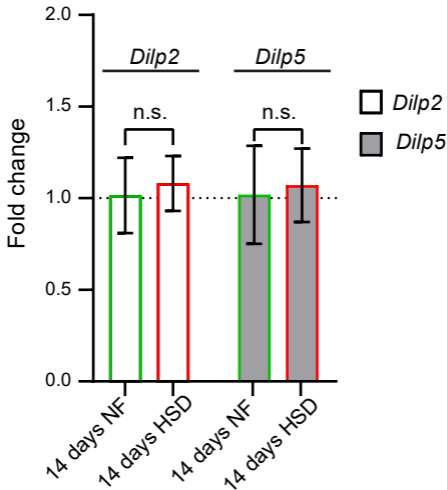

Supplement: supp [file elife-80282-supp-v1.zip]

**Figure 1- figure supplement 1**

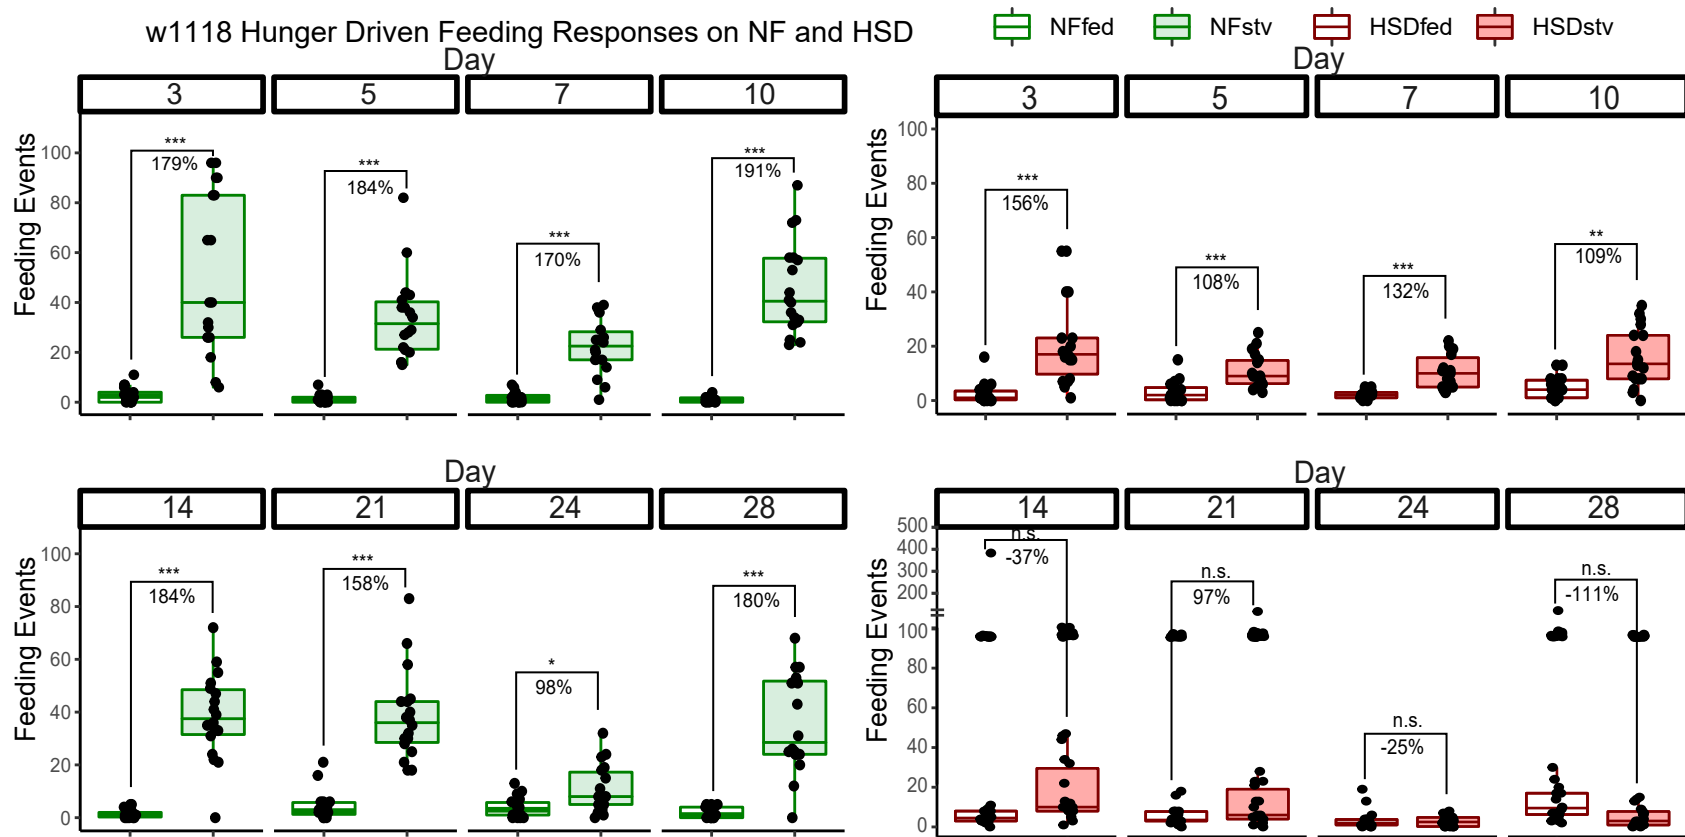

Supplement: supp [file elife-80282-supp-v1.zip › elife_poa_e80282_Figure_1_figure_supplement_1.pdf]

# **Figure 4- figure supplement 1**

*Validation of Apoll antibody generated for this study*

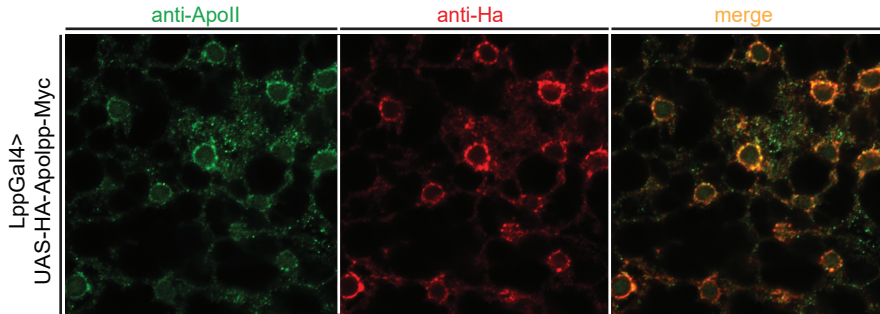

Supplement: supp [file elife-80282-supp-v1.zip › elife_poa_e80282_Figure_4_figure_supplement_1.pdf]

# Figure 6- figure supplement 1

## A. Pect Expression in RNAi and OE lines

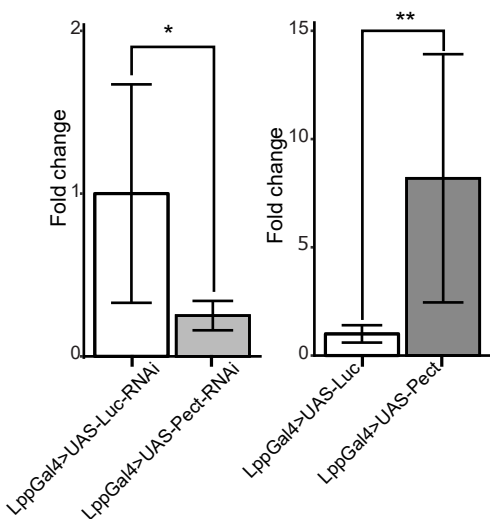

## B. Pect Expression in w1118 over time

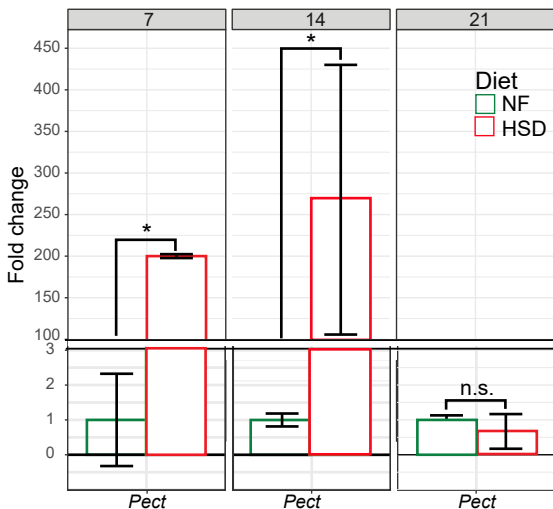

Supplement: supp [file elife-80282-supp-v1.zip › elife_poa_e80282_Figure_6_figure_supplement_1.pdf]
